# Supplementary material for: A nomogram predicting overall survival for metastatic pancreatic cancer: SEER database analysis
Source: Research Square preprint supplement (doi:10.21203/rs.3.rs-1410601/v1), 2022-04-08
Supplement: Supplementary file 1 [file 2ddbf6a31586875eb0ee5cd8.xlsx]

## Sheet: Sheet1
id	Age 1<=60;2>60	Race 1=black;2=white;3=other	Sex 1=male; 2=female	T_stage7	T-8th	Tumor_size	N_stage	Surgery 0= none with Primary site surgery ;1=yes	Grade未分	Grade	Site 1=head 2= bodytail 3=other	Radiation 0=no/NA;1=yes	Chemotherapy;0= NO/NA; 1=yes	Bone 0=NO 1=YES	Brain 0=NO; 1=YES	Liver 0=NO ; 1=YES	Lung 0=NO ; 1=YES	First_malignant tumor =0=NO ; 1=YES	Survival_time	Status 0=live ; 1=dead	ICD-O-3 Hist/behav	SEER cause-specific death classification	SEER other cause of death classification
683882	1	1	2	T2	T2	2	N0	0	unknown	unknown	3	0	0	0	0	1	0	0	1	1	8980/3: Carcinosarcoma, NOS	N/A not first tumor	N/A not first tumor
2851308	2	1	1	T4	T4	3	N0	1	unknown	unknown	1	0	1	0	0	1	0	0	5	1	8550/3: Acinar cell carcinoma	N/A not first tumor	N/A not first tumor
2883781	2	1	2	T1	T1	1	N1	0	unknown	unknown	2	0	1	0	0	1	0	0	2	1	8140/3: Adenocarcinoma, NOS	N/A not first tumor	N/A not first tumor
3428810	2	1	2	T2	T3	3	N1	0	unknown	unknown	3	0	0	0	0	1	0	0	1	1	8140/3: Adenocarcinoma, NOS	N/A not first tumor	N/A not first tumor
3549832	2	1	1	T4	T4	2	N0	0	unknown	unknown	1	0	0	0	0	0	0	0	2	1	8140/3: Adenocarcinoma, NOS	N/A not first tumor	N/A not first tumor
3988297	2	1	1	T3	T2	2	N1	0	unknown	unknown	1	0	0	0	0	1	0	1	3	1	8140/3: Adenocarcinoma, NOS	Dead (attributable to this cancer dx)	Alive or dead due to cancer
4005058	2	1	2	T2	T3	3	N0	0	2	2	2	0	1	0	0	1	0	1	8	1	8140/3: Adenocarcinoma, NOS	Dead (attributable to this cancer dx)	Alive or dead due to cancer
4007971	1	1	1	T3	T1	1	N1	0	unknown	unknown	1	0	1	0	0	1	0	1	4	1	8140/3: Adenocarcinoma, NOS	Dead (attributable to this cancer dx)	Alive or dead due to cancer
4007972	2	1	1	T3	T2	2	N0	0	4	3	1	0	0	0	0	1	0	1	1	1	8046/3: Non-small cell carcinoma	Dead (attributable to this cancer dx)	Alive or dead due to cancer
4013281	2	1	2	T3	T3	3	N1	1	2	2	3	0	1	0	0	0	0	1	22	1	8140/3: Adenocarcinoma, NOS	Dead (attributable to this cancer dx)	Alive or dead due to cancer
4026215	2	1	1	T3	T2	2	N0	0	unknown	unknown	1	0	1	0	0	1	0	1	15	1	8500/3: Infiltrating duct carcinoma, NOS	Dead (attributable to this cancer dx)	Alive or dead due to cancer
4031981	2	1	1	T4	T4	2	N0	0	unknown	unknown	1	0	1	0	0	1	0	1	11	1	8140/3: Adenocarcinoma, NOS	Dead (attributable to this cancer dx)	Alive or dead due to cancer
4037246	2	1	2	T2	T2	2	N1	0	unknown	unknown	3	0	1	0	0	1	0	1	3	1	8140/3: Adenocarcinoma, NOS	Dead (attributable to this cancer dx)	Alive or dead due to cancer
4037482	2	1	2	T2	T3	3	N0	0	1	1	3	0	0	0	0	0	0	1	3	1	8140/3: Adenocarcinoma, NOS	Dead (attributable to this cancer dx)	Alive or dead due to cancer
4037615	2	1	2	T4	T4	3	N1	0	3	3	3	1	0	0	0	1	0	1	1	1	8140/3: Adenocarcinoma, NOS	N/A not first tumor	N/A not first tumor
4046423	2	1	2	T4	T4	3	N1	0	unknown	unknown	2	0	1	0	0	1	0	1	18	1	8140/3: Adenocarcinoma, NOS	Dead (attributable to this cancer dx)	Alive or dead due to cancer
4058290	1	1	1	T3	T3	3	N1	1	2	2	1	1	0	0	0	1	0	1	60	0	8246/3: Neuroendocrine carcinoma, NOS	Alive or dead of other cause	Alive or dead due to cancer
4059836	2	1	2	T4	T4	3	N0	0	unknown	unknown	2	0	0	1	0	0	0	1	6	1	8140/3: Adenocarcinoma, NOS	Dead (attributable to this cancer dx)	Alive or dead due to cancer
4060065	1	1	2	T2	T3	3	N0	0	unknown	unknown	3	0	0	0	0	1	0	1	63	0	8010/3: Carcinoma, NOS	Alive or dead of other cause	Alive or dead due to cancer
4074068	2	1	2	T2	T2	2	N0	0	unknown	unknown	1	0	1	0	0	1	0	1	7	1	8140/3: Adenocarcinoma, NOS	Dead (missing/unknown COD)	Dead (missing/unknown COD)
4078106	1	1	1	T3	T2	2	N0	1	2	2	3	0	0	0	0	1	0	1	58	0	8246/3: Neuroendocrine carcinoma, NOS	Alive or dead of other cause	Alive or dead due to cancer
4091127	1	1	1	T1	T1	1	N0	0	unknown	unknown	2	0	1	0	0	1	0	1	36	1	8246/3: Neuroendocrine carcinoma, NOS	Dead (attributable to this cancer dx)	Alive or dead due to cancer
4102780	2	1	2	T3	T2	2	N1	1	unknown	unknown	1	0	1	0	0	1	0	1	13	1	8500/3: Infiltrating duct carcinoma, NOS	Dead (attributable to this cancer dx)	Alive or dead due to cancer
4107127	2	1	2	T2	T2	2	N0	0	unknown	unknown	3	0	1	0	0	0	0	1	9	1	8140/3: Adenocarcinoma, NOS	Dead (attributable to this cancer dx)	Alive or dead due to cancer
4120309	1	1	1	T2	T3	3	N1	0	unknown	unknown	2	0	1	0	0	1	0	1	17	1	8246/3: Neuroendocrine carcinoma, NOS	Dead (attributable to this cancer dx)	Alive or dead due to cancer
4125839	1	1	2	T2	T2	2	N1	0	unknown	unknown	2	1	1	0	0	1	0	1	6	1	8140/3: Adenocarcinoma, NOS	Dead (attributable to this cancer dx)	Alive or dead due to cancer
4131708	2	1	1	T3	T2	2	N0	0	unknown	unknown	1	0	1	0	0	1	0	1	10	0	8140/3: Adenocarcinoma, NOS	Alive or dead of other cause	Alive or dead due to cancer
4137149	2	1	1	T2	T2	2	N0	0	unknown	unknown	1	0	1	0	0	1	0	1	7	1	8160/3: Cholangiocarcinoma	Alive or dead of other cause	Dead (attributable to causes other than this cancer dx)
4138056	1	1	2	T4	T4	3	N1	0	unknown	unknown	3	0	1	0	0	0	0	1	23	1	8140/3: Adenocarcinoma, NOS	Dead (attributable to this cancer dx)	Alive or dead due to cancer
4535716	1	1	1	T2	T3	3	N1	0	unknown	unknown	2	0	1	0	0	1	0	1	12	0	8140/3: Adenocarcinoma, NOS	Alive or dead of other cause	Alive or dead due to cancer
4540052	2	1	1	T3	T3	3	N0	0	4	3	3	0	1	0	0	1	0	1	7	1	8140/3: Adenocarcinoma, NOS	Dead (attributable to this cancer dx)	Alive or dead due to cancer
4540969	2	1	1	T2	T2	2	N0	0	unknown	unknown	2	0	0	1	0	0	1	1	1	1	8140/3: Adenocarcinoma, NOS	Dead (attributable to this cancer dx)	Alive or dead due to cancer
4545424	2	1	1	T3	T2	2	N1	0	2	2	1	0	1	0	0	0	0	1	8	1	8490/3: Signet ring cell carcinoma	Dead (missing/unknown COD)	Dead (missing/unknown COD)
4546160	2	1	2	T3	T3	3	N1	0	unknown	unknown	2	0	0	0	0	0	1	1	2	1	8500/3: Infiltrating duct carcinoma, NOS	Dead (attributable to this cancer dx)	Alive or dead due to cancer
4552440	2	1	1	T4	T4	3	N1	1	unknown	unknown	1	1	1	1	0	0	0	1	4	1	8013/3: Large cell neuroendocrine carcinoma	Dead (missing/unknown COD)	Dead (missing/unknown COD)
4564183	2	1	2	T2	T3	3	N1	0	unknown	unknown	1	0	0	0	0	1	1	1	5	1	8140/3: Adenocarcinoma, NOS	Dead (missing/unknown COD)	Dead (missing/unknown COD)
4567212	1	1	2	T2	T2	2	N0	1	1	1	2	0	0	0	0	1	0	1	31	0	8240/3: Carcinoid tumor, NOS	Alive or dead of other cause	Alive or dead due to cancer
4568246	2	1	1	T3	T3	3	N1	0	2	2	1	0	1	0	0	1	0	1	14	1	8140/3: Adenocarcinoma, NOS	Dead (attributable to this cancer dx)	Alive or dead due to cancer
4568940	2	1	1	T3	T2	2	N1	0	unknown	unknown	1	0	0	0	0	1	0	1	3	1	8140/3: Adenocarcinoma, NOS	Dead (attributable to this cancer dx)	Alive or dead due to cancer
4570546	1	1	1	T3	T3	3	N0	0	unknown	unknown	2	0	0	0	0	1	0	1	1	0	8140/3: Adenocarcinoma, NOS	Alive or dead of other cause	Alive or dead due to cancer
4572497	1	1	2	T2	T2	2	N1	1	1	1	2	0	0	0	0	1	0	1	2	0	8240/3: Carcinoid tumor, NOS	Alive or dead of other cause	Alive or dead due to cancer
4579111	1	1	1	T2	T2	2	N0	0	3	3	1	0	1	0	0	1	0	1	6	1	8140/3: Adenocarcinoma, NOS	Dead (attributable to this cancer dx)	Alive or dead due to cancer
4588703	1	1	2	T2	T3	3	N0	0	3	3	1	1	1	0	0	1	0	1	20	0	8246/3: Neuroendocrine carcinoma, NOS	Alive or dead of other cause	Alive or dead due to cancer
4589140	2	1	2	T3	T1	1	N0	1	3	3	2	0	1	0	0	1	0	1	19	0	8550/3: Acinar cell carcinoma	Alive or dead of other cause	Alive or dead due to cancer
4595092	2	1	1	T3	T3	3	N1	0	unknown	unknown	2	0	1	0	0	1	0	1	6	1	8480/3: Mucinous adenocarcinoma	Dead (attributable to this cancer dx)	Alive or dead due to cancer
4598463	1	1	1	T3	T3	3	N0	1	2	2	2	1	1	0	0	1	0	1	18	0	8140/3: Adenocarcinoma, NOS	Alive or dead of other cause	Alive or dead due to cancer
4604181	2	1	1	T4	T4	3	N0	0	2	2	2	1	0	0	0	1	0	1	16	0	8249/3: Atypical carcinoid tumor	Alive or dead of other cause	Alive or dead due to cancer
4612748	2	1	2	T3	T3	3	N1	0	unknown	unknown	3	0	1	0	0	1	1	1	4	1	8140/3: Adenocarcinoma, NOS	Dead (attributable to this cancer dx)	Alive or dead due to cancer
4617413	2	1	2	T1	T1	1	N0	0	unknown	unknown	1	0	1	0	0	1	0	1	6	1	8140/3: Adenocarcinoma, NOS	Dead (attributable to this cancer dx)	Alive or dead due to cancer
4618539	1	1	2	T2	T3	3	N0	0	3	3	2	0	1	0	0	1	0	1	12	0	8140/3: Adenocarcinoma, NOS	Alive or dead of other cause	Alive or dead due to cancer
6325014	2	1	2	T4	T4	2	N0	0	2	2	3	0	0	0	0	1	0	0	4	1	8140/3: Adenocarcinoma, NOS	N/A not first tumor	N/A not first tumor
8961626	2	1	1	T1	T1	1	N1	0	2	2	3	0	0	0	0	1	0	1	4	1	8140/3: Adenocarcinoma, NOS	Dead (attributable to this cancer dx)	Alive or dead due to cancer
8971985	2	1	1	T3	T2	2	N1	0	unknown	unknown	2	0	1	0	0	1	0	1	2	1	8140/3: Adenocarcinoma, NOS	Dead (attributable to this cancer dx)	Alive or dead due to cancer
8974887	1	1	1	T2	T2	2	N0	0	unknown	unknown	1	0	0	0	0	1	0	1	5	1	8140/3: Adenocarcinoma, NOS	Dead (attributable to this cancer dx)	Alive or dead due to cancer
8980865	2	1	1	T3	T3	3	N1	0	2	2	1	0	1	0	0	0	1	1	5	1	8140/3: Adenocarcinoma, NOS	Dead (attributable to this cancer dx)	Alive or dead due to cancer
8982552	2	1	2	T3	T2	2	N0	0	unknown	unknown	1	0	0	0	0	1	0	1	3	1	8480/3: Mucinous adenocarcinoma	Dead (attributable to this cancer dx)	Alive or dead due to cancer
8987280	1	1	2	T4	T4	3	N1	0	3	3	1	0	1	0	0	1	0	1	9	1	8140/3: Adenocarcinoma, NOS	Dead (attributable to this cancer dx)	Alive or dead due to cancer
8992897	2	1	2	T3	T2	2	N1	1	3	3	1	0	1	0	0	0	0	1	5	1	8140/3: Adenocarcinoma, NOS	Dead (attributable to this cancer dx)	Alive or dead due to cancer
8996885	1	1	1	T3	T2	2	N1	0	unknown	unknown	1	0	1	0	0	1	0	1	5	1	8140/3: Adenocarcinoma, NOS	Dead (attributable to this cancer dx)	Alive or dead due to cancer
9002042	2	1	2	T2	T2	2	N0	0	unknown	unknown	2	0	1	0	0	1	0	1	10	1	8140/3: Adenocarcinoma, NOS	Dead (attributable to this cancer dx)	Alive or dead due to cancer
9005804	1	1	1	T2	T2	2	N0	0	2	2	2	0	1	0	0	1	1	1	8	1	8480/3: Mucinous adenocarcinoma	Dead (attributable to this cancer dx)	Alive or dead due to cancer
9020399	2	1	2	T3	T2	2	N1	0	unknown	unknown	1	0	1	0	0	1	0	1	8	1	8010/3: Carcinoma, NOS	Dead (attributable to this cancer dx)	Alive or dead due to cancer
9042484	2	1	2	T4	T4	3	N1	0	unknown	unknown	1	0	1	0	0	1	0	1	4	0	8140/3: Adenocarcinoma, NOS	Alive or dead of other cause	Alive or dead due to cancer
9046685	2	1	1	T1	T1	1	N1	0	2	2	2	0	1	0	0	1	1	0	1	1	8140/3: Adenocarcinoma, NOS	N/A not first tumor	N/A not first tumor
9052386	1	1	1	T2	T2	2	N1	0	2	2	2	0	0	0	0	1	1	1	1	1	8140/3: Adenocarcinoma, NOS	Dead (attributable to this cancer dx)	Alive or dead due to cancer
9057942	1	2	2	T2	T2	2	N0	0	unknown	unknown	1	0	1	0	0	0	1	1	14	1	8140/3: Adenocarcinoma, NOS	Dead (attributable to this cancer dx)	Alive or dead due to cancer
9503566	1	1	2	T3	T3	3	N1	0	3	3	1	0	1	0	0	0	0	1	4	1	8140/3: Adenocarcinoma, NOS	Dead (attributable to this cancer dx)	Alive or dead due to cancer
9511260	2	1	1	T2	T2	2	N0	0	2	2	1	0	0	0	0	1	0	1	1	1	8140/3: Adenocarcinoma, NOS	Dead (attributable to this cancer dx)	Alive or dead due to cancer
9513755	1	1	1	T3	T3	3	N0	0	unknown	unknown	2	0	1	0	0	1	0	1	8	1	8010/3: Carcinoma, NOS	Dead (attributable to this cancer dx)	Alive or dead due to cancer
9514647	2	1	1	T2	T3	3	N1	0	unknown	unknown	1	0	1	0	0	1	0	1	1	1	8140/3: Adenocarcinoma, NOS	Dead (attributable to this cancer dx)	Alive or dead due to cancer
9518229	2	1	1	T4	T4	2	N0	0	1	1	3	0	1	0	0	1	0	1	12	1	8140/3: Adenocarcinoma, NOS	Dead (attributable to this cancer dx)	Alive or dead due to cancer
9530516	1	1	2	T3	T3	3	N0	0	unknown	unknown	1	0	0	0	0	1	0	1	5	0	8240/3: Carcinoid tumor, NOS	Alive or dead of other cause	Alive or dead due to cancer
9533299	1	1	2	T4	T4	2	N0	1	unknown	unknown	1	0	1	0	0	0	0	1	18	1	8140/3: Adenocarcinoma, NOS	Dead (attributable to this cancer dx)	Alive or dead due to cancer
9547662	1	1	1	T4	T4	3	N1	0	1	1	1	0	1	0	0	0	0	1	6	0	8500/3: Infiltrating duct carcinoma, NOS	Alive or dead of other cause	Alive or dead due to cancer
9550327	2	1	1	T2	T3	3	N0	0	unknown	unknown	2	0	1	0	0	1	0	1	2	0	8140/3: Adenocarcinoma, NOS	Alive or dead of other cause	Alive or dead due to cancer
9554334	2	1	1	T3	T2	2	N0	0	3	3	2	0	1	0	0	1	0	1	11	1	8500/3: Infiltrating duct carcinoma, NOS	Dead (attributable to this cancer dx)	Alive or dead due to cancer
9556319	2	1	1	T2	T2	2	N1	0	2	2	2	0	1	0	0	0	0	1	21	1	8140/3: Adenocarcinoma, NOS	Dead (attributable to this cancer dx)	Alive or dead due to cancer
9558248	2	1	1	T2	T2	2	N0	0	unknown	unknown	2	0	1	0	0	1	1	1	5	1	8140/3: Adenocarcinoma, NOS	Dead (attributable to this cancer dx)	Alive or dead due to cancer
9559524	1	1	2	T3	T2	2	N1	0	unknown	unknown	2	0	1	0	0	1	0	1	19	0	8480/3: Mucinous adenocarcinoma	Alive or dead of other cause	Alive or dead due to cancer
9560065	2	2	2	T4	T4	1	N0	0	2	2	3	0	0	0	0	0	0	1	2	1	8140/3: Adenocarcinoma, NOS	Dead (attributable to this cancer dx)	Alive or dead due to cancer
13453990	2	1	2	T3	T3	3	N1	0	unknown	unknown	2	0	1	0	0	1	0	0	14	1	8500/3: Infiltrating duct carcinoma, NOS	N/A not first tumor	N/A not first tumor
14011963	1	1	1	T2	T3	3	N0	0	unknown	unknown	3	0	1	0	0	0	0	0	4	1	8140/3: Adenocarcinoma, NOS	N/A not first tumor	N/A not first tumor
14013257	2	1	2	T1	T1	1	N1	0	4	3	1	0	1	0	0	1	0	1	4	1	8041/3: Small cell carcinoma, NOS	Dead (attributable to this cancer dx)	Alive or dead due to cancer
14059290	2	1	1	T2	T2	2	N0	0	unknown	unknown	3	1	0	0	1	1	1	0	1	1	8140/3: Adenocarcinoma, NOS	N/A not first tumor	N/A not first tumor
14513041	1	1	1	T3	T3	3	N0	0	3	3	2	0	0	0	0	1	0	1	3	1	8010/3: Carcinoma, NOS	Dead (attributable to this cancer dx)	Alive or dead due to cancer
14515870	1	1	1	T3	T3	3	N0	0	unknown	unknown	3	1	1	0	0	1	0	0	17	1	8481/3: Mucin-producing adenocarcinoma	N/A not first tumor	N/A not first tumor
14577229	1	1	1	T2	T3	3	N0	0	unknown	unknown	2	0	1	0	0	0	0	1	5	1	8140/3: Adenocarcinoma, NOS	Dead (attributable to this cancer dx)	Alive or dead due to cancer
14593926	2	1	1	T2	T2	2	N1	0	unknown	unknown	1	0	0	0	0	1	0	1	1	1	8401/3: Apocrine adenocarcinoma	Dead (attributable to this cancer dx)	Alive or dead due to cancer
14637930	2	1	2	T4	T4	3	N1	0	unknown	unknown	2	0	0	0	0	1	1	1	1	1	8140/3: Adenocarcinoma, NOS	Dead (attributable to this cancer dx)	Alive or dead due to cancer
15060656	2	1	2	T3	T3	3	N0	0	unknown	unknown	2	0	1	0	0	1	0	1	4	1	8140/3: Adenocarcinoma, NOS	Dead (attributable to this cancer dx)	Alive or dead due to cancer
15067256	2	1	1	T2	T3	3	N1	0	unknown	unknown	3	0	1	0	0	1	0	1	9	1	8140/3: Adenocarcinoma, NOS	Dead (attributable to this cancer dx)	Alive or dead due to cancer
15083649	1	1	1	T4	T4	3	N1	0	unknown	unknown	3	0	1	0	0	1	0	1	15	1	8140/3: Adenocarcinoma, NOS	Dead (attributable to this cancer dx)	Alive or dead due to cancer
15085304	2	1	2	T2	T3	3	N0	0	unknown	unknown	2	0	1	0	0	1	0	1	14	1	8140/3: Adenocarcinoma, NOS	Dead (attributable to this cancer dx)	Alive or dead due to cancer
15085589	2	1	2	T4	T4	2	N1	0	unknown	unknown	3	0	0	0	0	1	0	1	1	1	8140/3: Adenocarcinoma, NOS	Dead (attributable to this cancer dx)	Alive or dead due to cancer
15106543	2	1	1	T3	T3	3	N1	0	unknown	unknown	2	0	1	0	0	1	1	1	16	1	8550/3: Acinar cell carcinoma	Dead (attributable to this cancer dx)	Alive or dead due to cancer
15659098	1	1	2	T4	T4	2	N0	0	unknown	unknown	2	0	0	0	0	0	0	0	3	1	8140/3: Adenocarcinoma, NOS	N/A not first tumor	N/A not first tumor
16509788	2	3	2	T4	T4	2	N0	0	unknown	unknown	2	0	0	0	0	1	0	1	16	1	8140/3: Adenocarcinoma, NOS	N/A not first tumor	N/A not first tumor
16519572	2	1	2	T4	T4	3	N0	0	2	2	3	0	0	0	0	0	0	1	1	1	8140/3: Adenocarcinoma, NOS	Dead (attributable to this cancer dx)	Alive or dead due to cancer
16549438	2	1	2	T4	T4	3	N0	0	unknown	unknown	1	0	0	0	0	1	0	1	1	1	8140/3: Adenocarcinoma, NOS	Dead (attributable to this cancer dx)	Alive or dead due to cancer
16553460	2	1	1	T3	T2	2	N0	0	2	2	2	0	1	0	0	1	0	1	10	1	8140/3: Adenocarcinoma, NOS	Dead (attributable to this cancer dx)	Alive or dead due to cancer
16565964	2	3	2	T3	T2	2	N0	0	unknown	unknown	1	0	0	0	0	1	0	0	1	1	8000/3: Neoplasm, malignant	N/A not first tumor	N/A not first tumor
20131970	1	1	1	T3	T3	3	N0	0	unknown	unknown	2	0	1	0	0	1	0	1	15	1	8140/3: Adenocarcinoma, NOS	Dead (attributable to this cancer dx)	Alive or dead due to cancer
20580068	2	1	1	T2	T3	3	N1	0	unknown	unknown	2	0	0	0	0	1	1	1	1	1	8140/3: Adenocarcinoma, NOS	Dead (attributable to this cancer dx)	Alive or dead due to cancer
20658043	1	1	1	T3	T3	3	N1	0	unknown	unknown	2	0	1	0	0	1	0	1	7	1	8140/3: Adenocarcinoma, NOS	Dead (attributable to this cancer dx)	Alive or dead due to cancer
21140336	2	1	1	T2	T3	3	N0	1	unknown	unknown	2	0	0	0	0	1	0	0	3	1	8070/3: Squamous cell carcinoma, NOS	N/A not first tumor	N/A not first tumor
21225620	2	1	1	T4	T4	3	N0	0	3	3	2	0	0	0	0	1	0	0	3	1	8140/3: Adenocarcinoma, NOS	N/A not first tumor	N/A not first tumor
21630052	2	1	1	T2	T3	3	N0	0	2	2	1	0	0	0	0	1	0	0	5	1	8140/3: Adenocarcinoma, NOS	N/A not first tumor	N/A not first tumor
21652744	2	1	1	T2	T3	3	N0	0	unknown	unknown	3	0	0	0	0	1	0	0	3	1	8140/3: Adenocarcinoma, NOS	N/A not first tumor	N/A not first tumor
22127885	1	1	2	T2	T2	2	N0	0	unknown	unknown	1	0	1	0	0	1	0	0	12	0	8140/3: Adenocarcinoma, NOS	N/A not first tumor	N/A not first tumor
22452314	2	1	1	T3	T3	3	N0	0	2	2	3	0	0	1	0	1	0	0	2	1	8140/3: Adenocarcinoma, NOS	N/A not first tumor	N/A not first tumor
22453033	2	1	2	T3	T3	3	N0	0	unknown	unknown	1	0	1	0	0	1	0	1	2	1	8140/3: Adenocarcinoma, NOS	Dead (attributable to this cancer dx)	Alive or dead due to cancer
22455953	2	1	2	T4	T4	3	N0	0	unknown	unknown	3	0	1	1	0	1	1	1	6	1	8140/3: Adenocarcinoma, NOS	Dead (attributable to this cancer dx)	Alive or dead due to cancer
22456464	2	1	2	T2	T2	2	N0	0	unknown	unknown	3	0	0	0	0	1	0	1	16	1	8140/3: Adenocarcinoma, NOS	Dead (attributable to this cancer dx)	Alive or dead due to cancer
22457999	1	1	2	T4	T4	3	N1	0	unknown	unknown	1	1	1	0	0	0	0	1	4	1	8140/3: Adenocarcinoma, NOS	Dead (attributable to this cancer dx)	Alive or dead due to cancer
22461037	2	1	1	T2	T3	3	N1	0	2	2	3	0	1	0	0	1	0	0	5	1	8140/3: Adenocarcinoma, NOS	N/A not first tumor	N/A not first tumor
22461220	1	1	1	T4	T4	3	N1	0	unknown	unknown	1	0	1	0	0	1	0	1	11	0	8010/3: Carcinoma, NOS	Alive or dead of other cause	Alive or dead due to cancer
22461461	2	1	2	T2	T2	2	N1	0	unknown	unknown	1	0	1	0	0	1	0	1	5	1	8140/3: Adenocarcinoma, NOS	Dead (attributable to this cancer dx)	Alive or dead due to cancer
22462012	1	1	1	T2	T3	3	N0	0	1	1	2	0	0	0	0	1	0	1	52	1	8240/3: Carcinoid tumor, NOS	Dead (attributable to this cancer dx)	Alive or dead due to cancer
22463177	2	1	1	T2	T3	3	N1	0	unknown	unknown	2	0	0	0	0	1	0	1	6	1	8140/3: Adenocarcinoma, NOS	Dead (attributable to this cancer dx)	Alive or dead due to cancer
22464225	2	1	1	T2	T2	2	N0	0	unknown	unknown	3	0	1	0	0	1	0	1	4	1	8140/3: Adenocarcinoma, NOS	Dead (attributable to this cancer dx)	Alive or dead due to cancer
22466611	2	1	1	T4	T4	3	N1	0	3	3	3	0	1	0	0	0	0	1	4	1	8140/3: Adenocarcinoma, NOS	Dead (attributable to this cancer dx)	Alive or dead due to cancer
22467848	2	1	2	T2	T3	3	N0	0	unknown	unknown	2	0	1	0	0	1	0	1	10	1	8140/3: Adenocarcinoma, NOS	Dead (attributable to this cancer dx)	Alive or dead due to cancer
22468456	1	1	1	T2	T2	2	N0	0	unknown	unknown	3	0	0	0	0	1	1	1	5	1	8140/3: Adenocarcinoma, NOS	Dead (attributable to this cancer dx)	Alive or dead due to cancer
22472314	2	1	1	T4	T4	3	N1	0	3	3	1	0	1	0	0	1	0	1	2	1	8140/3: Adenocarcinoma, NOS	Dead (attributable to this cancer dx)	Alive or dead due to cancer
22472796	2	1	1	T2	T3	3	N0	0	2	2	1	0	0	0	0	1	0	1	7	1	8140/3: Adenocarcinoma, NOS	Dead (attributable to this cancer dx)	Alive or dead due to cancer
22472999	2	1	1	T3	T3	3	N1	0	unknown	unknown	1	1	0	1	0	1	0	1	1	1	8140/3: Adenocarcinoma, NOS	Dead (attributable to this cancer dx)	Alive or dead due to cancer
22475237	2	1	1	T4	T4	2	N0	0	4	3	1	0	1	0	0	0	0	1	8	1	8140/3: Adenocarcinoma, NOS	Dead (attributable to this cancer dx)	Alive or dead due to cancer
22477278	1	3	2	T4	T4	3	N1	0	unknown	unknown	2	0	0	0	0	0	1	1	17	1	8140/3: Adenocarcinoma, NOS	Dead (attributable to this cancer dx)	Alive or dead due to cancer
22482624	2	1	2	T3	T2	2	N1	0	unknown	unknown	1	0	1	0	0	1	0	1	4	1	8140/3: Adenocarcinoma, NOS	Dead (attributable to this cancer dx)	Alive or dead due to cancer
22487578	1	1	2	T3	T2	2	N1	1	unknown	unknown	2	0	0	0	0	0	0	1	10	1	8140/3: Adenocarcinoma, NOS	Dead (attributable to this cancer dx)	Alive or dead due to cancer
22491049	1	1	1	T3	T2	2	N0	0	unknown	unknown	1	0	0	0	0	0	0	1	2	1	8140/3: Adenocarcinoma, NOS	Dead (attributable to this cancer dx)	Alive or dead due to cancer
22491185	1	1	2	T4	T4	2	N1	0	unknown	unknown	2	0	1	0	0	1	1	1	4	1	8140/3: Adenocarcinoma, NOS	Dead (attributable to this cancer dx)	Alive or dead due to cancer
22491283	1	1	2	T4	T4	2	N0	0	2	2	3	0	1	0	0	1	0	1	5	1	8140/3: Adenocarcinoma, NOS	Dead (attributable to this cancer dx)	Alive or dead due to cancer
22492511	2	1	2	T3	T2	2	N0	0	unknown	unknown	1	0	1	0	0	1	0	1	5	1	8140/3: Adenocarcinoma, NOS	Dead (attributable to this cancer dx)	Alive or dead due to cancer
22494709	2	1	1	T4	T4	3	N1	0	1	1	1	1	1	0	0	1	0	1	32	1	8140/3: Adenocarcinoma, NOS	Dead (attributable to this cancer dx)	Alive or dead due to cancer
22495929	2	1	2	T4	T4	1	N1	0	2	2	2	0	0	0	0	0	0	1	2	1	8140/3: Adenocarcinoma, NOS	Dead (attributable to this cancer dx)	Alive or dead due to cancer
22497378	2	1	2	T4	T4	2	N0	0	unknown	unknown	1	0	1	1	0	0	0	1	22	1	8140/3: Adenocarcinoma, NOS	Dead (attributable to this cancer dx)	Alive or dead due to cancer
22497772	2	1	2	T3	T1	1	N0	0	unknown	unknown	1	0	0	0	0	1	0	1	3	1	8140/3: Adenocarcinoma, NOS	Dead (attributable to this cancer dx)	Alive or dead due to cancer
22502150	2	1	2	T3	T2	2	N1	0	unknown	unknown	3	0	0	0	0	0	1	1	8	1	8480/3: Mucinous adenocarcinoma	Dead (attributable to this cancer dx)	Alive or dead due to cancer
22502159	1	1	1	T3	T3	3	N1	0	unknown	unknown	1	0	1	0	0	1	1	1	5	1	8140/3: Adenocarcinoma, NOS	Dead (attributable to this cancer dx)	Alive or dead due to cancer
22506653	1	1	2	T1	T1	1	N0	0	unknown	unknown	1	0	1	0	0	1	0	1	23	1	8246/3: Neuroendocrine carcinoma, NOS	Dead (attributable to this cancer dx)	Alive or dead due to cancer
22510724	1	1	1	T3	T3	3	N0	0	unknown	unknown	1	0	1	0	0	1	0	1	45	1	8140/3: Adenocarcinoma, NOS	Dead (attributable to this cancer dx)	Alive or dead due to cancer
22512343	2	1	1	T4	T4	3	N0	0	unknown	unknown	1	0	1	0	0	1	0	0	6	1	8140/3: Adenocarcinoma, NOS	N/A not first tumor	N/A not first tumor
22512688	2	1	1	T2	T3	3	N1	0	unknown	unknown	2	0	1	1	0	1	0	1	1	1	8140/3: Adenocarcinoma, NOS	Dead (attributable to this cancer dx)	Alive or dead due to cancer
22512719	1	1	1	T4	T4	3	N1	0	2	2	1	0	1	0	0	1	0	1	1	1	8140/3: Adenocarcinoma, NOS	Dead (attributable to this cancer dx)	Alive or dead due to cancer
22515330	2	1	1	T3	T3	3	N0	0	unknown	unknown	3	0	0	0	0	1	1	1	1	1	8010/3: Carcinoma, NOS	Dead (attributable to this cancer dx)	Alive or dead due to cancer
22516090	2	1	2	T2	T2	2	N0	0	unknown	unknown	1	0	0	0	0	1	0	1	1	1	8140/3: Adenocarcinoma, NOS	Dead (attributable to this cancer dx)	Alive or dead due to cancer
22517601	2	1	2	T2	T2	2	N0	0	1	1	1	0	0	0	0	1	0	1	6	1	8140/3: Adenocarcinoma, NOS	Dead (attributable to this cancer dx)	Alive or dead due to cancer
22518459	1	1	1	T2	T2	2	N1	0	unknown	unknown	1	0	0	0	0	1	0	1	18	1	8140/3: Adenocarcinoma, NOS	Dead (attributable to this cancer dx)	Alive or dead due to cancer
22518640	1	1	2	T3	T2	2	N1	0	unknown	unknown	2	0	1	0	0	1	0	1	2	1	8140/3: Adenocarcinoma, NOS	Dead (attributable to this cancer dx)	Alive or dead due to cancer
22519065	2	1	1	T3	T2	2	N0	0	unknown	unknown	2	0	1	0	0	0	1	1	1	1	8140/3: Adenocarcinoma, NOS	Dead (attributable to this cancer dx)	Alive or dead due to cancer
22521183	2	1	2	T2	T2	2	N0	0	unknown	unknown	2	0	1	0	0	0	0	1	4	1	8140/3: Adenocarcinoma, NOS	Dead (attributable to this cancer dx)	Alive or dead due to cancer
22523694	2	1	1	T1	T1	1	N0	0	unknown	unknown	1	0	1	0	0	1	0	1	7	1	8140/3: Adenocarcinoma, NOS	Dead (attributable to this cancer dx)	Alive or dead due to cancer
22523702	2	1	1	T3	T3	3	N1	0	3	3	1	0	1	0	0	0	1	1	7	1	8140/3: Adenocarcinoma, NOS	Dead (attributable to this cancer dx)	Alive or dead due to cancer
22523930	1	1	2	T3	T2	2	N1	0	unknown	unknown	1	0	0	0	0	1	0	1	8	1	8246/3: Neuroendocrine carcinoma, NOS	Dead (attributable to this cancer dx)	Alive or dead due to cancer
22524828	1	1	2	T4	T4	3	N0	0	2	2	1	0	0	0	0	1	1	1	1	1	8500/3: Infiltrating duct carcinoma, NOS	Dead (attributable to this cancer dx)	Alive or dead due to cancer
22525488	2	1	2	T1	T1	1	N1	0	2	2	2	0	1	0	0	1	0	1	10	1	8140/3: Adenocarcinoma, NOS	Dead (attributable to this cancer dx)	Alive or dead due to cancer
22529020	1	1	1	T4	T4	3	N1	0	unknown	unknown	3	0	1	0	0	1	0	1	32	0	8246/3: Neuroendocrine carcinoma, NOS	Alive or dead of other cause	Alive or dead due to cancer
22529545	2	1	1	T2	T2	2	N1	0	unknown	unknown	1	0	1	0	0	1	1	1	12	1	8140/3: Adenocarcinoma, NOS	Dead (attributable to this cancer dx)	Alive or dead due to cancer
22530079	1	1	2	T4	T4	3	N1	0	1	1	2	0	1	0	0	0	0	0	24	0	8140/3: Adenocarcinoma, NOS	N/A not first tumor	N/A not first tumor
22531959	2	1	2	T1	T1	1	N1	0	unknown	unknown	3	1	1	1	0	1	1	1	3	1	8140/3: Adenocarcinoma, NOS	Dead (attributable to this cancer dx)	Alive or dead due to cancer
22539712	1	1	1	T3	T2	2	N1	0	unknown	unknown	2	0	0	0	0	1	0	1	4	1	8480/3: Mucinous adenocarcinoma	Dead (attributable to this cancer dx)	Alive or dead due to cancer
22540148	2	1	1	T2	T2	2	N0	0	2	2	1	0	0	0	0	1	0	1	2	1	8140/3: Adenocarcinoma, NOS	Dead (attributable to this cancer dx)	Alive or dead due to cancer
22542434	1	1	1	T3	T3	3	N0	0	3	3	1	0	1	0	0	1	0	1	9	1	8140/3: Adenocarcinoma, NOS	Dead (attributable to this cancer dx)	Alive or dead due to cancer
22543674	2	1	1	T4	T4	3	N1	0	unknown	unknown	2	0	1	0	0	0	0	1	6	1	8140/3: Adenocarcinoma, NOS	Dead (attributable to this cancer dx)	Alive or dead due to cancer
22544485	1	1	1	T2	T2	2	N1	0	unknown	unknown	3	0	1	0	0	1	0	1	5	1	8140/3: Adenocarcinoma, NOS	Dead (attributable to this cancer dx)	Alive or dead due to cancer
22544831	2	1	1	T4	T4	3	N0	0	3	3	1	0	0	0	0	0	0	1	4	1	8140/3: Adenocarcinoma, NOS	Dead (attributable to this cancer dx)	Alive or dead due to cancer
22546371	1	1	1	T2	T2	2	N1	0	unknown	unknown	2	0	1	0	0	1	0	1	7	1	8140/3: Adenocarcinoma, NOS	Dead (attributable to this cancer dx)	Alive or dead due to cancer
22546675	2	3	2	T1	T1	1	N0	0	unknown	unknown	2	0	0	0	1	0	0	1	2	1	8140/3: Adenocarcinoma, NOS	Dead (attributable to this cancer dx)	Alive or dead due to cancer
22550888	2	1	2	T4	T4	3	N0	0	unknown	unknown	2	0	0	0	0	0	1	1	9	1	8140/3: Adenocarcinoma, NOS	Dead (missing/unknown COD)	Dead (missing/unknown COD)
22551162	1	1	1	T3	T2	2	N1	0	unknown	unknown	2	0	0	0	0	1	0	1	2	1	8140/3: Adenocarcinoma, NOS	Dead (attributable to this cancer dx)	Alive or dead due to cancer
22553167	2	1	1	T3	T2	2	N0	1	3	3	2	0	0	0	0	1	0	1	3	1	8500/3: Infiltrating duct carcinoma, NOS	Dead (attributable to this cancer dx)	Alive or dead due to cancer
22557317	2	1	1	T3	T3	3	N0	0	3	3	2	0	1	0	0	1	0	1	2	1	8140/3: Adenocarcinoma, NOS	Dead (attributable to this cancer dx)	Alive or dead due to cancer
26307282	2	1	1	T3	T3	3	N1	0	unknown	unknown	3	0	0	0	0	0	0	0	6	1	8500/3: Infiltrating duct carcinoma, NOS	N/A not first tumor	N/A not first tumor
26433870	2	1	2	T1	T1	1	N1	0	unknown	unknown	2	0	0	0	0	1	1	1	2	1	8140/3: Adenocarcinoma, NOS	Dead (attributable to this cancer dx)	Alive or dead due to cancer
26456742	2	1	2	T4	T4	3	N0	0	unknown	unknown	2	0	1	0	0	1	0	1	2	0	8140/3: Adenocarcinoma, NOS	Alive or dead of other cause	Alive or dead due to cancer
26458408	1	1	1	T3	T2	2	N0	0	unknown	unknown	1	0	1	0	0	0	0	1	32	1	8140/3: Adenocarcinoma, NOS	Dead (attributable to this cancer dx)	Alive or dead due to cancer
26898220	1	1	2	T3	T2	2	N1	1	3	3	1	0	0	0	0	1	0	1	3	1	8140/3: Adenocarcinoma, NOS	Dead (attributable to this cancer dx)	Alive or dead due to cancer
27031870	2	1	2	T2	T3	3	N0	0	unknown	unknown	1	0	1	0	0	1	0	1	16	1	8246/3: Neuroendocrine carcinoma, NOS	Dead (attributable to this cancer dx)	Alive or dead due to cancer
27437190	1	1	2	T3	T2	2	N0	0	unknown	unknown	1	0	1	0	0	1	0	1	16	1	8140/3: Adenocarcinoma, NOS	Dead (attributable to this cancer dx)	Alive or dead due to cancer
27456588	1	1	1	T2	T2	2	N0	0	unknown	unknown	3	0	1	0	0	1	0	1	6	1	8140/3: Adenocarcinoma, NOS	Dead (attributable to this cancer dx)	Alive or dead due to cancer
27477712	2	1	2	T2	T3	3	N0	0	unknown	unknown	2	0	1	0	0	1	0	1	1	1	8140/3: Adenocarcinoma, NOS	Dead (attributable to this cancer dx)	Alive or dead due to cancer
27481905	1	1	1	T3	T3	3	N1	0	unknown	unknown	2	0	1	0	0	1	0	1	3	1	8500/3: Infiltrating duct carcinoma, NOS	Dead (missing/unknown COD)	Dead (missing/unknown COD)
28023045	2	1	1	T3	T1	1	N1	1	1	1	1	0	0	0	0	0	0	0	13	1	8500/3: Infiltrating duct carcinoma, NOS	N/A not first tumor	N/A not first tumor
28075967	2	1	2	T3	T2	2	N0	0	unknown	unknown	1	0	1	0	0	1	0	1	11	1	8140/3: Adenocarcinoma, NOS	N/A not first tumor	N/A not first tumor
28099608	2	1	2	T3	T2	2	N1	1	3	3	1	0	1	0	0	0	0	0	9	1	8500/3: Infiltrating duct carcinoma, NOS	N/A not first tumor	N/A not first tumor
28912213	2	1	2	T4	T4	2	N0	0	unknown	unknown	2	0	1	0	0	1	1	0	14	0	8140/3: Adenocarcinoma, NOS	N/A not first tumor	N/A not first tumor
29007280	2	1	2	T2	T2	2	N1	0	3	3	1	0	1	0	0	0	0	1	6	1	8010/3: Carcinoma, NOS	Dead (attributable to this cancer dx)	Alive or dead due to cancer
29008285	2	1	2	T4	T4	3	N1	0	2	2	3	0	1	0	0	1	0	1	21	1	8140/3: Adenocarcinoma, NOS	Dead (attributable to this cancer dx)	Alive or dead due to cancer
29014622	1	1	1	T3	T3	3	N1	1	2	2	1	0	1	0	0	0	0	1	70	0	8500/3: Infiltrating duct carcinoma, NOS	Alive or dead of other cause	Alive or dead due to cancer
29362256	1	1	2	T2	T2	2	N1	0	1	1	1	0	0	0	0	1	0	1	12	0	8246/3: Neuroendocrine carcinoma, NOS	Alive or dead of other cause	Alive or dead due to cancer
29368154	1	1	2	T4	T4	3	N1	1	2	2	3	0	1	0	0	0	0	1	17	1	8500/3: Infiltrating duct carcinoma, NOS	Dead (attributable to this cancer dx)	Alive or dead due to cancer
29382552	1	1	1	T2	T2	2	N1	0	unknown	unknown	3	0	0	0	0	1	0	1	1	1	8246/3: Neuroendocrine carcinoma, NOS	Dead (attributable to this cancer dx)	Alive or dead due to cancer
29410222	2	1	1	T2	T2	2	N0	0	unknown	unknown	1	0	1	0	0	1	0	1	6	1	8140/3: Adenocarcinoma, NOS	Dead (attributable to this cancer dx)	Alive or dead due to cancer
29418620	1	1	2	T2	T3	3	N0	0	unknown	unknown	2	0	1	0	0	1	0	1	5	1	8010/3: Carcinoma, NOS	Dead (attributable to this cancer dx)	Alive or dead due to cancer
29418754	1	1	2	T3	T2	2	N1	0	unknown	unknown	2	0	1	0	0	1	0	1	7	1	8140/3: Adenocarcinoma, NOS	Dead (attributable to this cancer dx)	Alive or dead due to cancer
29425741	1	1	1	T4	T4	2	N0	0	unknown	unknown	1	0	1	0	0	1	0	1	9	1	8140/3: Adenocarcinoma, NOS	Dead (attributable to this cancer dx)	Alive or dead due to cancer
29428368	2	1	2	T4	T4	3	N1	0	2	2	3	0	0	0	0	0	0	1	4	1	8140/3: Adenocarcinoma, NOS	Dead (missing/unknown COD)	Dead (missing/unknown COD)
29435035	2	1	1	T3	T2	2	N1	0	unknown	unknown	2	0	1	0	0	1	0	1	2	1	8140/3: Adenocarcinoma, NOS	Dead (attributable to this cancer dx)	Alive or dead due to cancer
30414605	2	1	2	T4	T4	3	N0	0	unknown	unknown	1	0	0	0	0	1	0	0	2	1	8140/3: Adenocarcinoma, NOS	N/A not first tumor	N/A not first tumor
31455539	1	1	1	T2	T3	3	N1	0	2	2	1	1	1	0	0	0	0	1	28	1	8480/3: Mucinous adenocarcinoma	Dead (attributable to this cancer dx)	Alive or dead due to cancer
31469254	2	1	1	T3	T3	3	N1	0	unknown	unknown	2	0	0	0	0	1	1	1	1	1	8140/3: Adenocarcinoma, NOS	Dead (missing/unknown COD)	Dead (missing/unknown COD)
31496633	2	1	2	T2	T2	2	N0	0	unknown	unknown	2	0	1	0	0	0	1	0	2	1	8480/3: Mucinous adenocarcinoma	N/A not first tumor	N/A not first tumor
31890206	2	1	1	T2	T3	3	N1	0	unknown	unknown	2	0	1	0	0	1	0	1	23	1	8140/3: Adenocarcinoma, NOS	Dead (attributable to this cancer dx)	Alive or dead due to cancer
31894099	1	1	1	T3	T1	1	N0	0	2	2	1	0	1	1	0	0	0	1	18	1	8140/3: Adenocarcinoma, NOS	Dead (attributable to this cancer dx)	Alive or dead due to cancer
31896322	1	1	1	T2	T2	2	N0	0	unknown	unknown	2	0	1	0	0	1	0	1	4	1	8140/3: Adenocarcinoma, NOS	Dead (attributable to this cancer dx)	Alive or dead due to cancer
31923352	2	1	1	T3	T3	3	N0	0	unknown	unknown	2	0	1	1	0	1	1	1	16	1	8140/3: Adenocarcinoma, NOS	Dead (attributable to this cancer dx)	Alive or dead due to cancer
31943985	1	1	1	T3	T3	3	N1	1	unknown	unknown	2	0	1	0	0	1	0	1	22	0	8240/3: Carcinoid tumor, NOS	Alive or dead of other cause	Alive or dead due to cancer
31946251	1	1	2	T1	T1	1	N0	0	unknown	unknown	3	0	1	0	0	1	0	0	22	0	8240/3: Carcinoid tumor, NOS	N/A not first tumor	N/A not first tumor
31953028	2	3	1	T4	T4	2	N0	0	unknown	unknown	3	0	1	0	0	0	0	1	19	0	8140/3: Adenocarcinoma, NOS	Alive or dead of other cause	Alive or dead due to cancer
31953097	1	1	1	T3	T3	3	N0	0	unknown	unknown	1	0	1	0	0	1	1	1	17	0	8140/3: Adenocarcinoma, NOS	Alive or dead of other cause	Alive or dead due to cancer
31953440	2	3	1	T3	T2	2	N0	0	unknown	unknown	2	0	1	0	0	1	0	1	4	1	8140/3: Adenocarcinoma, NOS	Dead (attributable to this cancer dx)	Alive or dead due to cancer
31955668	2	1	1	T2	T2	2	N0	0	2	2	1	0	1	1	0	1	0	1	18	0	8246/3: Neuroendocrine carcinoma, NOS	Alive or dead of other cause	Alive or dead due to cancer
31967429	1	1	1	T4	T4	2	N0	0	unknown	unknown	2	0	1	0	0	1	0	1	8	0	8140/3: Adenocarcinoma, NOS	Alive or dead of other cause	Alive or dead due to cancer
31979103	2	1	1	T4	T4	3	N0	0	2	2	1	0	1	0	0	1	0	1	8	1	8140/3: Adenocarcinoma, NOS	Dead (attributable to this cancer dx)	Alive or dead due to cancer
31989651	2	1	2	T2	T3	3	N1	0	unknown	unknown	2	0	1	0	0	1	0	1	11	1	8140/3: Adenocarcinoma, NOS	Dead (attributable to this cancer dx)	Alive or dead due to cancer
31989796	2	1	2	T2	T3	3	N0	0	unknown	unknown	3	0	1	0	0	1	0	0	2	1	8022/3: Pleomorphic carcinoma	N/A not first tumor	N/A not first tumor
31992347	2	1	2	T4	T4	3	N0	0	2	2	3	0	1	0	0	0	0	1	7	1	8140/3: Adenocarcinoma, NOS	Dead (attributable to this cancer dx)	Alive or dead due to cancer
31993723	1	1	1	T3	T3	3	N1	1	2	2	2	0	1	0	0	1	0	1	11	0	8246/3: Neuroendocrine carcinoma, NOS	Alive or dead of other cause	Alive or dead due to cancer
32588663	2	1	2	T4	T4	2	N0	0	unknown	unknown	1	0	0	0	0	1	0	0	2	1	8140/3: Adenocarcinoma, NOS	N/A not first tumor	N/A not first tumor
32959239	1	1	2	T3	T2	2	N1	0	unknown	unknown	1	0	1	0	0	1	0	0	14	1	8140/3: Adenocarcinoma, NOS	N/A not first tumor	N/A not first tumor
32984003	2	1	1	T3	T3	3	N0	0	unknown	unknown	3	0	0	0	0	1	0	0	3	1	8140/3: Adenocarcinoma, NOS	N/A not first tumor	N/A not first tumor
32985013	2	1	1	T4	T4	3	N0	0	unknown	unknown	3	0	1	0	0	1	0	0	29	1	8310/3: Clear cell adenocarcinoma, NOS	N/A not first tumor	N/A not first tumor
33026515	2	1	1	T2	T3	3	N1	0	unknown	unknown	2	1	1	0	0	1	0	0	45	0	8246/3: Neuroendocrine carcinoma, NOS	N/A not first tumor	N/A not first tumor
33513616	1	1	1	T4	T4	3	N0	0	unknown	unknown	1	0	1	0	0	1	0	1	82	0	8246/3: Neuroendocrine carcinoma, NOS	Alive or dead of other cause	Alive or dead due to cancer
33532736	2	1	2	T2	T2	2	N0	0	2	2	1	0	0	0	0	1	0	1	4	1	8140/3: Adenocarcinoma, NOS	Dead (attributable to this cancer dx)	Alive or dead due to cancer
33533995	2	1	2	T2	T2	2	N0	0	unknown	unknown	3	0	1	0	0	1	0	1	3	1	8140/3: Adenocarcinoma, NOS	Dead (attributable to this cancer dx)	Alive or dead due to cancer
33534779	2	1	1	T3	T3	3	N0	0	2	2	1	0	1	0	0	1	0	1	1	1	8140/3: Adenocarcinoma, NOS	Dead (attributable to this cancer dx)	Alive or dead due to cancer
33853421	2	1	2	T3	T2	2	N1	0	unknown	unknown	1	0	1	0	0	1	0	1	11	1	8140/3: Adenocarcinoma, NOS	Dead (missing/unknown COD)	Dead (missing/unknown COD)
33853479	1	1	1	T4	T4	3	N1	0	unknown	unknown	2	0	1	0	0	1	0	1	1	1	8010/3: Carcinoma, NOS	Dead (attributable to this cancer dx)	Alive or dead due to cancer
33865501	2	1	1	T4	T4	3	N1	0	unknown	unknown	2	0	1	0	0	1	0	1	29	1	8140/3: Adenocarcinoma, NOS	Dead (attributable to this cancer dx)	Alive or dead due to cancer
33875934	2	1	1	T3	T3	3	N1	0	unknown	unknown	3	1	1	1	0	0	0	1	17	1	8140/3: Adenocarcinoma, NOS	Dead (attributable to this cancer dx)	Alive or dead due to cancer
33876118	2	1	1	T2	T2	2	N0	1	unknown	unknown	1	0	1	0	0	1	0	1	21	1	8140/3: Adenocarcinoma, NOS	Dead (attributable to this cancer dx)	Alive or dead due to cancer
33876998	1	1	1	T4	T4	3	N1	0	unknown	unknown	2	0	1	1	0	1	0	1	8	1	8140/3: Adenocarcinoma, NOS	Dead (attributable to this cancer dx)	Alive or dead due to cancer
33879992	2	1	1	T3	T1	1	N0	0	unknown	unknown	1	0	1	0	0	1	0	1	4	1	8140/3: Adenocarcinoma, NOS	Dead (missing/unknown COD)	Dead (missing/unknown COD)
33883824	2	1	2	T2	T2	2	N1	0	2	2	1	0	0	0	0	0	1	1	1	1	8140/3: Adenocarcinoma, NOS	Dead (attributable to this cancer dx)	Alive or dead due to cancer
33883899	2	1	1	T3	T3	3	N0	0	2	2	2	0	0	0	0	1	1	1	1	1	8140/3: Adenocarcinoma, NOS	Dead (attributable to this cancer dx)	Alive or dead due to cancer
33887408	2	1	1	T3	T3	3	N1	0	unknown	unknown	3	0	1	0	0	1	1	1	4	1	8140/3: Adenocarcinoma, NOS	Dead (attributable to this cancer dx)	Alive or dead due to cancer
33887490	2	1	2	T4	T4	2	N1	0	unknown	unknown	1	0	1	0	0	1	0	1	9	1	8140/3: Adenocarcinoma, NOS	Dead (attributable to this cancer dx)	Alive or dead due to cancer
33887575	2	1	2	T4	T4	2	N1	0	3	3	1	0	0	0	0	0	1	1	3	1	8140/3: Adenocarcinoma, NOS	Dead (attributable to this cancer dx)	Alive or dead due to cancer
33888183	2	1	2	T3	T2	2	N1	0	unknown	unknown	1	0	1	0	0	1	0	1	1	1	8140/3: Adenocarcinoma, NOS	Dead (attributable to this cancer dx)	Alive or dead due to cancer
33888335	2	1	2	T3	T2	2	N1	0	2	2	1	0	0	0	0	0	0	1	1	1	8140/3: Adenocarcinoma, NOS	Alive or dead of other cause	Dead (attributable to causes other than this cancer dx)
33893888	1	1	1	T2	T2	2	N0	0	3	3	1	0	1	0	0	1	0	1	27	1	8246/3: Neuroendocrine carcinoma, NOS	Dead (attributable to this cancer dx)	Alive or dead due to cancer
33894031	2	1	2	T2	T2	2	N1	0	unknown	unknown	2	0	1	0	0	1	0	1	7	1	8140/3: Adenocarcinoma, NOS	Dead (attributable to this cancer dx)	Alive or dead due to cancer
33896554	2	1	1	T2	T2	2	N0	0	unknown	unknown	2	0	1	0	0	1	1	1	2	1	8154/3: Mixed pancreatic endocrine and exocrine tumor, malignant	Dead (attributable to this cancer dx)	Alive or dead due to cancer
33896971	1	1	1	T4	T4	3	N0	0	unknown	unknown	3	1	1	1	0	0	0	1	3	1	8140/3: Adenocarcinoma, NOS	Dead (attributable to this cancer dx)	Alive or dead due to cancer
33897347	2	1	2	T3	T3	3	N0	0	unknown	unknown	1	0	1	0	0	0	1	1	4	1	8140/3: Adenocarcinoma, NOS	Dead (attributable to this cancer dx)	Alive or dead due to cancer
33902071	2	1	2	T3	T2	2	N1	0	unknown	unknown	1	1	1	0	0	0	1	1	3	1	8140/3: Adenocarcinoma, NOS	Alive or dead of other cause	Dead (attributable to causes other than this cancer dx)
33902108	1	1	1	T3	T3	3	N1	1	4	3	3	0	0	0	0	0	0	1	3	1	8020/3: Carcinoma, undifferentiated, NOS	Dead (attributable to this cancer dx)	Alive or dead due to cancer
33903416	2	1	2	T4	T4	2	N1	1	1	1	2	0	0	0	0	1	0	1	3	1	8140/3: Adenocarcinoma, NOS	Dead (attributable to this cancer dx)	Alive or dead due to cancer
33905296	2	1	1	T3	T2	2	N0	0	2	2	1	0	1	0	0	0	0	1	22	1	8140/3: Adenocarcinoma, NOS	Dead (attributable to this cancer dx)	Alive or dead due to cancer
33905309	1	1	1	T3	T2	2	N1	0	2	2	1	0	1	0	0	1	0	1	3	1	8140/3: Adenocarcinoma, NOS	Dead (attributable to this cancer dx)	Alive or dead due to cancer
33908262	2	1	1	T3	T3	3	N1	0	2	2	2	0	1	0	0	1	1	1	2	1	8140/3: Adenocarcinoma, NOS	Dead (attributable to this cancer dx)	Alive or dead due to cancer
33911255	2	1	1	T2	T3	3	N0	0	unknown	unknown	1	0	1	0	0	1	0	1	24	1	8140/3: Adenocarcinoma, NOS	Dead (attributable to this cancer dx)	Alive or dead due to cancer
33912590	1	1	1	T3	T3	3	N1	0	unknown	unknown	2	1	0	1	0	1	1	1	1	1	8140/3: Adenocarcinoma, NOS	Dead (attributable to this cancer dx)	Alive or dead due to cancer
33913023	2	1	1	T2	T3	3	N0	0	2	2	3	0	1	0	0	1	0	1	1	1	8140/3: Adenocarcinoma, NOS	Dead (attributable to this cancer dx)	Alive or dead due to cancer
33917503	2	1	2	T2	T3	3	N0	0	unknown	unknown	2	0	1	0	0	1	0	1	1	1	8140/3: Adenocarcinoma, NOS	Dead (attributable to this cancer dx)	Alive or dead due to cancer
33920048	2	1	1	T4	T4	3	N1	0	3	3	2	0	1	0	0	0	0	1	1	1	8140/3: Adenocarcinoma, NOS	Dead (attributable to this cancer dx)	Alive or dead due to cancer
33922626	2	1	1	T2	T2	2	N1	0	3	3	3	0	1	1	0	1	1	0	1	1	8140/3: Adenocarcinoma, NOS	N/A not first tumor	N/A not first tumor
33924102	2	1	1	T2	T3	3	N0	0	unknown	unknown	2	0	1	0	0	1	1	1	5	1	8140/3: Adenocarcinoma, NOS	Dead (attributable to this cancer dx)	Alive or dead due to cancer
33924240	2	1	2	T4	T4	3	N0	0	unknown	unknown	2	0	1	0	0	0	0	1	12	1	8140/3: Adenocarcinoma, NOS	Alive or dead of other cause	Dead (attributable to causes other than this cancer dx)
33925893	2	1	2	T2	T2	2	N0	0	unknown	unknown	2	0	0	0	0	1	0	1	4	1	8246/3: Neuroendocrine carcinoma, NOS	Dead (attributable to this cancer dx)	Alive or dead due to cancer
33927219	2	1	2	T4	T4	3	N0	0	1	1	3	0	0	0	0	1	0	1	1	0	8140/3: Adenocarcinoma, NOS	Alive or dead of other cause	Alive or dead due to cancer
33932130	2	1	2	T4	T4	2	N0	0	unknown	unknown	2	0	0	0	0	1	0	1	12	1	8140/3: Adenocarcinoma, NOS	Dead (attributable to this cancer dx)	Alive or dead due to cancer
33932383	2	1	1	T3	T2	2	N1	0	unknown	unknown	1	0	0	0	0	1	0	0	2	1	8140/3: Adenocarcinoma, NOS	N/A not first tumor	N/A not first tumor
33933050	2	1	2	T3	T2	2	N0	0	unknown	unknown	2	1	1	0	0	0	1	1	12	1	8481/3: Mucin-producing adenocarcinoma	Dead (attributable to this cancer dx)	Alive or dead due to cancer
33935610	2	1	1	T3	T3	3	N1	0	unknown	unknown	2	0	0	1	0	1	1	1	2	1	8140/3: Adenocarcinoma, NOS	Dead (attributable to this cancer dx)	Alive or dead due to cancer
33939011	1	1	1	T3	T2	2	N1	0	unknown	unknown	1	0	1	0	0	1	0	1	9	1	8140/3: Adenocarcinoma, NOS	Dead (attributable to this cancer dx)	Alive or dead due to cancer
33943738	2	1	2	T4	T4	2	N0	0	unknown	unknown	2	0	0	0	0	1	1	1	1	0	8140/3: Adenocarcinoma, NOS	Alive or dead of other cause	Alive or dead due to cancer
33945052	1	1	1	T4	T4	3	N1	0	unknown	unknown	3	0	1	0	0	1	0	1	2	1	8140/3: Adenocarcinoma, NOS	Dead (attributable to this cancer dx)	Alive or dead due to cancer
33945348	1	1	2	T2	T2	2	N1	0	unknown	unknown	1	1	1	0	0	1	0	1	7	1	8140/3: Adenocarcinoma, NOS	Dead (attributable to this cancer dx)	Alive or dead due to cancer
33945746	2	1	2	T4	T4	3	N0	0	unknown	unknown	3	0	0	0	0	1	0	1	2	1	8140/3: Adenocarcinoma, NOS	Dead (attributable to this cancer dx)	Alive or dead due to cancer
33945779	2	1	1	T2	T3	3	N0	0	unknown	unknown	3	0	1	0	0	1	0	1	1	1	8140/3: Adenocarcinoma, NOS	Dead (attributable to this cancer dx)	Alive or dead due to cancer
33947606	2	1	1	T1	T1	1	N1	0	unknown	unknown	1	0	0	0	0	1	1	1	2	1	8140/3: Adenocarcinoma, NOS	Dead (attributable to this cancer dx)	Alive or dead due to cancer
34420403	2	1	2	T2	T3	3	N0	0	unknown	unknown	3	0	1	0	0	1	0	0	4	1	8140/3: Adenocarcinoma, NOS	N/A not first tumor	N/A not first tumor
34501317	1	1	2	T4	T4	3	N0	0	3	3	3	0	1	0	0	1	0	0	11	1	8510/3: Medullary carcinoma, NOS	N/A not first tumor	N/A not first tumor
34548748	2	1	1	T4	T4	1	N0	0	unknown	unknown	3	0	0	0	0	1	0	0	8	1	8140/3: Adenocarcinoma, NOS	N/A not first tumor	N/A not first tumor
34550125	2	1	1	T2	T2	2	N0	0	3	3	2	0	1	0	0	1	0	0	3	1	8010/3: Carcinoma, NOS	N/A not first tumor	N/A not first tumor
34964432	2	1	2	T3	T3	3	N0	0	3	3	2	0	0	0	0	1	0	0	1	1	8140/3: Adenocarcinoma, NOS	N/A not first tumor	N/A not first tumor
34965351	2	1	1	T3	T2	2	N0	0	unknown	unknown	2	0	1	0	0	1	0	0	3	1	8140/3: Adenocarcinoma, NOS	N/A not first tumor	N/A not first tumor
36084423	1	1	1	T4	T4	3	N0	0	3	3	1	0	1	0	0	0	1	0	14	1	8140/3: Adenocarcinoma, NOS	N/A not first tumor	N/A not first tumor
36102484	2	1	2	T3	T2	2	N0	0	3	3	1	0	1	0	0	1	0	0	3	1	8140/3: Adenocarcinoma, NOS	N/A not first tumor	N/A not first tumor
36191067	2	1	1	T2	T2	2	N0	0	unknown	unknown	2	0	1	0	0	1	0	0	3	1	8140/3: Adenocarcinoma, NOS	N/A not first tumor	N/A not first tumor
36729938	2	1	2	T2	T3	3	N1	0	unknown	unknown	1	0	0	0	0	1	0	0	2	1	8500/3: Infiltrating duct carcinoma, NOS	N/A not first tumor	N/A not first tumor
37187788	2	1	1	T2	T3	3	N0	0	1	1	3	0	0	0	0	1	0	0	17	0	8246/3: Neuroendocrine carcinoma, NOS	N/A not first tumor	N/A not first tumor
38294619	2	1	1	T4	T4	3	N0	0	unknown	unknown	1	0	0	0	0	1	0	0	1	1	8140/3: Adenocarcinoma, NOS	N/A not first tumor	N/A not first tumor
38295700	1	1	2	T1	T1	1	N0	0	unknown	unknown	2	0	1	0	0	1	0	0	20	1	8246/3: Neuroendocrine carcinoma, NOS	N/A not first tumor	N/A not first tumor
38295915	2	1	1	T3	T3	3	N0	0	unknown	unknown	1	0	1	0	0	1	0	0	13	0	8140/3: Adenocarcinoma, NOS	N/A not first tumor	N/A not first tumor
38306200	2	1	2	T3	T2	2	N1	0	unknown	unknown	3	0	0	0	0	0	0	0	3	1	8140/3: Adenocarcinoma, NOS	N/A not first tumor	N/A not first tumor
38359890	2	1	2	T2	T2	2	N0	0	unknown	unknown	2	0	0	0	0	1	1	0	1	1	8500/3: Infiltrating duct carcinoma, NOS	N/A not first tumor	N/A not first tumor
38831101	2	1	2	T1	T1	1	N1	0	2	2	1	0	0	0	0	0	0	0	1	1	8140/3: Adenocarcinoma, NOS	N/A not first tumor	N/A not first tumor
39335591	2	1	1	T2	T2	2	N0	0	unknown	unknown	2	0	0	0	0	1	0	0	17	1	8140/3: Adenocarcinoma, NOS	N/A not first tumor	N/A not first tumor
39399171	2	1	2	T4	T4	3	N0	0	unknown	unknown	3	0	1	0	0	1	1	1	5	1	8140/3: Adenocarcinoma, NOS	Dead (attributable to this cancer dx)	Alive or dead due to cancer
39406001	2	1	1	T2	T3	3	N1	0	unknown	unknown	3	0	1	0	0	1	0	1	8	1	8140/3: Adenocarcinoma, NOS	Dead (attributable to this cancer dx)	Alive or dead due to cancer
39411892	1	1	1	T2	T3	3	N0	0	unknown	unknown	3	0	0	0	0	1	0	1	4	1	8140/3: Adenocarcinoma, NOS	Dead (missing/unknown COD)	Dead (missing/unknown COD)
39412415	2	1	2	T3	T3	3	N1	0	unknown	unknown	1	0	1	0	0	1	1	1	10	1	8140/3: Adenocarcinoma, NOS	Dead (attributable to this cancer dx)	Alive or dead due to cancer
39414029	1	1	1	T3	T3	3	N1	0	3	3	3	0	1	0	0	0	0	1	7	1	8500/3: Infiltrating duct carcinoma, NOS	Dead (attributable to this cancer dx)	Alive or dead due to cancer
39420195	1	1	2	T4	T4	2	N0	0	unknown	unknown	1	0	1	0	0	1	0	1	6	1	8140/3: Adenocarcinoma, NOS	Dead (attributable to this cancer dx)	Alive or dead due to cancer
39421958	1	1	1	T3	T1	1	N0	0	unknown	unknown	1	0	1	0	0	1	0	1	6	1	8140/3: Adenocarcinoma, NOS	Dead (attributable to this cancer dx)	Alive or dead due to cancer
39424138	2	1	2	T2	T3	3	N0	0	unknown	unknown	2	0	0	0	0	1	0	1	1	1	8140/3: Adenocarcinoma, NOS	Dead (attributable to this cancer dx)	Alive or dead due to cancer
39427114	2	1	2	T3	T3	3	N1	0	3	3	2	0	1	1	0	1	1	1	1	1	8010/3: Carcinoma, NOS	Alive or dead of other cause	Dead (attributable to causes other than this cancer dx)
39428246	2	1	1	T3	T3	3	N0	0	2	2	3	0	0	0	0	1	0	1	1	1	8140/3: Adenocarcinoma, NOS	Dead (attributable to this cancer dx)	Alive or dead due to cancer
39433954	1	1	1	T3	T3	3	N1	0	unknown	unknown	1	0	0	1	0	0	0	1	1	1	8140/3: Adenocarcinoma, NOS	Dead (attributable to this cancer dx)	Alive or dead due to cancer
39439059	2	1	2	T3	T2	2	N0	0	unknown	unknown	1	0	1	0	0	0	0	1	6	1	8140/3: Adenocarcinoma, NOS	Dead (attributable to this cancer dx)	Alive or dead due to cancer
39439784	2	1	1	T3	T2	2	N0	0	unknown	unknown	1	0	0	0	0	0	1	1	1	1	8140/3: Adenocarcinoma, NOS	Dead (attributable to this cancer dx)	Alive or dead due to cancer
39440034	2	1	2	T3	T2	2	N1	0	unknown	unknown	2	0	1	0	0	1	0	1	14	1	8246/3: Neuroendocrine carcinoma, NOS	Dead (attributable to this cancer dx)	Alive or dead due to cancer
39446344	1	1	2	T3	T2	2	N1	0	unknown	unknown	1	0	1	0	0	1	0	1	9	1	8140/3: Adenocarcinoma, NOS	Dead (attributable to this cancer dx)	Alive or dead due to cancer
39452218	1	1	2	T4	T4	3	N0	0	unknown	unknown	1	0	0	0	0	1	1	1	1	1	8033/3: Pseudosarcomatous carcinoma	Dead (attributable to this cancer dx)	Alive or dead due to cancer
39452222	2	1	2	T3	T3	3	N0	0	unknown	unknown	1	0	0	0	0	1	0	1	2	1	8140/3: Adenocarcinoma, NOS	Dead (attributable to this cancer dx)	Alive or dead due to cancer
39457132	1	1	1	T3	T2	2	N1	0	3	3	1	0	1	0	0	0	0	1	12	1	8480/3: Mucinous adenocarcinoma	Dead (attributable to this cancer dx)	Alive or dead due to cancer
39459100	1	1	1	T1	T1	1	N0	0	unknown	unknown	1	0	1	0	0	1	0	0	10	1	8140/3: Adenocarcinoma, NOS	N/A not first tumor	N/A not first tumor
39465807	2	1	1	T2	T3	3	N0	0	unknown	unknown	1	0	0	0	0	1	0	0	1	1	8010/3: Carcinoma, NOS	N/A not first tumor	N/A not first tumor
39474217	2	1	1	T2	T2	2	N0	0	unknown	unknown	1	0	0	1	0	0	0	1	1	1	8140/3: Adenocarcinoma, NOS	Dead (attributable to this cancer dx)	Alive or dead due to cancer
39474707	2	1	1	T3	T2	2	N1	0	unknown	unknown	1	0	0	0	0	1	0	1	2	1	8140/3: Adenocarcinoma, NOS	Dead (attributable to this cancer dx)	Alive or dead due to cancer
39474708	1	1	1	T4	T4	3	N1	0	1	1	3	0	0	0	0	1	0	1	1	1	8140/3: Adenocarcinoma, NOS	Dead (attributable to this cancer dx)	Alive or dead due to cancer
39478787	2	1	2	T3	T3	3	N1	0	unknown	unknown	1	0	0	0	0	0	1	1	16	1	8140/3: Adenocarcinoma, NOS	Dead (attributable to this cancer dx)	Alive or dead due to cancer
39862954	2	1	2	T2	T2	2	N1	0	3	3	1	0	1	0	0	1	0	1	12	1	8481/3: Mucin-producing adenocarcinoma	Dead (attributable to this cancer dx)	Alive or dead due to cancer
39865231	2	1	1	T4	T4	3	N0	0	unknown	unknown	1	0	1	0	0	1	0	1	4	1	8140/3: Adenocarcinoma, NOS	Dead (attributable to this cancer dx)	Alive or dead due to cancer
39869923	2	1	2	T4	T4	2	N1	0	unknown	unknown	2	0	1	0	0	1	0	1	7	1	8140/3: Adenocarcinoma, NOS	Dead (attributable to this cancer dx)	Alive or dead due to cancer
39875825	2	1	2	T2	T3	3	N0	0	unknown	unknown	1	0	1	0	0	1	0	1	5	1	8500/3: Infiltrating duct carcinoma, NOS	Dead (attributable to this cancer dx)	Alive or dead due to cancer
39881608	1	1	1	T2	T2	2	N1	0	4	3	2	0	0	0	0	0	0	1	3	0	8246/3: Neuroendocrine carcinoma, NOS	Alive or dead of other cause	Alive or dead due to cancer
39881883	2	1	2	T3	T2	2	N1	0	unknown	unknown	1	0	0	0	0	0	0	1	18	1	8140/3: Adenocarcinoma, NOS	Dead (attributable to this cancer dx)	Alive or dead due to cancer
39891659	2	1	1	T4	T4	2	N0	0	3	3	1	0	0	0	0	1	0	1	3	1	8140/3: Adenocarcinoma, NOS	Dead (attributable to this cancer dx)	Alive or dead due to cancer
39891847	2	1	2	T3	T3	3	N0	0	3	3	3	0	1	0	0	1	0	1	2	1	8140/3: Adenocarcinoma, NOS	Dead (attributable to this cancer dx)	Alive or dead due to cancer
39892472	1	1	2	T4	T4	3	N0	0	unknown	unknown	1	0	0	0	0	0	0	1	5	1	8140/3: Adenocarcinoma, NOS	Dead (attributable to this cancer dx)	Alive or dead due to cancer
39894678	2	1	1	T2	T3	3	N0	0	3	3	3	0	1	0	0	1	1	1	2	1	8140/3: Adenocarcinoma, NOS	Alive or dead of other cause	Dead (attributable to causes other than this cancer dx)
39894834	1	1	1	T3	T2	2	N0	0	unknown	unknown	2	0	1	1	0	1	1	1	3	1	8140/3: Adenocarcinoma, NOS	Dead (attributable to this cancer dx)	Alive or dead due to cancer
39895371	2	1	1	T4	T4	3	N0	0	2	2	1	0	1	0	0	1	0	1	14	1	8140/3: Adenocarcinoma, NOS	Dead (attributable to this cancer dx)	Alive or dead due to cancer
39896541	2	1	1	T3	T3	3	N0	0	3	3	2	0	0	0	0	1	0	1	1	1	8010/3: Carcinoma, NOS	Dead (attributable to this cancer dx)	Alive or dead due to cancer
39897637	2	1	1	T3	T3	3	N0	0	2	2	2	0	1	1	0	0	0	1	8	1	8140/3: Adenocarcinoma, NOS	Dead (attributable to this cancer dx)	Alive or dead due to cancer
39899371	2	1	1	T2	T3	3	N1	0	unknown	unknown	3	0	1	0	0	1	0	1	1	1	8140/3: Adenocarcinoma, NOS	Dead (attributable to this cancer dx)	Alive or dead due to cancer
39900287	2	1	1	T4	T4	3	N0	0	unknown	unknown	1	0	0	1	0	0	0	1	3	1	8180/3: Combined hepatocellular carcinoma and cholangiocarcinoma	Dead (attributable to this cancer dx)	Alive or dead due to cancer
39902833	2	1	1	T2	T3	3	N0	0	2	2	1	0	0	0	0	1	0	1	9	1	8140/3: Adenocarcinoma, NOS	Dead (attributable to this cancer dx)	Alive or dead due to cancer
39905387	2	1	2	T2	T3	3	N0	0	unknown	unknown	1	0	1	0	0	1	1	1	4	1	8140/3: Adenocarcinoma, NOS	Dead (attributable to this cancer dx)	Alive or dead due to cancer
39909030	1	1	2	T3	T3	3	N0	0	unknown	unknown	2	1	1	0	0	0	0	1	3	1	8480/3: Mucinous adenocarcinoma	Dead (attributable to this cancer dx)	Alive or dead due to cancer
39910894	2	1	2	T4	T4	3	N0	0	3	3	2	0	1	0	0	1	0	1	3	1	8140/3: Adenocarcinoma, NOS	Dead (attributable to this cancer dx)	Alive or dead due to cancer
39911092	1	1	1	T3	T3	3	N1	0	3	3	3	1	0	0	0	1	0	1	4	1	8246/3: Neuroendocrine carcinoma, NOS	Dead (attributable to this cancer dx)	Alive or dead due to cancer
39913746	1	1	1	T4	T4	3	N1	0	unknown	unknown	1	0	1	0	0	1	0	1	1	1	8560/3: Adenosquamous carcinoma	Dead (attributable to this cancer dx)	Alive or dead due to cancer
39914044	1	1	2	T4	T4	2	N0	0	unknown	unknown	1	0	1	0	0	1	0	1	17	1	8140/3: Adenocarcinoma, NOS	Dead (attributable to this cancer dx)	Alive or dead due to cancer
39915178	1	1	2	T2	T2	2	N1	0	3	3	3	0	0	0	0	1	0	1	2	1	8140/3: Adenocarcinoma, NOS	Dead (attributable to this cancer dx)	Alive or dead due to cancer
39917353	2	1	2	T4	T4	3	N1	0	unknown	unknown	2	0	0	0	0	1	1	1	1	1	8140/3: Adenocarcinoma, NOS	Dead (attributable to this cancer dx)	Alive or dead due to cancer
39923284	2	1	1	T3	T3	3	N1	0	unknown	unknown	2	0	1	0	0	1	0	1	13	1	8140/3: Adenocarcinoma, NOS	Dead (attributable to this cancer dx)	Alive or dead due to cancer
39923293	1	1	1	T4	T4	1	N1	0	2	2	1	0	1	0	0	1	0	1	12	1	8140/3: Adenocarcinoma, NOS	Dead (attributable to this cancer dx)	Alive or dead due to cancer
39925851	2	1	1	T2	T3	3	N0	0	unknown	unknown	3	0	1	0	0	1	1	1	3	1	8140/3: Adenocarcinoma, NOS	Dead (attributable to this cancer dx)	Alive or dead due to cancer
39928960	2	1	2	T4	T4	2	N0	0	unknown	unknown	2	0	1	0	0	0	1	1	8	1	8140/3: Adenocarcinoma, NOS	Dead (attributable to this cancer dx)	Alive or dead due to cancer
39935101	2	1	2	T3	T3	3	N1	1	unknown	unknown	3	0	0	0	0	1	0	1	5	1	8140/3: Adenocarcinoma, NOS	Dead (attributable to this cancer dx)	Alive or dead due to cancer
39936344	2	1	1	T2	T3	3	N1	0	unknown	unknown	3	0	1	0	0	0	0	1	5	1	8140/3: Adenocarcinoma, NOS	Dead (attributable to this cancer dx)	Alive or dead due to cancer
39937321	1	1	1	T3	T3	3	N1	0	unknown	unknown	2	0	1	0	0	1	0	1	10	1	8140/3: Adenocarcinoma, NOS	Dead (attributable to this cancer dx)	Alive or dead due to cancer
39940972	2	1	2	T2	T3	3	N1	0	3	3	2	0	1	0	0	1	0	1	3	1	8140/3: Adenocarcinoma, NOS	Dead (attributable to this cancer dx)	Alive or dead due to cancer
39941468	2	1	2	T3	T2	2	N1	1	2	2	1	0	1	0	0	1	0	1	3	1	8500/3: Infiltrating duct carcinoma, NOS	Dead (attributable to this cancer dx)	Alive or dead due to cancer
39941788	2	1	1	T3	T2	2	N0	0	2	2	1	0	0	0	0	1	1	1	5	1	8140/3: Adenocarcinoma, NOS	Dead (attributable to this cancer dx)	Alive or dead due to cancer
39947634	2	1	1	T2	T3	3	N0	0	unknown	unknown	3	0	1	0	0	1	0	1	5	1	8140/3: Adenocarcinoma, NOS	Dead (attributable to this cancer dx)	Alive or dead due to cancer
39948343	2	1	2	T4	T4	2	N0	0	2	2	1	0	0	0	0	1	0	1	1	1	8140/3: Adenocarcinoma, NOS	Dead (attributable to this cancer dx)	Alive or dead due to cancer
39948870	2	1	2	T2	T3	3	N0	0	unknown	unknown	1	0	1	0	0	1	1	1	2	1	8140/3: Adenocarcinoma, NOS	Dead (attributable to this cancer dx)	Alive or dead due to cancer
39949014	2	1	2	T4	T4	3	N1	0	2	2	1	0	0	0	0	1	0	1	4	1	8140/3: Adenocarcinoma, NOS	Dead (attributable to this cancer dx)	Alive or dead due to cancer
39955407	2	2	2	T1	T1	1	N0	0	unknown	unknown	1	0	1	0	0	1	0	1	11	1	8140/3: Adenocarcinoma, NOS	Dead (attributable to this cancer dx)	Alive or dead due to cancer
39958717	2	1	2	T4	T4	2	N0	0	unknown	unknown	3	0	1	0	0	1	0	1	5	1	8140/3: Adenocarcinoma, NOS	Dead (attributable to this cancer dx)	Alive or dead due to cancer
39959276	2	1	2	T2	T2	2	N0	0	unknown	unknown	1	0	0	0	0	1	0	1	1	1	8140/3: Adenocarcinoma, NOS	Dead (attributable to this cancer dx)	Alive or dead due to cancer
39959490	2	1	2	T3	T3	3	N1	0	unknown	unknown	1	0	0	0	0	1	0	1	1	1	8010/3: Carcinoma, NOS	Dead (attributable to this cancer dx)	Alive or dead due to cancer
39959672	2	1	1	T3	T3	3	N1	0	unknown	unknown	1	0	1	0	0	1	0	1	5	1	8560/3: Adenosquamous carcinoma	Dead (attributable to this cancer dx)	Alive or dead due to cancer
39962304	2	1	1	T3	T3	3	N1	0	3	3	2	1	1	0	0	1	0	1	3	1	8140/3: Adenocarcinoma, NOS	Dead (attributable to this cancer dx)	Alive or dead due to cancer
39963215	1	1	1	T2	T3	3	N0	0	unknown	unknown	3	0	1	0	0	1	1	1	2	1	8140/3: Adenocarcinoma, NOS	Dead (attributable to this cancer dx)	Alive or dead due to cancer
39963865	1	1	1	T4	T4	3	N1	0	3	3	2	0	0	0	0	1	0	1	1	1	8140/3: Adenocarcinoma, NOS	Dead (attributable to this cancer dx)	Alive or dead due to cancer
39970134	2	1	1	T3	T3	3	N0	1	1	1	2	0	1	0	0	1	0	0	7	1	8151/3: Insulinoma, malignant	N/A not first tumor	N/A not first tumor
39970381	2	1	2	T3	T3	3	N0	0	3	3	1	0	1	0	0	0	1	1	20	1	8500/3: Infiltrating duct carcinoma, NOS	Dead (attributable to this cancer dx)	Alive or dead due to cancer
39978261	1	1	2	T2	T2	2	N1	0	unknown	unknown	1	0	0	0	0	1	0	1	25	0	8140/3: Adenocarcinoma, NOS	Alive or dead of other cause	Alive or dead due to cancer
39985466	2	1	2	T2	T3	3	N0	0	3	3	1	0	0	0	0	1	0	1	1	1	8140/3: Adenocarcinoma, NOS	Dead (attributable to this cancer dx)	Alive or dead due to cancer
39986009	2	1	2	T4	T4	2	N0	0	unknown	unknown	2	0	1	0	0	0	0	1	28	1	8140/3: Adenocarcinoma, NOS	Dead (attributable to this cancer dx)	Alive or dead due to cancer
39988509	2	1	2	T4	T4	2	N1	0	2	2	3	0	1	0	0	0	0	1	8	1	8140/3: Adenocarcinoma, NOS	Dead (attributable to this cancer dx)	Alive or dead due to cancer
39991750	2	1	1	T4	T4	2	N1	0	3	3	3	0	1	0	0	1	0	1	5	1	8140/3: Adenocarcinoma, NOS	Dead (attributable to this cancer dx)	Alive or dead due to cancer
39993025	1	1	2	T4	T4	2	N0	0	3	3	1	0	1	0	0	1	0	1	4	1	8500/3: Infiltrating duct carcinoma, NOS	Dead (attributable to this cancer dx)	Alive or dead due to cancer
39994897	1	1	2	T3	T3	3	N0	1	1	1	2	0	0	0	0	1	0	1	47	0	8246/3: Neuroendocrine carcinoma, NOS	Alive or dead of other cause	Alive or dead due to cancer
39997219	2	1	2	T2	T2	2	N0	0	unknown	unknown	1	0	0	0	0	0	1	1	2	1	8140/3: Adenocarcinoma, NOS	Dead (missing/unknown COD)	Dead (missing/unknown COD)
40001236	1	1	1	T2	T2	2	N0	0	2	2	2	0	1	0	0	1	0	1	8	1	8140/3: Adenocarcinoma, NOS	Dead (attributable to this cancer dx)	Alive or dead due to cancer
40001839	1	1	2	T2	T2	2	N0	0	unknown	unknown	2	0	0	0	0	1	0	1	21	1	8500/3: Infiltrating duct carcinoma, NOS	Dead (attributable to this cancer dx)	Alive or dead due to cancer
40003796	2	1	2	T4	T4	2	N1	0	2	2	1	0	1	0	0	0	1	1	13	1	8500/3: Infiltrating duct carcinoma, NOS	Dead (attributable to this cancer dx)	Alive or dead due to cancer
40004021	1	1	1	T4	T4	3	N1	0	3	3	2	0	0	1	0	1	0	1	1	1	8140/3: Adenocarcinoma, NOS	Dead (attributable to this cancer dx)	Alive or dead due to cancer
40004404	2	1	1	T4	T4	2	N1	0	unknown	unknown	3	0	1	0	0	1	0	1	21	1	8140/3: Adenocarcinoma, NOS	Dead (attributable to this cancer dx)	Alive or dead due to cancer
40006881	2	1	1	T2	T3	3	N0	0	3	3	2	0	1	0	0	1	0	1	10	1	8140/3: Adenocarcinoma, NOS	Dead (attributable to this cancer dx)	Alive or dead due to cancer
40009521	2	1	1	T3	T3	3	N1	0	2	2	2	0	1	0	0	1	1	1	2	1	8140/3: Adenocarcinoma, NOS	Dead (attributable to this cancer dx)	Alive or dead due to cancer
40011345	2	1	1	T3	T3	3	N0	0	unknown	unknown	2	0	1	0	0	1	0	1	11	1	8010/3: Carcinoma, NOS	Alive or dead of other cause	Dead (attributable to causes other than this cancer dx)
40012027	1	1	2	T3	T3	3	N0	1	unknown	unknown	3	0	1	0	0	1	0	1	42	0	8452/3: Solid pseudopapillary carcinoma	Alive or dead of other cause	Alive or dead due to cancer
40018259	1	1	1	T3	T3	3	N1	0	unknown	unknown	2	0	1	0	0	1	0	1	8	1	8140/3: Adenocarcinoma, NOS	Dead (attributable to this cancer dx)	Alive or dead due to cancer
40018436	2	1	1	T4	T4	3	N0	0	unknown	unknown	2	0	0	0	0	1	0	1	2	1	8560/3: Adenosquamous carcinoma	Dead (attributable to this cancer dx)	Alive or dead due to cancer
40019355	1	1	2	T3	T3	3	N0	0	unknown	unknown	1	0	0	0	0	1	0	1	2	1	8010/3: Carcinoma, NOS	Dead (attributable to this cancer dx)	Alive or dead due to cancer
40019510	2	1	1	T3	T2	2	N0	0	unknown	unknown	3	0	0	0	0	0	0	1	5	1	8140/3: Adenocarcinoma, NOS	Dead (attributable to this cancer dx)	Alive or dead due to cancer
40023162	2	1	1	T2	T3	3	N0	0	unknown	unknown	2	0	1	0	0	1	0	1	1	1	8010/3: Carcinoma, NOS	Dead (attributable to this cancer dx)	Alive or dead due to cancer
40023589	1	1	2	T3	T2	2	N0	0	2	2	1	0	0	0	0	1	0	1	7	1	8140/3: Adenocarcinoma, NOS	Dead (attributable to this cancer dx)	Alive or dead due to cancer
40027171	1	1	2	T3	T2	2	N0	0	unknown	unknown	1	0	1	0	0	1	0	1	7	1	8140/3: Adenocarcinoma, NOS	Dead (attributable to this cancer dx)	Alive or dead due to cancer
40028310	2	1	1	T2	T2	2	N0	0	unknown	unknown	2	0	1	0	0	1	0	1	3	1	8140/3: Adenocarcinoma, NOS	Dead (attributable to this cancer dx)	Alive or dead due to cancer
40408206	1	1	2	T4	T4	3	N1	0	unknown	unknown	1	0	1	0	0	1	1	0	2	1	8140/3: Adenocarcinoma, NOS	N/A not first tumor	N/A not first tumor
40410089	1	1	2	T3	T3	3	N1	0	2	2	1	0	1	0	0	0	1	1	22	1	8140/3: Adenocarcinoma, NOS	Dead (attributable to this cancer dx)	Alive or dead due to cancer
40416840	1	1	2	T2	T2	2	N0	0	unknown	unknown	1	0	1	1	0	1	1	1	2	1	8140/3: Adenocarcinoma, NOS	Dead (attributable to this cancer dx)	Alive or dead due to cancer
40419482	2	1	2	T2	T3	3	N1	0	unknown	unknown	1	0	1	1	0	1	0	1	11	1	8480/3: Mucinous adenocarcinoma	Dead (attributable to this cancer dx)	Alive or dead due to cancer
40419794	1	1	1	T3	T2	2	N1	0	3	3	2	0	1	0	0	1	1	1	4	1	8140/3: Adenocarcinoma, NOS	Dead (attributable to this cancer dx)	Alive or dead due to cancer
40420286	1	1	1	T4	T4	3	N0	0	2	2	2	0	1	0	0	1	0	1	4	1	8140/3: Adenocarcinoma, NOS	Dead (attributable to this cancer dx)	Alive or dead due to cancer
40424330	2	1	1	T4	T4	3	N0	0	unknown	unknown	3	0	1	0	0	1	0	1	7	1	8140/3: Adenocarcinoma, NOS	Dead (attributable to this cancer dx)	Alive or dead due to cancer
40425892	2	1	1	T4	T4	3	N0	0	unknown	unknown	1	0	0	0	0	1	0	1	2	1	8140/3: Adenocarcinoma, NOS	Dead (attributable to this cancer dx)	Alive or dead due to cancer
40427185	1	1	1	T3	T2	2	N1	0	unknown	unknown	1	0	0	0	0	1	0	1	2	1	8500/3: Infiltrating duct carcinoma, NOS	Dead (attributable to this cancer dx)	Alive or dead due to cancer
40432051	2	1	2	T4	T4	2	N0	0	unknown	unknown	1	0	0	0	0	1	0	1	4	1	8140/3: Adenocarcinoma, NOS	Dead (attributable to this cancer dx)	Alive or dead due to cancer
40434258	2	1	1	T2	T2	2	N0	0	unknown	unknown	1	0	0	0	0	1	0	1	10	1	8140/3: Adenocarcinoma, NOS	Dead (attributable to this cancer dx)	Alive or dead due to cancer
40436882	1	1	2	T3	T3	3	N0	0	unknown	unknown	3	0	0	0	0	0	0	1	9	0	8246/3: Neuroendocrine carcinoma, NOS	Alive or dead of other cause	Alive or dead due to cancer
40438541	1	1	2	T4	T4	3	N1	0	2	2	3	0	1	0	0	0	0	1	11	1	8140/3: Adenocarcinoma, NOS	Dead (attributable to this cancer dx)	Alive or dead due to cancer
40438767	1	1	2	T3	T3	3	N0	0	3	3	3	0	0	0	0	1	0	1	1	1	8140/3: Adenocarcinoma, NOS	Dead (attributable to this cancer dx)	Alive or dead due to cancer
40442857	2	1	1	T3	T2	2	N1	1	2	2	1	0	1	0	0	0	1	1	33	0	8140/3: Adenocarcinoma, NOS	Alive or dead of other cause	Alive or dead due to cancer
40444703	2	1	2	T4	T4	3	N0	0	3	3	2	0	1	0	0	0	0	1	1	1	8140/3: Adenocarcinoma, NOS	Dead (attributable to this cancer dx)	Alive or dead due to cancer
40446648	2	1	2	T2	T2	2	N1	0	unknown	unknown	2	0	1	0	0	0	0	1	13	1	8140/3: Adenocarcinoma, NOS	Dead (attributable to this cancer dx)	Alive or dead due to cancer
40446862	2	1	1	T3	T2	2	N1	0	unknown	unknown	3	0	0	0	0	1	0	1	5	1	8140/3: Adenocarcinoma, NOS	Dead (attributable to this cancer dx)	Alive or dead due to cancer
40448814	1	1	1	T4	T4	3	N0	0	3	3	3	1	1	0	0	1	0	1	27	0	8240/3: Carcinoid tumor, NOS	Alive or dead of other cause	Alive or dead due to cancer
40453871	1	1	1	T4	T4	3	N0	0	unknown	unknown	2	0	1	0	0	1	0	1	11	1	8140/3: Adenocarcinoma, NOS	Dead (attributable to this cancer dx)	Alive or dead due to cancer
40454604	2	1	1	T4	T4	3	N1	0	3	3	2	0	1	0	0	1	1	1	11	1	8490/3: Signet ring cell carcinoma	Dead (attributable to this cancer dx)	Alive or dead due to cancer
40455242	2	1	2	T3	T3	3	N0	0	3	3	1	0	1	0	0	1	0	1	6	1	8010/3: Carcinoma, NOS	Dead (attributable to this cancer dx)	Alive or dead due to cancer
40458178	2	1	1	T2	T2	2	N0	0	2	2	1	0	0	0	0	1	0	1	2	1	8500/3: Infiltrating duct carcinoma, NOS	Dead (attributable to this cancer dx)	Alive or dead due to cancer
40458641	2	1	1	T3	T3	3	N1	0	unknown	unknown	1	0	0	0	0	0	0	1	4	1	8500/3: Infiltrating duct carcinoma, NOS	Dead (attributable to this cancer dx)	Alive or dead due to cancer
40459298	2	1	1	T4	T4	3	N1	0	unknown	unknown	2	0	1	0	0	1	0	1	3	1	8140/3: Adenocarcinoma, NOS	Dead (attributable to this cancer dx)	Alive or dead due to cancer
40460316	2	1	2	T2	T3	3	N0	0	unknown	unknown	2	0	1	0	1	0	0	1	3	1	8140/3: Adenocarcinoma, NOS	Dead (attributable to this cancer dx)	Alive or dead due to cancer
40461250	2	1	1	T3	T2	2	N0	0	unknown	unknown	1	0	0	0	0	1	0	1	2	1	8140/3: Adenocarcinoma, NOS	Dead (attributable to this cancer dx)	Alive or dead due to cancer
40463575	2	1	2	T2	T2	2	N1	0	unknown	unknown	2	1	1	1	0	1	1	1	1	1	8140/3: Adenocarcinoma, NOS	Dead (attributable to this cancer dx)	Alive or dead due to cancer
40464749	1	1	1	T3	T2	2	N1	1	1	1	1	0	0	0	0	1	0	1	31	0	8240/3: Carcinoid tumor, NOS	Alive or dead of other cause	Alive or dead due to cancer
40465846	1	1	1	T4	T4	2	N1	1	2	2	1	1	1	0	0	0	0	1	18	1	8140/3: Adenocarcinoma, NOS	Dead (attributable to this cancer dx)	Alive or dead due to cancer
40466782	1	1	2	T3	T3	3	N0	0	unknown	unknown	3	0	0	0	0	1	0	1	2	1	8140/3: Adenocarcinoma, NOS	Dead (attributable to this cancer dx)	Alive or dead due to cancer
40469124	2	1	1	T3	T2	2	N1	1	3	3	1	0	0	0	0	1	0	1	15	1	8246/3: Neuroendocrine carcinoma, NOS	Dead (attributable to this cancer dx)	Alive or dead due to cancer
40470758	2	1	2	T2	T2	2	N1	0	3	3	1	0	1	0	0	1	0	1	10	1	8140/3: Adenocarcinoma, NOS	Dead (attributable to this cancer dx)	Alive or dead due to cancer
40472555	1	1	1	T4	T4	3	N1	0	unknown	unknown	1	0	1	0	0	1	0	1	1	1	8140/3: Adenocarcinoma, NOS	Dead (attributable to this cancer dx)	Alive or dead due to cancer
40475852	2	1	1	T1	T1	1	N0	0	unknown	unknown	1	0	1	0	0	0	0	1	22	1	8480/3: Mucinous adenocarcinoma	Dead (attributable to this cancer dx)	Alive or dead due to cancer
40476708	2	1	2	T2	T2	2	N0	0	unknown	unknown	1	0	1	0	0	0	1	1	6	1	8260/3: Papillary adenocarcinoma, NOS	Dead (attributable to this cancer dx)	Alive or dead due to cancer
40478704	2	1	2	T4	T4	2	N1	0	unknown	unknown	1	0	1	0	0	1	1	1	7	0	8140/3: Adenocarcinoma, NOS	Alive or dead of other cause	Alive or dead due to cancer
40479970	1	1	2	T2	T3	3	N0	0	unknown	unknown	1	0	1	0	0	1	1	1	5	1	8140/3: Adenocarcinoma, NOS	Dead (attributable to this cancer dx)	Alive or dead due to cancer
40480256	1	1	2	T4	T4	3	N0	0	1	1	1	0	0	0	0	1	0	1	28	0	8240/3: Carcinoid tumor, NOS	Alive or dead of other cause	Alive or dead due to cancer
40480512	2	1	1	T3	T3	3	N1	0	unknown	unknown	2	0	0	0	0	1	0	1	1	1	8560/3: Adenosquamous carcinoma	Dead (attributable to this cancer dx)	Alive or dead due to cancer
40483000	1	1	1	T3	T2	2	N1	0	3	3	3	0	1	0	0	1	0	1	3	1	8490/3: Signet ring cell carcinoma	Dead (attributable to this cancer dx)	Alive or dead due to cancer
40483752	1	1	2	T3	T2	2	N1	0	unknown	unknown	1	0	1	0	0	0	1	1	21	1	8140/3: Adenocarcinoma, NOS	Dead (attributable to this cancer dx)	Alive or dead due to cancer
40484931	2	1	1	T2	T2	2	N0	0	unknown	unknown	2	0	0	0	0	1	0	1	1	1	8010/3: Carcinoma, NOS	Dead (attributable to this cancer dx)	Alive or dead due to cancer
40485184	1	1	2	T3	T3	3	N1	0	3	3	1	0	0	0	0	1	1	1	1	1	8140/3: Adenocarcinoma, NOS	Dead (attributable to this cancer dx)	Alive or dead due to cancer
40488599	1	1	2	T4	T4	2	N0	0	unknown	unknown	3	0	1	0	0	0	0	1	5	1	8140/3: Adenocarcinoma, NOS	Dead (attributable to this cancer dx)	Alive or dead due to cancer
40492522	2	1	1	T3	T2	2	N1	0	3	3	1	0	0	0	0	1	0	1	8	1	8140/3: Adenocarcinoma, NOS	Dead (attributable to this cancer dx)	Alive or dead due to cancer
40495914	2	1	1	T2	T3	3	N1	0	unknown	unknown	3	0	0	0	0	1	1	1	2	1	8140/3: Adenocarcinoma, NOS	Dead (missing/unknown COD)	Dead (missing/unknown COD)
40496168	1	1	1	T3	T3	3	N1	0	3	3	2	0	1	0	0	1	0	1	1	1	8140/3: Adenocarcinoma, NOS	Dead (attributable to this cancer dx)	Alive or dead due to cancer
40496683	1	1	2	T2	T2	2	N0	0	3	3	2	0	0	0	0	1	0	1	1	1	8140/3: Adenocarcinoma, NOS	Dead (attributable to this cancer dx)	Alive or dead due to cancer
40498958	1	3	2	T4	T4	3	N1	0	3	3	3	0	1	0	0	1	1	1	7	1	8013/3: Large cell neuroendocrine carcinoma	Dead (attributable to this cancer dx)	Alive or dead due to cancer
40504379	1	1	1	T3	T3	3	N0	1	2	2	3	1	0	0	0	1	0	1	24	0	8240/3: Carcinoid tumor, NOS	Alive or dead of other cause	Alive or dead due to cancer
40504513	2	1	2	T3	T3	3	N0	0	unknown	unknown	1	0	1	0	0	0	0	1	2	1	8500/3: Infiltrating duct carcinoma, NOS	Dead (attributable to this cancer dx)	Alive or dead due to cancer
40509955	2	1	2	T4	T4	3	N1	0	unknown	unknown	2	0	1	0	0	1	1	1	8	1	8140/3: Adenocarcinoma, NOS	Dead (attributable to this cancer dx)	Alive or dead due to cancer
40510080	1	1	2	T3	T3	3	N0	0	unknown	unknown	2	0	0	0	0	1	0	1	2	1	8140/3: Adenocarcinoma, NOS	Dead (attributable to this cancer dx)	Alive or dead due to cancer
40513007	1	1	2	T3	T3	3	N1	1	3	3	1	0	0	0	0	1	0	1	4	1	8140/3: Adenocarcinoma, NOS	Dead (attributable to this cancer dx)	Alive or dead due to cancer
40515087	2	1	2	T4	T4	3	N0	0	unknown	unknown	2	0	1	0	0	1	0	1	7	1	8140/3: Adenocarcinoma, NOS	Dead (attributable to this cancer dx)	Alive or dead due to cancer
40515399	2	1	1	T4	T4	3	N0	0	2	2	2	0	0	0	0	0	0	1	10	1	8140/3: Adenocarcinoma, NOS	Dead (attributable to this cancer dx)	Alive or dead due to cancer
40519226	1	1	1	T2	T2	2	N0	0	unknown	unknown	1	0	0	0	0	1	0	1	3	1	8140/3: Adenocarcinoma, NOS	Dead (attributable to this cancer dx)	Alive or dead due to cancer
40527688	2	1	1	T2	T3	3	N0	0	unknown	unknown	2	0	1	0	0	1	0	1	11	1	8140/3: Adenocarcinoma, NOS	Dead (attributable to this cancer dx)	Alive or dead due to cancer
40528862	2	1	2	T3	T2	2	N1	0	unknown	unknown	1	0	1	0	0	0	0	1	10	1	8140/3: Adenocarcinoma, NOS	Dead (attributable to this cancer dx)	Alive or dead due to cancer
40530944	2	1	1	T2	T3	3	N0	0	unknown	unknown	2	0	1	0	0	1	0	1	5	1	8140/3: Adenocarcinoma, NOS	Dead (attributable to this cancer dx)	Alive or dead due to cancer
40531709	1	1	1	T2	T2	2	N1	0	unknown	unknown	1	0	1	0	0	1	0	1	18	0	8140/3: Adenocarcinoma, NOS	Alive or dead of other cause	Alive or dead due to cancer
40533978	2	1	1	T2	T3	3	N1	0	2	2	1	0	1	0	0	1	0	1	17	1	8240/3: Carcinoid tumor, NOS	Dead (attributable to this cancer dx)	Alive or dead due to cancer
40538587	2	1	2	T2	T2	2	N0	0	2	2	3	0	0	0	0	1	0	1	1	1	8140/3: Adenocarcinoma, NOS	Dead (attributable to this cancer dx)	Alive or dead due to cancer
40540814	2	1	2	T3	T2	2	N0	0	3	3	2	1	1	1	0	1	0	1	4	1	8500/3: Infiltrating duct carcinoma, NOS	Dead (attributable to this cancer dx)	Alive or dead due to cancer
40540926	2	1	2	T4	T4	3	N0	0	unknown	unknown	2	0	0	0	0	1	1	1	1	1	8140/3: Adenocarcinoma, NOS	Dead (attributable to this cancer dx)	Alive or dead due to cancer
40544872	2	1	2	T2	T2	2	N0	0	unknown	unknown	2	0	0	0	0	1	0	1	1	1	8140/3: Adenocarcinoma, NOS	Dead (attributable to this cancer dx)	Alive or dead due to cancer
40546132	1	1	2	T3	T3	3	N0	0	unknown	unknown	1	0	1	0	0	1	0	1	7	1	8140/3: Adenocarcinoma, NOS	Dead (attributable to this cancer dx)	Alive or dead due to cancer
40546650	2	1	2	T2	T3	3	N1	0	3	3	2	0	0	0	0	0	0	1	1	1	8010/3: Carcinoma, NOS	Dead (attributable to this cancer dx)	Alive or dead due to cancer
40558417	2	1	2	T4	T4	3	N1	0	3	3	1	0	1	0	0	1	1	1	3	1	8246/3: Neuroendocrine carcinoma, NOS	Dead (attributable to this cancer dx)	Alive or dead due to cancer
40558797	2	1	2	T4	T4	3	N0	1	2	2	3	0	1	0	0	0	0	1	12	0	8560/3: Adenosquamous carcinoma	Alive or dead of other cause	Alive or dead due to cancer
40559017	1	1	1	T3	T3	3	N1	1	1	1	1	0	0	0	0	1	0	1	7	0	8240/3: Carcinoid tumor, NOS	Alive or dead of other cause	Alive or dead due to cancer
40559042	2	1	2	T3	T3	3	N1	0	unknown	unknown	1	0	1	0	0	1	1	1	3	1	8500/3: Infiltrating duct carcinoma, NOS	Dead (attributable to this cancer dx)	Alive or dead due to cancer
40562000	2	1	2	T4	T4	3	N0	0	unknown	unknown	2	0	1	0	0	0	1	1	13	0	8140/3: Adenocarcinoma, NOS	Alive or dead of other cause	Alive or dead due to cancer
40562854	2	1	1	T2	T3	3	N0	0	1	1	1	0	1	0	0	1	0	1	15	0	8480/3: Mucinous adenocarcinoma	Alive or dead of other cause	Alive or dead due to cancer
40565801	2	1	1	T3	T2	2	N1	1	2	2	1	0	0	0	0	0	0	1	2	1	8140/3: Adenocarcinoma, NOS	Dead (missing/unknown COD)	Dead (missing/unknown COD)
40565988	2	1	2	T2	T3	3	N0	0	1	1	3	0	0	0	0	1	0	1	3	1	8246/3: Neuroendocrine carcinoma, NOS	Dead (attributable to this cancer dx)	Alive or dead due to cancer
40566046	2	1	1	T4	T4	3	N1	0	unknown	unknown	2	0	0	0	0	1	1	1	2	1	8140/3: Adenocarcinoma, NOS	Dead (attributable to this cancer dx)	Alive or dead due to cancer
40566241	2	1	1	T4	T4	2	N0	0	unknown	unknown	2	0	1	0	0	1	0	1	15	0	8140/3: Adenocarcinoma, NOS	Alive or dead of other cause	Alive or dead due to cancer
40566451	2	1	2	T3	T2	2	N0	0	unknown	unknown	1	0	1	0	0	0	1	1	3	1	8480/3: Mucinous adenocarcinoma	Dead (attributable to this cancer dx)	Alive or dead due to cancer
40567757	1	1	1	T3	T1	1	N0	1	1	1	1	0	1	0	0	1	0	1	6	0	8500/3: Infiltrating duct carcinoma, NOS	Alive or dead of other cause	Alive or dead due to cancer
40568114	2	2	1	T3	T2	2	N0	0	unknown	unknown	3	0	0	0	0	1	0	1	1	1	8140/3: Adenocarcinoma, NOS	Dead (attributable to this cancer dx)	Alive or dead due to cancer
40570040	1	1	1	T4	T4	3	N1	0	unknown	unknown	3	0	1	0	0	1	0	1	6	1	8140/3: Adenocarcinoma, NOS	Dead (attributable to this cancer dx)	Alive or dead due to cancer
40570085	2	1	1	T2	T3	3	N0	0	2	2	1	0	0	0	0	1	0	1	2	1	8500/3: Infiltrating duct carcinoma, NOS	Dead (attributable to this cancer dx)	Alive or dead due to cancer
40570769	2	1	2	T4	T4	3	N0	0	unknown	unknown	2	0	0	0	0	0	0	1	3	1	8140/3: Adenocarcinoma, NOS	Dead (attributable to this cancer dx)	Alive or dead due to cancer
40573632	1	1	2	T1	T1	1	N1	0	unknown	unknown	2	0	1	0	0	1	0	1	6	1	8010/3: Carcinoma, NOS	Dead (attributable to this cancer dx)	Alive or dead due to cancer
40576441	1	1	2	T3	T3	3	N1	0	2	2	1	0	1	0	0	1	0	1	7	0	8246/3: Neuroendocrine carcinoma, NOS	Alive or dead of other cause	Alive or dead due to cancer
40578502	1	1	1	T2	T2	2	N1	0	unknown	unknown	1	0	0	0	0	0	0	1	4	1	8140/3: Adenocarcinoma, NOS	Dead (attributable to this cancer dx)	Alive or dead due to cancer
40954276	2	1	1	T2	T3	3	N1	0	unknown	unknown	3	0	0	0	0	1	0	1	2	1	8140/3: Adenocarcinoma, NOS	Dead (attributable to this cancer dx)	Alive or dead due to cancer
40954895	2	1	1	T2	T3	3	N0	0	unknown	unknown	3	0	1	0	0	1	0	1	12	1	8140/3: Adenocarcinoma, NOS	Dead (attributable to this cancer dx)	Alive or dead due to cancer
40956831	2	1	2	T4	T4	3	N1	0	unknown	unknown	1	0	0	0	0	1	0	1	4	1	8140/3: Adenocarcinoma, NOS	Dead (attributable to this cancer dx)	Alive or dead due to cancer
40957945	2	1	2	T3	T2	2	N0	0	unknown	unknown	2	0	1	0	0	1	0	1	5	1	8140/3: Adenocarcinoma, NOS	Dead (attributable to this cancer dx)	Alive or dead due to cancer
40964559	2	1	2	T4	T4	3	N0	0	unknown	unknown	1	0	0	0	0	1	0	1	1	1	8140/3: Adenocarcinoma, NOS	Dead (attributable to this cancer dx)	Alive or dead due to cancer
40980310	2	1	2	T2	T3	3	N0	0	unknown	unknown	1	0	1	0	0	1	0	1	18	0	8140/3: Adenocarcinoma, NOS	Alive or dead of other cause	Alive or dead due to cancer
40988966	1	1	1	T2	T3	3	N1	0	1	1	2	0	0	0	0	1	0	1	6	1	8240/3: Carcinoid tumor, NOS	Dead (attributable to this cancer dx)	Alive or dead due to cancer
40991535	2	1	1	T2	T3	3	N1	0	2	2	1	0	1	0	0	1	0	1	2	1	8140/3: Adenocarcinoma, NOS	Dead (attributable to this cancer dx)	Alive or dead due to cancer
41001959	1	1	1	T3	T3	3	N0	0	2	2	3	0	1	0	0	0	0	1	12	1	8140/3: Adenocarcinoma, NOS	Dead (attributable to this cancer dx)	Alive or dead due to cancer
42203211	2	1	1	T3	T2	2	N0	0	unknown	unknown	3	0	0	0	0	1	0	0	1	1	8500/3: Infiltrating duct carcinoma, NOS	N/A not first tumor	N/A not first tumor
42223229	2	1	2	T4	T4	2	N0	0	unknown	unknown	1	0	0	0	0	1	0	0	1	1	8480/3: Mucinous adenocarcinoma	N/A not first tumor	N/A not first tumor
42234916	2	1	1	T3	T3	3	N1	1	1	1	2	0	0	0	0	1	0	0	26	1	8240/3: Carcinoid tumor, NOS	N/A not first tumor	N/A not first tumor
43403129	2	3	1	T3	T1	1	N0	0	unknown	unknown	1	0	0	0	0	1	0	0	2	1	8140/3: Adenocarcinoma, NOS	N/A not first tumor	N/A not first tumor
43909660	2	1	1	T4	T4	3	N1	0	unknown	unknown	2	0	0	0	0	1	0	0	1	1	8140/3: Adenocarcinoma, NOS	N/A not first tumor	N/A not first tumor
43947296	1	1	2	T4	T4	3	N1	0	2	2	1	0	1	0	0	1	0	0	8	1	8140/3: Adenocarcinoma, NOS	N/A not first tumor	N/A not first tumor
44468292	1	1	2	T4	T4	3	N1	0	3	3	2	0	1	0	0	0	0	0	10	1	8500/3: Infiltrating duct carcinoma, NOS	N/A not first tumor	N/A not first tumor
44945142	2	1	2	T3	T3	3	N1	0	unknown	unknown	1	0	1	0	0	0	0	0	2	1	8000/3: Neoplasm, malignant	N/A not first tumor	N/A not first tumor
44955301	2	1	1	T2	T2	2	N0	0	2	2	1	0	0	0	0	0	0	0	3	1	8140/3: Adenocarcinoma, NOS	N/A not first tumor	N/A not first tumor
44964412	2	1	2	T2	T3	3	N0	1	2	2	3	0	1	0	0	1	0	0	30	1	8140/3: Adenocarcinoma, NOS	N/A not first tumor	N/A not first tumor
45557102	1	1	1	T3	T3	3	N0	0	3	3	2	1	1	0	0	1	0	1	6	1	8140/3: Adenocarcinoma, NOS	N/A not first tumor	N/A not first tumor
46044696	2	1	2	T4	T4	3	N0	0	unknown	unknown	3	1	0	0	0	0	1	0	3	1	8480/3: Mucinous adenocarcinoma	N/A not first tumor	N/A not first tumor
47134585	2	1	1	T2	T2	2	N1	0	unknown	unknown	1	0	0	0	0	1	0	0	1	1	8140/3: Adenocarcinoma, NOS	N/A not first tumor	N/A not first tumor
47653283	2	1	2	T2	T3	3	N0	0	unknown	unknown	2	0	0	0	0	1	0	0	3	1	8140/3: Adenocarcinoma, NOS	N/A not first tumor	N/A not first tumor
47758921	2	1	2	T3	T3	3	N0	0	2	2	1	0	1	0	0	0	0	0	20	1	8140/3: Adenocarcinoma, NOS	N/A not first tumor	N/A not first tumor
47776215	2	1	2	T3	T1	1	N1	0	unknown	unknown	1	0	1	0	0	1	0	0	6	1	8140/3: Adenocarcinoma, NOS	N/A not first tumor	N/A not first tumor
48762607	2	1	2	T3	T2	2	N0	0	unknown	unknown	2	0	0	0	0	1	0	0	5	1	8140/3: Adenocarcinoma, NOS	N/A not first tumor	N/A not first tumor
48797401	1	1	2	T4	T4	1	N0	1	3	3	1	0	1	0	0	1	0	0	5	1	8140/3: Adenocarcinoma, NOS	N/A not first tumor	N/A not first tumor
49418578	1	1	1	T4	T4	2	N1	0	unknown	unknown	2	0	1	0	0	1	0	0	11	1	8140/3: Adenocarcinoma, NOS	N/A not first tumor	N/A not first tumor
49427927	2	1	1	T2	T2	2	N0	0	unknown	unknown	3	0	0	1	0	1	1	0	1	1	8140/3: Adenocarcinoma, NOS	N/A not first tumor	N/A not first tumor
49889686	2	1	1	T2	T2	2	N0	0	3	3	2	0	0	0	0	1	0	0	4	1	8246/3: Neuroendocrine carcinoma, NOS	N/A not first tumor	N/A not first tumor
49946197	1	1	1	T2	T2	2	N0	0	3	3	2	0	0	0	0	1	0	0	4	1	8140/3: Adenocarcinoma, NOS	N/A not first tumor	N/A not first tumor
49979495	2	1	1	T4	T4	3	N0	0	unknown	unknown	3	0	1	0	0	1	0	0	22	1	8140/3: Adenocarcinoma, NOS	N/A not first tumor	N/A not first tumor
50429705	2	1	1	T2	T2	2	N0	0	3	3	1	0	1	0	0	1	0	0	9	1	8500/3: Infiltrating duct carcinoma, NOS	N/A not first tumor	N/A not first tumor
50438882	2	1	2	T3	T3	3	N1	0	2	2	3	0	0	0	0	1	0	0	8	1	8140/3: Adenocarcinoma, NOS	N/A not first tumor	N/A not first tumor
50522199	1	1	2	T1	T1	1	N0	0	unknown	unknown	1	1	1	0	1	0	1	0	2	1	8144/3: Adenocarcinoma, intestinal type	N/A not first tumor	N/A not first tumor
50977559	2	1	1	T2	T2	2	N0	0	3	3	3	0	0	0	0	1	0	1	3	1	8246/3: Neuroendocrine carcinoma, NOS	Dead (attributable to this cancer dx)	Alive or dead due to cancer
50997255	1	1	1	T3	T3	3	N1	0	2	2	1	0	1	0	0	1	0	0	6	1	8140/3: Adenocarcinoma, NOS	N/A not first tumor	N/A not first tumor
51589725	2	1	1	T3	T3	3	N0	0	unknown	unknown	2	0	1	0	0	1	0	0	11	1	8140/3: Adenocarcinoma, NOS	N/A not first tumor	N/A not first tumor
51632879	2	1	1	T2	T3	3	N0	0	3	3	1	0	1	0	0	1	0	0	2	1	8140/3: Adenocarcinoma, NOS	N/A not first tumor	N/A not first tumor
52148134	2	1	1	T3	T2	2	N0	0	unknown	unknown	1	0	1	0	0	1	0	0	23	1	8140/3: Adenocarcinoma, NOS	N/A not first tumor	N/A not first tumor
52163060	2	1	1	T4	T4	3	N0	0	unknown	unknown	2	0	0	0	0	1	0	1	2	1	8140/3: Adenocarcinoma, NOS	Dead (attributable to this cancer dx)	Alive or dead due to cancer
52165038	1	1	2	T3	T3	3	N1	1	1	1	1	0	0	0	0	1	0	1	83	0	8246/3: Neuroendocrine carcinoma, NOS	Alive or dead of other cause	Alive or dead due to cancer
52167468	2	1	2	T2	T2	2	N1	0	unknown	unknown	2	0	1	0	0	1	0	1	5	1	8140/3: Adenocarcinoma, NOS	Dead (attributable to this cancer dx)	Alive or dead due to cancer
52167547	2	1	2	T3	T3	3	N0	0	4	3	2	0	1	0	0	0	0	1	1	1	8021/3: Carcinoma, anaplastic, NOS	Dead (attributable to this cancer dx)	Alive or dead due to cancer
52168802	1	1	2	T2	T3	3	N0	0	unknown	unknown	3	0	1	0	0	1	0	1	3	1	8140/3: Adenocarcinoma, NOS	Dead (attributable to this cancer dx)	Alive or dead due to cancer
52169227	2	1	2	T4	T4	2	N1	0	2	2	1	0	1	0	0	1	0	1	10	1	8140/3: Adenocarcinoma, NOS	Dead (attributable to this cancer dx)	Alive or dead due to cancer
52169708	2	1	1	T2	T2	2	N0	0	2	2	1	0	1	0	0	1	0	1	5	1	8140/3: Adenocarcinoma, NOS	Dead (attributable to this cancer dx)	Alive or dead due to cancer
52169745	2	1	2	T2	T3	3	N1	1	1	1	3	0	1	0	0	1	0	1	39	1	8246/3: Neuroendocrine carcinoma, NOS	Alive or dead of other cause	Dead (attributable to causes other than this cancer dx)
52173157	1	1	2	T4	T4	2	N1	0	4	3	1	0	0	0	0	1	1	1	1	1	8010/3: Carcinoma, NOS	Dead (attributable to this cancer dx)	Alive or dead due to cancer
52182369	2	1	1	T3	T3	3	N0	0	4	3	3	0	1	0	0	1	0	1	1	1	8021/3: Carcinoma, anaplastic, NOS	Dead (attributable to this cancer dx)	Alive or dead due to cancer
52185673	1	1	1	T2	T3	3	N0	0	unknown	unknown	3	0	1	0	0	1	0	0	8	1	8246/3: Neuroendocrine carcinoma, NOS	N/A not first tumor	N/A not first tumor
52200508	1	1	1	T4	T4	3	N1	0	unknown	unknown	1	0	0	0	0	1	0	1	1	1	8140/3: Adenocarcinoma, NOS	Dead (attributable to this cancer dx)	Alive or dead due to cancer
52204859	2	1	2	T2	T2	2	N0	0	unknown	unknown	2	0	0	0	0	1	0	1	2	1	8140/3: Adenocarcinoma, NOS	Dead (attributable to this cancer dx)	Alive or dead due to cancer
52209236	2	1	1	T2	T3	3	N0	0	3	3	1	0	1	0	0	0	0	1	5	1	8010/3: Carcinoma, NOS	Dead (attributable to this cancer dx)	Alive or dead due to cancer
52210911	1	1	2	T3	T2	2	N0	0	3	3	1	0	1	0	0	1	0	1	8	1	8140/3: Adenocarcinoma, NOS	Dead (attributable to this cancer dx)	Alive or dead due to cancer
52605011	2	1	1	T4	T4	1	N1	0	unknown	unknown	1	0	1	1	0	1	1	1	3	1	8140/3: Adenocarcinoma, NOS	Dead (attributable to this cancer dx)	Alive or dead due to cancer
52607521	2	1	2	T2	T2	2	N0	0	unknown	unknown	1	0	1	0	0	1	0	1	4	1	8140/3: Adenocarcinoma, NOS	Dead (attributable to this cancer dx)	Alive or dead due to cancer
52608500	2	1	2	T2	T3	3	N1	0	unknown	unknown	1	0	1	0	0	1	0	1	1	1	8140/3: Adenocarcinoma, NOS	Dead (attributable to this cancer dx)	Alive or dead due to cancer
52609348	2	1	1	T3	T3	3	N0	0	unknown	unknown	1	0	0	0	0	1	0	1	2	1	8240/3: Carcinoid tumor, NOS	Dead (attributable to this cancer dx)	Alive or dead due to cancer
52609556	2	1	2	T4	T4	3	N0	0	unknown	unknown	1	0	0	0	0	1	0	1	6	1	8140/3: Adenocarcinoma, NOS	Dead (attributable to this cancer dx)	Alive or dead due to cancer
52615003	2	1	1	T4	T4	3	N0	0	unknown	unknown	3	0	0	0	0	1	0	1	3	1	8000/3: Neoplasm, malignant	Dead (attributable to this cancer dx)	Alive or dead due to cancer
52615144	2	1	1	T2	T2	2	N0	0	unknown	unknown	1	0	1	0	0	1	0	1	8	1	8480/3: Mucinous adenocarcinoma	Dead (attributable to this cancer dx)	Alive or dead due to cancer
52619001	2	1	2	T3	T3	3	N1	0	unknown	unknown	2	0	1	1	0	1	0	1	5	1	8140/3: Adenocarcinoma, NOS	Dead (attributable to this cancer dx)	Alive or dead due to cancer
52619480	1	1	2	T2	T3	3	N1	0	unknown	unknown	3	0	0	0	0	1	0	0	21	0	8140/3: Adenocarcinoma, NOS	N/A not first tumor	N/A not first tumor
52619956	2	1	2	T2	T3	3	N0	0	unknown	unknown	2	0	1	0	0	1	0	1	9	1	8140/3: Adenocarcinoma, NOS	Dead (attributable to this cancer dx)	Alive or dead due to cancer
52621030	1	1	2	T3	T2	2	N1	0	unknown	unknown	1	0	0	0	0	1	1	1	2	1	8140/3: Adenocarcinoma, NOS	Dead (attributable to this cancer dx)	Alive or dead due to cancer
52621145	2	1	1	T3	T3	3	N1	0	4	3	3	0	1	0	0	0	0	1	9	1	8020/3: Carcinoma, undifferentiated, NOS	Dead (attributable to this cancer dx)	Alive or dead due to cancer
52625611	2	1	2	T4	T4	3	N1	0	unknown	unknown	2	0	1	0	0	1	1	1	2	1	8140/3: Adenocarcinoma, NOS	Dead (attributable to this cancer dx)	Alive or dead due to cancer
52626840	1	1	2	T2	T2	2	N1	0	unknown	unknown	1	0	0	0	0	1	0	1	8	1	8140/3: Adenocarcinoma, NOS	Dead (attributable to this cancer dx)	Alive or dead due to cancer
52627632	2	1	1	T3	T3	3	N1	0	unknown	unknown	3	0	1	0	0	1	0	1	4	1	8140/3: Adenocarcinoma, NOS	Dead (attributable to this cancer dx)	Alive or dead due to cancer
52628236	2	1	2	T3	T3	3	N1	1	3	3	3	1	1	0	0	1	1	1	8	1	8140/3: Adenocarcinoma, NOS	Dead (attributable to this cancer dx)	Alive or dead due to cancer
52630667	2	1	2	T4	T4	2	N0	0	unknown	unknown	1	0	0	0	0	1	0	0	6	1	8140/3: Adenocarcinoma, NOS	N/A not first tumor	N/A not first tumor
52631202	2	1	2	T4	T4	2	N0	1	unknown	unknown	2	0	0	0	0	0	0	0	2	1	8140/3: Adenocarcinoma, NOS	N/A not first tumor	N/A not first tumor
52633497	1	1	2	T3	T2	2	N0	0	unknown	unknown	1	0	1	0	0	1	0	1	3	1	8140/3: Adenocarcinoma, NOS	Dead (attributable to this cancer dx)	Alive or dead due to cancer
52637551	1	1	2	T3	T3	3	N0	0	3	3	2	0	0	0	0	1	0	1	1	1	8481/3: Mucin-producing adenocarcinoma	Dead (attributable to this cancer dx)	Alive or dead due to cancer
52639263	1	1	2	T4	T4	2	N0	0	unknown	unknown	2	0	1	0	0	0	0	1	3	0	8140/3: Adenocarcinoma, NOS	Alive or dead of other cause	Alive or dead due to cancer
52641153	2	1	1	T4	T4	2	N1	0	2	2	1	0	0	0	0	1	0	1	1	1	8481/3: Mucin-producing adenocarcinoma	Dead (attributable to this cancer dx)	Alive or dead due to cancer
52647404	2	1	1	T3	T2	2	N0	0	3	3	2	0	1	0	0	0	0	1	15	1	8480/3: Mucinous adenocarcinoma	Dead (attributable to this cancer dx)	Alive or dead due to cancer
52653502	1	1	1	T2	T2	2	N0	0	unknown	unknown	1	0	0	0	0	1	0	1	1	1	8140/3: Adenocarcinoma, NOS	Dead (attributable to this cancer dx)	Alive or dead due to cancer
52656667	2	1	1	T2	T2	2	N0	0	3	3	2	0	1	0	0	1	0	1	1	1	8140/3: Adenocarcinoma, NOS	Dead (attributable to this cancer dx)	Alive or dead due to cancer
52658119	1	1	1	T2	T2	2	N0	0	unknown	unknown	1	0	0	0	0	1	0	1	2	0	8140/3: Adenocarcinoma, NOS	Alive or dead of other cause	Alive or dead due to cancer
52658560	2	1	1	T2	T3	3	N0	0	unknown	unknown	2	1	1	0	0	1	0	1	4	1	8140/3: Adenocarcinoma, NOS	Dead (attributable to this cancer dx)	Alive or dead due to cancer
52661622	2	1	1	T2	T2	2	N0	0	unknown	unknown	2	0	0	0	0	1	0	1	5	1	8140/3: Adenocarcinoma, NOS	Dead (attributable to this cancer dx)	Alive or dead due to cancer
52661857	2	1	2	T4	T4	2	N1	0	unknown	unknown	1	0	1	0	0	0	0	1	4	1	8140/3: Adenocarcinoma, NOS	Dead (attributable to this cancer dx)	Alive or dead due to cancer
52662044	2	1	1	T4	T4	3	N1	0	unknown	unknown	2	0	0	0	0	0	0	1	3	1	8140/3: Adenocarcinoma, NOS	Dead (attributable to this cancer dx)	Alive or dead due to cancer
52662050	1	1	2	T3	T3	3	N0	0	2	2	3	0	1	0	0	1	0	1	9	1	8140/3: Adenocarcinoma, NOS	Dead (attributable to this cancer dx)	Alive or dead due to cancer
52667288	2	1	2	T3	T2	2	N0	0	unknown	unknown	1	0	0	0	0	1	0	1	2	1	8140/3: Adenocarcinoma, NOS	Dead (attributable to this cancer dx)	Alive or dead due to cancer
52668341	2	1	2	T2	T2	2	N0	0	unknown	unknown	3	0	1	1	0	1	0	1	3	1	8140/3: Adenocarcinoma, NOS	Dead (attributable to this cancer dx)	Alive or dead due to cancer
52668485	2	1	2	T2	T2	2	N0	0	3	3	3	0	1	0	0	0	0	1	11	1	8140/3: Adenocarcinoma, NOS	Alive or dead of other cause	Dead (attributable to causes other than this cancer dx)
52669125	1	1	1	T3	T3	3	N0	0	unknown	unknown	3	0	0	0	0	1	0	1	1	1	8140/3: Adenocarcinoma, NOS	Dead (attributable to this cancer dx)	Alive or dead due to cancer
52670287	2	1	1	T1	T1	1	N0	0	unknown	unknown	2	0	0	0	0	0	0	0	2	1	8140/3: Adenocarcinoma, NOS	N/A not first tumor	N/A not first tumor
52671299	2	1	1	T4	T4	3	N1	0	2	2	2	0	0	0	0	1	0	1	2	1	8140/3: Adenocarcinoma, NOS	Dead (missing/unknown COD)	Dead (missing/unknown COD)
52671842	1	1	2	T1	T1	1	N0	0	unknown	unknown	1	0	1	0	0	1	0	1	59	1	8246/3: Neuroendocrine carcinoma, NOS	Dead (attributable to this cancer dx)	Alive or dead due to cancer
52678500	2	1	2	T2	T2	2	N0	0	unknown	unknown	1	0	0	0	0	1	0	1	1	1	8140/3: Adenocarcinoma, NOS	Dead (attributable to this cancer dx)	Alive or dead due to cancer
52681778	1	1	1	T2	T2	2	N0	0	unknown	unknown	2	0	0	0	0	1	0	1	2	1	8140/3: Adenocarcinoma, NOS	Dead (attributable to this cancer dx)	Alive or dead due to cancer
52685535	2	1	1	T2	T2	2	N1	0	unknown	unknown	3	0	1	0	0	1	0	0	3	1	8140/3: Adenocarcinoma, NOS	N/A not first tumor	N/A not first tumor
52687567	1	1	1	T2	T2	2	N0	0	unknown	unknown	1	0	0	0	0	1	0	1	5	1	8140/3: Adenocarcinoma, NOS	Dead (attributable to this cancer dx)	Alive or dead due to cancer
52687575	2	3	1	T3	T3	3	N0	0	unknown	unknown	2	0	1	0	0	1	0	1	3	1	8140/3: Adenocarcinoma, NOS	Dead (attributable to this cancer dx)	Alive or dead due to cancer
52691276	1	1	2	T3	T2	2	N0	0	unknown	unknown	2	0	1	0	0	1	0	1	10	1	8140/3: Adenocarcinoma, NOS	Dead (attributable to this cancer dx)	Alive or dead due to cancer
52695553	2	1	2	T2	T2	2	N0	0	unknown	unknown	3	0	1	0	0	1	0	1	1	1	8140/3: Adenocarcinoma, NOS	Dead (attributable to this cancer dx)	Alive or dead due to cancer
52696747	1	1	2	T2	T3	3	N1	0	unknown	unknown	3	0	1	0	0	1	1	1	5	1	8140/3: Adenocarcinoma, NOS	Dead (attributable to this cancer dx)	Alive or dead due to cancer
52696757	2	1	1	T3	T2	2	N1	1	2	2	1	0	0	0	0	0	0	1	13	1	8500/3: Infiltrating duct carcinoma, NOS	Dead (attributable to this cancer dx)	Alive or dead due to cancer
52696961	2	1	2	T3	T2	2	N0	0	unknown	unknown	2	0	1	0	0	1	0	1	2	1	8140/3: Adenocarcinoma, NOS	Alive or dead of other cause	Dead (attributable to causes other than this cancer dx)
52699473	1	1	2	T3	T3	3	N1	1	3	3	3	0	1	0	0	1	0	1	25	1	8140/3: Adenocarcinoma, NOS	Dead (attributable to this cancer dx)	Alive or dead due to cancer
52700967	2	1	2	T2	T2	2	N0	0	2	2	3	0	0	0	0	0	0	1	1	1	8140/3: Adenocarcinoma, NOS	Dead (attributable to this cancer dx)	Alive or dead due to cancer
52701554	2	1	1	T3	T3	3	N0	0	unknown	unknown	1	0	0	0	0	1	0	1	1	1	8046/3: Non-small cell carcinoma	Dead (attributable to this cancer dx)	Alive or dead due to cancer
52706736	1	1	1	T4	T4	3	N1	0	unknown	unknown	3	0	0	1	0	1	1	1	2	1	8140/3: Adenocarcinoma, NOS	Dead (attributable to this cancer dx)	Alive or dead due to cancer
52709438	2	1	2	T4	T4	3	N0	0	2	2	3	0	0	0	0	1	0	1	12	1	8140/3: Adenocarcinoma, NOS	Dead (missing/unknown COD)	Dead (missing/unknown COD)
52715450	1	1	2	T3	T3	3	N1	1	1	1	1	0	0	0	0	1	0	1	75	0	8010/3: Carcinoma, NOS	Alive or dead of other cause	Alive or dead due to cancer
52720403	2	1	1	T2	T3	3	N0	0	unknown	unknown	2	0	1	0	0	1	0	1	10	1	8140/3: Adenocarcinoma, NOS	Dead (attributable to this cancer dx)	Alive or dead due to cancer
52721176	2	1	1	T1	T1	1	N1	1	unknown	unknown	1	0	0	0	0	1	0	1	2	1	8140/3: Adenocarcinoma, NOS	Dead (attributable to this cancer dx)	Alive or dead due to cancer
52724114	1	1	2	T3	T2	2	N1	1	2	2	1	0	1	0	0	0	1	1	21	1	8140/3: Adenocarcinoma, NOS	Dead (attributable to this cancer dx)	Alive or dead due to cancer
52725241	2	1	2	T3	T3	3	N1	0	unknown	unknown	1	0	0	0	0	1	0	1	4	1	8481/3: Mucin-producing adenocarcinoma	Dead (attributable to this cancer dx)	Alive or dead due to cancer
52730993	1	1	1	T2	T3	3	N1	0	3	3	1	0	0	0	0	1	0	1	2	1	8140/3: Adenocarcinoma, NOS	Dead (attributable to this cancer dx)	Alive or dead due to cancer
52732408	2	1	1	T3	T3	3	N0	0	unknown	unknown	2	0	0	0	0	1	0	1	1	1	8140/3: Adenocarcinoma, NOS	Dead (attributable to this cancer dx)	Alive or dead due to cancer
52735762	1	1	1	T4	T4	2	N0	0	unknown	unknown	1	0	1	0	0	0	0	1	2	1	8140/3: Adenocarcinoma, NOS	Dead (attributable to this cancer dx)	Alive or dead due to cancer
52740898	2	1	1	T3	T3	3	N1	0	3	3	3	0	1	1	0	1	0	0	5	1	8140/3: Adenocarcinoma, NOS	N/A not first tumor	N/A not first tumor
52741007	2	1	2	T2	T2	2	N0	0	unknown	unknown	1	0	0	0	0	1	0	1	4	1	8140/3: Adenocarcinoma, NOS	Dead (attributable to this cancer dx)	Alive or dead due to cancer
52741606	2	1	2	T3	T2	2	N0	0	unknown	unknown	2	1	1	0	0	0	0	1	6	1	8140/3: Adenocarcinoma, NOS	Dead (attributable to this cancer dx)	Alive or dead due to cancer
52742128	2	1	1	T4	T4	2	N0	0	unknown	unknown	3	0	1	0	0	1	1	1	10	1	8140/3: Adenocarcinoma, NOS	Dead (attributable to this cancer dx)	Alive or dead due to cancer
52743774	1	1	1	T2	T2	2	N0	0	unknown	unknown	2	0	0	0	0	1	0	1	3	1	8010/3: Carcinoma, NOS	Dead (attributable to this cancer dx)	Alive or dead due to cancer
52752133	2	1	1	T2	T3	3	N0	0	3	3	2	0	0	0	0	1	0	1	1	1	8140/3: Adenocarcinoma, NOS	Dead (attributable to this cancer dx)	Alive or dead due to cancer
52752696	2	1	2	T1	T1	1	N0	0	1	1	3	0	0	0	0	1	0	1	3	1	8140/3: Adenocarcinoma, NOS	Dead (attributable to this cancer dx)	Alive or dead due to cancer
52753474	1	1	1	T3	T2	2	N0	0	unknown	unknown	1	1	1	0	0	1	0	1	18	1	8140/3: Adenocarcinoma, NOS	Dead (attributable to this cancer dx)	Alive or dead due to cancer
52753499	2	1	2	T4	T4	2	N0	0	unknown	unknown	3	0	1	0	0	0	0	1	13	1	8140/3: Adenocarcinoma, NOS	Dead (attributable to this cancer dx)	Alive or dead due to cancer
52755123	1	1	1	T2	T2	2	N0	0	unknown	unknown	1	0	0	0	0	1	0	1	4	1	8140/3: Adenocarcinoma, NOS	Dead (attributable to this cancer dx)	Alive or dead due to cancer
52758521	2	1	2	T2	T2	2	N0	0	unknown	unknown	2	0	1	0	0	0	0	1	9	1	8140/3: Adenocarcinoma, NOS	Dead (attributable to this cancer dx)	Alive or dead due to cancer
52759921	2	1	2	T2	T3	3	N0	0	unknown	unknown	3	0	1	0	0	1	0	1	10	1	8140/3: Adenocarcinoma, NOS	Dead (attributable to this cancer dx)	Alive or dead due to cancer
52762346	2	1	1	T3	T2	2	N1	0	unknown	unknown	1	0	1	0	0	1	0	1	2	1	8140/3: Adenocarcinoma, NOS	Alive or dead of other cause	Dead (attributable to causes other than this cancer dx)
52764581	2	1	1	T3	T2	2	N0	0	3	3	2	0	1	0	0	1	0	1	6	1	8140/3: Adenocarcinoma, NOS	Dead (attributable to this cancer dx)	Alive or dead due to cancer
53153168	2	1	1	T2	T2	2	N0	0	unknown	unknown	1	0	1	0	0	1	0	1	5	1	8140/3: Adenocarcinoma, NOS	Dead (attributable to this cancer dx)	Alive or dead due to cancer
53158475	1	1	2	T2	T2	2	N0	0	unknown	unknown	2	0	0	0	0	1	0	1	68	0	8150/3: Pancreatic endocrine tumor, malignant	Alive or dead of other cause	Alive or dead due to cancer
53164556	2	1	1	T2	T3	3	N0	0	unknown	unknown	1	0	0	0	0	1	0	1	2	1	8246/3: Neuroendocrine carcinoma, NOS	Dead (attributable to this cancer dx)	Alive or dead due to cancer
53166556	2	1	2	T2	T2	2	N1	0	1	1	1	1	1	0	0	1	1	0	7	1	8140/3: Adenocarcinoma, NOS	N/A not first tumor	N/A not first tumor
53166571	1	1	1	T3	T2	2	N1	1	3	3	2	0	1	0	0	1	0	1	14	1	8140/3: Adenocarcinoma, NOS	Dead (attributable to this cancer dx)	Alive or dead due to cancer
53167104	2	1	1	T2	T2	2	N0	0	unknown	unknown	3	1	1	0	0	0	1	1	4	1	8246/3: Neuroendocrine carcinoma, NOS	Dead (attributable to this cancer dx)	Alive or dead due to cancer
53167974	2	1	2	T3	T2	2	N1	1	3	3	1	0	1	0	0	0	0	1	13	1	8140/3: Adenocarcinoma, NOS	Dead (attributable to this cancer dx)	Alive or dead due to cancer
53168185	2	1	1	T3	T3	3	N1	0	unknown	unknown	2	0	1	0	0	1	0	1	36	0	8140/3: Adenocarcinoma, NOS	Alive or dead of other cause	Alive or dead due to cancer
53172975	1	1	1	T4	T4	3	N1	0	unknown	unknown	1	0	0	0	0	1	0	1	3	1	8140/3: Adenocarcinoma, NOS	Dead (attributable to this cancer dx)	Alive or dead due to cancer
53174268	1	1	2	T2	T2	2	N0	0	unknown	unknown	1	0	0	0	0	1	0	1	4	1	8140/3: Adenocarcinoma, NOS	Dead (attributable to this cancer dx)	Alive or dead due to cancer
53174860	1	1	1	T2	T3	3	N0	0	unknown	unknown	1	0	1	0	0	1	0	1	20	1	8140/3: Adenocarcinoma, NOS	Dead (missing/unknown COD)	Dead (missing/unknown COD)
53182500	2	1	1	T3	T3	3	N0	0	unknown	unknown	2	0	0	1	0	1	1	0	1	1	8140/3: Adenocarcinoma, NOS	N/A not first tumor	N/A not first tumor
53186217	1	1	1	T3	T2	2	N0	0	unknown	unknown	2	0	1	0	0	0	0	1	16	1	8140/3: Adenocarcinoma, NOS	Dead (attributable to this cancer dx)	Alive or dead due to cancer
53186372	2	1	2	T2	T2	2	N0	0	unknown	unknown	3	0	0	0	0	0	0	1	1	1	8140/3: Adenocarcinoma, NOS	Dead (attributable to this cancer dx)	Alive or dead due to cancer
53189699	1	1	2	T3	T2	2	N1	0	3	3	1	0	1	1	0	1	1	1	8	1	8140/3: Adenocarcinoma, NOS	Dead (attributable to this cancer dx)	Alive or dead due to cancer
53195084	1	1	1	T3	T2	2	N1	1	3	3	1	0	1	0	0	1	0	1	5	1	8560/3: Adenosquamous carcinoma	Dead (attributable to this cancer dx)	Alive or dead due to cancer
53195760	2	1	1	T4	T4	3	N1	0	unknown	unknown	2	0	1	0	0	1	0	1	1	1	8010/3: Carcinoma, NOS	Dead (attributable to this cancer dx)	Alive or dead due to cancer
53196527	2	1	2	T3	T3	3	N1	0	3	3	2	0	1	0	0	1	0	1	8	1	8140/3: Adenocarcinoma, NOS	Dead (attributable to this cancer dx)	Alive or dead due to cancer
53198487	2	1	1	T4	T4	3	N1	0	unknown	unknown	2	0	1	0	0	1	0	1	2	1	8140/3: Adenocarcinoma, NOS	Dead (attributable to this cancer dx)	Alive or dead due to cancer
53199430	2	1	2	T3	T2	2	N0	1	unknown	unknown	1	0	1	0	0	1	0	1	12	1	8140/3: Adenocarcinoma, NOS	Dead (attributable to this cancer dx)	Alive or dead due to cancer
53201745	1	1	2	T3	T2	2	N1	0	unknown	unknown	3	0	1	0	0	1	0	1	4	1	8246/3: Neuroendocrine carcinoma, NOS	Dead (missing/unknown COD)	Dead (missing/unknown COD)
53205026	2	1	2	T3	T2	2	N0	0	unknown	unknown	1	0	0	0	0	1	0	1	1	1	8140/3: Adenocarcinoma, NOS	Dead (attributable to this cancer dx)	Alive or dead due to cancer
53206889	2	1	1	T2	T2	2	N1	0	unknown	unknown	2	0	1	0	0	0	1	1	29	1	8140/3: Adenocarcinoma, NOS	Dead (attributable to this cancer dx)	Alive or dead due to cancer
53207671	2	1	1	T4	T4	3	N1	0	unknown	unknown	3	0	0	0	0	1	0	1	1	1	8140/3: Adenocarcinoma, NOS	Dead (attributable to this cancer dx)	Alive or dead due to cancer
53217827	2	1	2	T2	T3	3	N0	0	3	3	3	0	1	0	0	1	0	1	4	1	8140/3: Adenocarcinoma, NOS	Dead (attributable to this cancer dx)	Alive or dead due to cancer
53226790	1	1	2	T3	T2	2	N0	0	unknown	unknown	1	0	1	0	0	0	0	1	13	1	8140/3: Adenocarcinoma, NOS	Dead (attributable to this cancer dx)	Alive or dead due to cancer
53226805	2	1	1	T3	T2	2	N1	0	unknown	unknown	1	1	1	0	0	1	0	1	5	1	8140/3: Adenocarcinoma, NOS	Dead (attributable to this cancer dx)	Alive or dead due to cancer
53228373	2	1	1	T3	T2	2	N1	0	1	1	1	0	0	0	0	1	0	1	3	1	8140/3: Adenocarcinoma, NOS	Dead (attributable to this cancer dx)	Alive or dead due to cancer
53229217	2	1	1	T3	T3	3	N1	1	3	3	1	0	0	0	0	1	0	1	1	1	8140/3: Adenocarcinoma, NOS	Dead (attributable to this cancer dx)	Alive or dead due to cancer
53235887	2	1	1	T3	T3	3	N1	0	unknown	unknown	1	0	1	0	0	1	0	1	5	1	8140/3: Adenocarcinoma, NOS	Dead (attributable to this cancer dx)	Alive or dead due to cancer
53236776	2	1	1	T3	T2	2	N0	0	unknown	unknown	1	0	0	0	0	0	0	1	3	1	8140/3: Adenocarcinoma, NOS	Dead (attributable to this cancer dx)	Alive or dead due to cancer
53241911	1	1	1	T3	T3	3	N0	0	unknown	unknown	1	0	1	0	0	1	0	1	7	1	8140/3: Adenocarcinoma, NOS	Dead (attributable to this cancer dx)	Alive or dead due to cancer
53242999	2	1	1	T2	T3	3	N0	0	unknown	unknown	2	0	0	0	0	1	1	1	1	1	8140/3: Adenocarcinoma, NOS	Dead (attributable to this cancer dx)	Alive or dead due to cancer
53245226	2	1	2	T2	T2	2	N0	0	unknown	unknown	1	0	0	0	0	1	0	1	4	1	8140/3: Adenocarcinoma, NOS	Dead (attributable to this cancer dx)	Alive or dead due to cancer
53246613	2	1	1	T2	T2	2	N0	0	unknown	unknown	2	0	1	0	0	0	0	1	10	0	8140/3: Adenocarcinoma, NOS	Alive or dead of other cause	Alive or dead due to cancer
53250547	1	1	1	T4	T4	3	N1	0	2	2	2	0	1	1	0	0	1	1	12	1	8140/3: Adenocarcinoma, NOS	Dead (attributable to this cancer dx)	Alive or dead due to cancer
53254020	2	1	1	T2	T2	2	N1	0	2	2	1	0	1	0	0	1	0	1	2	1	8140/3: Adenocarcinoma, NOS	Dead (attributable to this cancer dx)	Alive or dead due to cancer
53258852	2	1	2	T2	T3	3	N0	0	4	3	3	0	1	0	0	1	0	1	2	1	8140/3: Adenocarcinoma, NOS	Dead (attributable to this cancer dx)	Alive or dead due to cancer
53259045	1	1	1	T1	T1	1	N1	0	unknown	unknown	1	0	1	0	0	1	0	1	18	1	8140/3: Adenocarcinoma, NOS	Dead (attributable to this cancer dx)	Alive or dead due to cancer
53260775	1	1	1	T2	T3	3	N0	0	unknown	unknown	3	0	0	0	0	1	0	1	2	1	8140/3: Adenocarcinoma, NOS	Dead (attributable to this cancer dx)	Alive or dead due to cancer
53261596	2	1	1	T2	T2	2	N0	0	unknown	unknown	1	0	1	0	0	1	0	1	12	1	8140/3: Adenocarcinoma, NOS	Dead (attributable to this cancer dx)	Alive or dead due to cancer
53267970	1	1	2	T4	T4	3	N1	0	3	3	1	0	1	0	0	1	0	0	4	1	8140/3: Adenocarcinoma, NOS	N/A not first tumor	N/A not first tumor
53271136	1	1	2	T2	T2	2	N0	1	unknown	unknown	3	0	1	0	0	0	0	1	62	0	8246/3: Neuroendocrine carcinoma, NOS	Alive or dead of other cause	Alive or dead due to cancer
53272620	1	2	1	T2	T3	3	N1	0	unknown	unknown	3	0	0	0	0	1	1	1	2	1	8140/3: Adenocarcinoma, NOS	Dead (attributable to this cancer dx)	Alive or dead due to cancer
53275027	2	1	2	T3	T2	2	N0	0	unknown	unknown	2	0	1	0	0	1	0	1	2	1	8140/3: Adenocarcinoma, NOS	Dead (attributable to this cancer dx)	Alive or dead due to cancer
53276573	2	1	1	T4	T4	2	N0	0	unknown	unknown	2	0	0	0	0	0	1	1	2	1	8480/3: Mucinous adenocarcinoma	Dead (attributable to this cancer dx)	Alive or dead due to cancer
53279252	2	1	1	T4	T4	3	N0	0	2	2	2	0	0	0	0	1	0	1	1	1	8500/3: Infiltrating duct carcinoma, NOS	Dead (attributable to this cancer dx)	Alive or dead due to cancer
53280663	2	1	2	T2	T2	2	N1	0	unknown	unknown	2	0	0	0	0	1	0	1	3	1	8140/3: Adenocarcinoma, NOS	Dead (attributable to this cancer dx)	Alive or dead due to cancer
53280743	2	1	2	T2	T2	2	N1	0	unknown	unknown	1	0	0	0	0	1	1	1	12	1	8140/3: Adenocarcinoma, NOS	Dead (attributable to this cancer dx)	Alive or dead due to cancer
53281197	2	1	2	T2	T3	3	N0	0	unknown	unknown	2	0	0	0	0	1	0	1	2	1	8246/3: Neuroendocrine carcinoma, NOS	Dead (attributable to this cancer dx)	Alive or dead due to cancer
53281911	2	1	2	T3	T3	3	N0	0	unknown	unknown	1	0	0	0	0	1	0	1	1	1	8140/3: Adenocarcinoma, NOS	Dead (attributable to this cancer dx)	Alive or dead due to cancer
53282204	2	1	2	T3	T3	3	N1	0	unknown	unknown	3	0	1	0	0	1	0	1	1	1	8140/3: Adenocarcinoma, NOS	Dead (attributable to this cancer dx)	Alive or dead due to cancer
53286800	2	1	1	T2	T3	3	N1	0	unknown	unknown	2	0	1	0	0	1	0	1	3	1	8140/3: Adenocarcinoma, NOS	Alive or dead of other cause	Dead (attributable to causes other than this cancer dx)
53288165	2	1	1	T4	T4	3	N0	0	unknown	unknown	1	0	1	0	0	0	0	1	17	1	8140/3: Adenocarcinoma, NOS	Dead (attributable to this cancer dx)	Alive or dead due to cancer
53289172	1	1	1	T2	T3	3	N1	0	3	3	3	0	0	0	0	1	0	1	14	1	8140/3: Adenocarcinoma, NOS	Alive or dead of other cause	Dead (attributable to causes other than this cancer dx)
53291917	1	1	1	T2	T3	3	N0	0	unknown	unknown	2	0	1	0	0	0	0	1	40	1	8490/3: Signet ring cell carcinoma	Dead (attributable to this cancer dx)	Alive or dead due to cancer
53297494	2	1	2	T2	T2	2	N0	0	unknown	unknown	1	0	1	0	0	1	0	1	34	1	8140/3: Adenocarcinoma, NOS	Dead (missing/unknown COD)	Dead (missing/unknown COD)
53304141	2	1	1	T2	T2	2	N0	0	unknown	unknown	2	0	0	0	0	1	0	1	1	1	8140/3: Adenocarcinoma, NOS	Dead (attributable to this cancer dx)	Alive or dead due to cancer
53308087	2	1	1	T2	T3	3	N0	0	unknown	unknown	3	0	0	0	0	1	1	1	6	1	8140/3: Adenocarcinoma, NOS	Dead (attributable to this cancer dx)	Alive or dead due to cancer
53309039	2	1	1	T4	T4	3	N1	1	3	3	2	0	1	0	0	1	0	1	58	0	8246/3: Neuroendocrine carcinoma, NOS	Alive or dead of other cause	Alive or dead due to cancer
53309494	1	1	2	T4	T4	3	N0	0	unknown	unknown	3	0	1	0	0	1	0	1	12	1	8246/3: Neuroendocrine carcinoma, NOS	Dead (attributable to this cancer dx)	Alive or dead due to cancer
53309518	2	1	1	T2	T3	3	N0	0	unknown	unknown	3	0	1	0	0	1	0	0	6	1	8140/3: Adenocarcinoma, NOS	N/A not first tumor	N/A not first tumor
53309936	2	1	2	T3	T2	2	N1	0	unknown	unknown	1	0	0	0	0	0	0	0	4	1	8480/3: Mucinous adenocarcinoma	N/A not first tumor	N/A not first tumor
53312987	1	1	2	T3	T2	2	N1	1	2	2	1	0	0	0	0	0	0	1	6	1	8140/3: Adenocarcinoma, NOS	Dead (attributable to this cancer dx)	Alive or dead due to cancer
53313060	1	1	1	T2	T3	3	N1	0	unknown	unknown	2	0	1	0	0	1	0	1	20	1	8140/3: Adenocarcinoma, NOS	Dead (attributable to this cancer dx)	Alive or dead due to cancer
53314488	1	1	1	T2	T3	3	N1	0	unknown	unknown	2	0	1	1	0	1	0	1	10	1	8140/3: Adenocarcinoma, NOS	Dead (attributable to this cancer dx)	Alive or dead due to cancer
53700301	2	1	2	T4	T4	2	N1	1	1	1	1	0	0	0	0	1	0	1	48	0	8010/3: Carcinoma, NOS	Alive or dead of other cause	Alive or dead due to cancer
53705102	2	1	1	T3	T3	3	N1	1	1	1	3	0	0	0	0	1	0	1	59	0	8150/3: Pancreatic endocrine tumor, malignant	Alive or dead of other cause	Alive or dead due to cancer
53713741	2	1	2	T3	T2	2	N1	0	unknown	unknown	1	0	0	0	0	0	0	1	1	1	8140/3: Adenocarcinoma, NOS	Dead (attributable to this cancer dx)	Alive or dead due to cancer
53715059	1	1	1	T3	T2	2	N0	1	2	2	1	0	1	0	0	1	0	1	48	1	8500/3: Infiltrating duct carcinoma, NOS	Alive or dead of other cause	Dead (attributable to causes other than this cancer dx)
53718455	2	1	2	T2	T3	3	N0	0	unknown	unknown	2	0	1	0	0	1	0	1	5	1	8140/3: Adenocarcinoma, NOS	Dead (attributable to this cancer dx)	Alive or dead due to cancer
53720050	1	1	1	T3	T2	2	N1	0	unknown	unknown	1	0	0	0	0	1	0	1	32	0	8246/3: Neuroendocrine carcinoma, NOS	Alive or dead of other cause	Alive or dead due to cancer
53727341	1	1	1	T3	T3	3	N1	0	unknown	unknown	2	0	1	0	0	1	0	1	1	1	8140/3: Adenocarcinoma, NOS	Dead (attributable to this cancer dx)	Alive or dead due to cancer
53731096	2	1	1	T2	T2	2	N0	0	2	2	1	0	1	0	0	1	0	1	1	1	8140/3: Adenocarcinoma, NOS	Dead (attributable to this cancer dx)	Alive or dead due to cancer
53731601	2	1	1	T3	T2	2	N0	0	unknown	unknown	1	0	1	0	0	1	0	1	3	1	8140/3: Adenocarcinoma, NOS	Dead (attributable to this cancer dx)	Alive or dead due to cancer
53732702	2	1	1	T4	T4	3	N0	0	unknown	unknown	1	0	1	0	0	0	0	1	2	1	8480/3: Mucinous adenocarcinoma	Dead (attributable to this cancer dx)	Alive or dead due to cancer
53732973	2	1	1	T3	T3	3	N0	0	unknown	unknown	3	0	1	0	0	1	0	1	2	1	8140/3: Adenocarcinoma, NOS	Dead (attributable to this cancer dx)	Alive or dead due to cancer
53735079	1	1	1	T2	T3	3	N0	0	3	3	3	0	1	0	0	1	0	1	10	1	8500/3: Infiltrating duct carcinoma, NOS	Dead (attributable to this cancer dx)	Alive or dead due to cancer
53740105	1	1	1	T3	T3	3	N0	0	unknown	unknown	3	0	1	0	0	1	0	1	19	1	8246/3: Neuroendocrine carcinoma, NOS	Dead (attributable to this cancer dx)	Alive or dead due to cancer
53740174	2	1	2	T2	T2	2	N0	0	unknown	unknown	2	0	1	0	0	1	0	1	3	1	8140/3: Adenocarcinoma, NOS	Dead (attributable to this cancer dx)	Alive or dead due to cancer
53740294	1	1	2	T4	T4	2	N0	0	unknown	unknown	1	0	1	0	0	1	0	1	4	1	8140/3: Adenocarcinoma, NOS	Dead (attributable to this cancer dx)	Alive or dead due to cancer
53743992	2	1	2	T2	T2	2	N0	0	3	3	1	0	1	0	0	0	0	1	9	1	8140/3: Adenocarcinoma, NOS	Dead (attributable to this cancer dx)	Alive or dead due to cancer
53747878	2	1	1	T4	T4	2	N1	0	3	3	2	0	1	0	0	1	1	1	4	1	8500/3: Infiltrating duct carcinoma, NOS	Dead (attributable to this cancer dx)	Alive or dead due to cancer
53754230	2	1	2	T3	T2	2	N0	0	unknown	unknown	1	0	0	0	0	1	1	1	1	1	8140/3: Adenocarcinoma, NOS	Dead (attributable to this cancer dx)	Alive or dead due to cancer
53755183	1	1	1	T2	T3	3	N1	0	unknown	unknown	2	0	1	0	0	1	0	1	17	1	8140/3: Adenocarcinoma, NOS	Dead (attributable to this cancer dx)	Alive or dead due to cancer
53757317	2	1	2	T2	T3	3	N0	0	3	3	3	0	1	0	0	1	0	1	5	1	8140/3: Adenocarcinoma, NOS	Dead (attributable to this cancer dx)	Alive or dead due to cancer
53759523	1	1	1	T3	T3	3	N0	0	unknown	unknown	2	0	1	0	0	1	0	1	8	1	8140/3: Adenocarcinoma, NOS	Dead (missing/unknown COD)	Dead (missing/unknown COD)
53759890	2	1	2	T4	T4	3	N1	0	2	2	2	0	1	1	0	1	1	1	2	1	8140/3: Adenocarcinoma, NOS	Dead (missing/unknown COD)	Dead (missing/unknown COD)
53763119	2	1	1	T3	T2	2	N1	0	unknown	unknown	2	0	1	0	0	1	1	1	2	1	8140/3: Adenocarcinoma, NOS	Dead (attributable to this cancer dx)	Alive or dead due to cancer
53763526	2	1	2	T3	T3	3	N0	0	3	3	1	0	1	0	0	1	0	1	1	1	8140/3: Adenocarcinoma, NOS	Dead (attributable to this cancer dx)	Alive or dead due to cancer
53764997	2	1	1	T4	T4	3	N1	0	unknown	unknown	1	0	0	0	0	1	0	0	2	1	8140/3: Adenocarcinoma, NOS	N/A not first tumor	N/A not first tumor
53765347	2	1	2	T2	T3	3	N0	0	unknown	unknown	2	0	1	0	0	1	0	1	5	1	8140/3: Adenocarcinoma, NOS	Dead (attributable to this cancer dx)	Alive or dead due to cancer
53766412	1	1	2	T3	T1	1	N0	0	unknown	unknown	3	0	0	0	0	1	0	1	3	1	8140/3: Adenocarcinoma, NOS	Dead (attributable to this cancer dx)	Alive or dead due to cancer
53767291	1	1	1	T4	T4	3	N0	1	3	3	2	0	0	0	0	1	0	1	1	1	8140/3: Adenocarcinoma, NOS	Dead (attributable to this cancer dx)	Alive or dead due to cancer
53770373	2	1	2	T2	T2	2	N0	0	2	2	3	0	1	0	0	1	1	1	4	1	8140/3: Adenocarcinoma, NOS	Dead (attributable to this cancer dx)	Alive or dead due to cancer
53777346	2	1	1	T4	T4	3	N0	0	unknown	unknown	2	0	1	0	0	1	1	1	3	1	8140/3: Adenocarcinoma, NOS	Dead (attributable to this cancer dx)	Alive or dead due to cancer
53778400	1	1	2	T3	T2	2	N0	0	unknown	unknown	1	0	1	0	0	0	1	1	17	1	8140/3: Adenocarcinoma, NOS	Dead (attributable to this cancer dx)	Alive or dead due to cancer
53786666	1	1	1	T3	T3	3	N1	0	unknown	unknown	1	0	0	0	0	1	0	1	2	1	8140/3: Adenocarcinoma, NOS	Dead (attributable to this cancer dx)	Alive or dead due to cancer
53786896	2	1	2	T2	T2	2	N0	0	unknown	unknown	1	0	0	1	0	1	0	1	1	1	8140/3: Adenocarcinoma, NOS	Dead (attributable to this cancer dx)	Alive or dead due to cancer
53787688	2	1	2	T3	T3	3	N0	0	unknown	unknown	2	0	1	0	0	1	0	1	1	1	8140/3: Adenocarcinoma, NOS	Dead (attributable to this cancer dx)	Alive or dead due to cancer
53791805	2	1	2	T2	T2	2	N1	0	1	1	1	0	1	0	0	1	0	1	6	1	8140/3: Adenocarcinoma, NOS	Dead (attributable to this cancer dx)	Alive or dead due to cancer
53792728	1	1	1	T3	T3	3	N1	1	unknown	unknown	1	0	1	0	0	1	1	1	49	0	8240/3: Carcinoid tumor, NOS	Alive or dead of other cause	Alive or dead due to cancer
53803120	1	1	1	T3	T2	2	N1	0	unknown	unknown	1	0	1	0	0	1	0	1	10	1	8140/3: Adenocarcinoma, NOS	Dead (attributable to this cancer dx)	Alive or dead due to cancer
53804801	2	1	1	T2	T3	3	N1	0	unknown	unknown	3	0	0	0	0	1	0	1	8	1	8046/3: Non-small cell carcinoma	Dead (attributable to this cancer dx)	Alive or dead due to cancer
53808058	2	1	2	T3	T3	3	N0	0	2	2	3	0	0	0	0	1	1	1	48	0	8140/3: Adenocarcinoma, NOS	Alive or dead of other cause	Alive or dead due to cancer
53812712	1	1	1	T3	T2	2	N0	0	unknown	unknown	1	0	1	0	0	0	0	1	9	1	8140/3: Adenocarcinoma, NOS	Dead (attributable to this cancer dx)	Alive or dead due to cancer
53814415	1	1	2	T3	T2	2	N0	0	unknown	unknown	2	0	0	0	0	1	0	1	1	1	8140/3: Adenocarcinoma, NOS	Dead (attributable to this cancer dx)	Alive or dead due to cancer
53816128	1	1	2	T3	T2	2	N0	0	unknown	unknown	2	0	1	0	0	1	0	1	19	1	8140/3: Adenocarcinoma, NOS	Dead (attributable to this cancer dx)	Alive or dead due to cancer
53816334	1	1	1	T3	T3	3	N1	0	unknown	unknown	1	1	1	0	0	1	0	1	10	1	8140/3: Adenocarcinoma, NOS	Dead (attributable to this cancer dx)	Alive or dead due to cancer
53817050	1	1	1	T2	T3	3	N1	0	unknown	unknown	2	0	1	0	0	1	1	1	3	1	8140/3: Adenocarcinoma, NOS	Dead (attributable to this cancer dx)	Alive or dead due to cancer
53821075	1	1	1	T2	T3	3	N1	0	unknown	unknown	2	0	0	1	0	1	1	1	2	1	8140/3: Adenocarcinoma, NOS	Dead (attributable to this cancer dx)	Alive or dead due to cancer
53825039	1	1	1	T4	T4	3	N0	0	unknown	unknown	2	0	0	0	0	0	1	1	3	1	8140/3: Adenocarcinoma, NOS	Dead (attributable to this cancer dx)	Alive or dead due to cancer
53839390	1	1	1	T3	T3	3	N0	0	unknown	unknown	2	0	0	1	0	1	0	1	1	1	8140/3: Adenocarcinoma, NOS	Dead (attributable to this cancer dx)	Alive or dead due to cancer
53839817	1	1	1	T3	T2	2	N1	0	unknown	unknown	1	0	0	0	0	1	0	1	2	1	8140/3: Adenocarcinoma, NOS	Dead (attributable to this cancer dx)	Alive or dead due to cancer
53843206	1	1	1	T2	T2	2	N0	0	3	3	2	0	1	0	0	1	0	1	10	1	8140/3: Adenocarcinoma, NOS	Dead (attributable to this cancer dx)	Alive or dead due to cancer
53851858	2	1	2	T3	T3	3	N0	0	3	3	1	0	1	0	0	1	0	0	1	1	8140/3: Adenocarcinoma, NOS	N/A not first tumor	N/A not first tumor
53852818	2	1	2	T3	T2	2	N0	0	unknown	unknown	2	0	0	0	0	0	0	0	1	1	8033/3: Pseudosarcomatous carcinoma	N/A not first tumor	N/A not first tumor
53853944	1	1	2	T2	T3	3	N0	0	unknown	unknown	1	0	1	0	0	1	0	1	14	1	8140/3: Adenocarcinoma, NOS	Dead (attributable to this cancer dx)	Alive or dead due to cancer
53863886	2	1	1	T3	T2	2	N0	0	unknown	unknown	2	0	1	0	0	1	0	1	1	1	8140/3: Adenocarcinoma, NOS	Dead (attributable to this cancer dx)	Alive or dead due to cancer
53866005	2	1	2	T2	T2	2	N0	0	unknown	unknown	1	0	0	0	0	1	0	1	7	1	8013/3: Large cell neuroendocrine carcinoma	Dead (attributable to this cancer dx)	Alive or dead due to cancer
53866737	1	1	2	T3	T3	3	N0	0	2	2	1	0	1	0	0	1	0	1	1	1	8140/3: Adenocarcinoma, NOS	Dead (attributable to this cancer dx)	Alive or dead due to cancer
54250674	2	1	2	T2	T2	2	N1	0	unknown	unknown	1	0	1	0	0	1	0	0	17	1	8140/3: Adenocarcinoma, NOS	N/A not first tumor	N/A not first tumor
54251677	1	1	1	T3	T3	3	N0	0	unknown	unknown	1	1	1	1	0	1	0	1	1	1	8010/3: Carcinoma, NOS	Dead (attributable to this cancer dx)	Alive or dead due to cancer
54251956	2	1	1	T2	T2	2	N0	0	unknown	unknown	1	0	1	0	0	1	0	1	38	1	8140/3: Adenocarcinoma, NOS	Dead (attributable to this cancer dx)	Alive or dead due to cancer
54253231	2	1	2	T3	T3	3	N0	0	unknown	unknown	3	0	1	0	0	0	1	1	19	1	8140/3: Adenocarcinoma, NOS	Dead (attributable to this cancer dx)	Alive or dead due to cancer
54255715	2	1	1	T2	T3	3	N0	0	3	3	2	0	1	1	0	1	1	1	2	1	8140/3: Adenocarcinoma, NOS	Alive or dead of other cause	Dead (attributable to causes other than this cancer dx)
54257023	1	1	1	T2	T2	2	N0	0	unknown	unknown	3	0	1	0	0	1	0	1	7	1	8140/3: Adenocarcinoma, NOS	Dead (attributable to this cancer dx)	Alive or dead due to cancer
54260542	2	1	2	T2	T2	2	N0	0	unknown	unknown	2	0	0	0	0	1	0	1	4	1	8140/3: Adenocarcinoma, NOS	Dead (attributable to this cancer dx)	Alive or dead due to cancer
54266251	2	1	1	T4	T4	3	N0	0	1	1	1	0	1	0	0	0	0	1	16	1	8140/3: Adenocarcinoma, NOS	Dead (attributable to this cancer dx)	Alive or dead due to cancer
54270911	2	1	1	T1	T1	1	N0	1	2	2	2	0	0	0	0	1	0	1	42	0	8246/3: Neuroendocrine carcinoma, NOS	Alive or dead of other cause	Alive or dead due to cancer
54274694	1	1	2	T3	T3	3	N0	0	unknown	unknown	2	0	1	0	0	1	1	0	7	1	8481/3: Mucin-producing adenocarcinoma	N/A not first tumor	N/A not first tumor
54275579	1	1	2	T3	T2	2	N0	0	unknown	unknown	1	0	0	0	0	1	0	1	1	1	8140/3: Adenocarcinoma, NOS	Dead (attributable to this cancer dx)	Alive or dead due to cancer
54275601	2	1	1	T2	T2	2	N0	0	unknown	unknown	2	0	1	0	0	1	1	1	1	1	8140/3: Adenocarcinoma, NOS	Dead (attributable to this cancer dx)	Alive or dead due to cancer
54276970	2	1	2	T3	T2	2	N0	0	unknown	unknown	1	0	1	0	0	1	0	0	2	1	8140/3: Adenocarcinoma, NOS	N/A not first tumor	N/A not first tumor
54277908	1	1	2	T2	T2	2	N0	0	unknown	unknown	3	0	1	0	0	1	0	1	2	1	8140/3: Adenocarcinoma, NOS	Dead (attributable to this cancer dx)	Alive or dead due to cancer
54278562	2	1	1	T3	T3	3	N0	0	unknown	unknown	2	0	1	0	0	1	0	0	1	1	8140/3: Adenocarcinoma, NOS	N/A not first tumor	N/A not first tumor
54278639	2	1	1	T2	T3	3	N0	0	unknown	unknown	3	0	0	0	0	1	0	1	34	0	8152/3: Glucagonoma, malignant	Alive or dead of other cause	Alive or dead due to cancer
54281795	2	1	1	T2	T3	3	N0	0	unknown	unknown	3	0	1	0	0	1	0	1	3	1	8140/3: Adenocarcinoma, NOS	Dead (attributable to this cancer dx)	Alive or dead due to cancer
54286782	2	1	1	T2	T3	3	N0	0	1	1	2	0	0	0	0	1	0	1	6	1	8246/3: Neuroendocrine carcinoma, NOS	Dead (attributable to this cancer dx)	Alive or dead due to cancer
54287555	2	1	1	T2	T2	2	N0	0	1	1	1	0	1	1	0	0	0	1	6	1	8480/3: Mucinous adenocarcinoma	Dead (attributable to this cancer dx)	Alive or dead due to cancer
54291176	2	1	1	T4	T4	3	N0	0	3	3	3	0	1	0	0	0	0	1	3	1	8140/3: Adenocarcinoma, NOS	Dead (attributable to this cancer dx)	Alive or dead due to cancer
54296400	2	2	2	T2	T2	2	N1	0	unknown	unknown	3	0	0	0	0	0	1	1	1	1	8140/3: Adenocarcinoma, NOS	Dead (attributable to this cancer dx)	Alive or dead due to cancer
54300280	2	1	2	T4	T4	3	N0	0	unknown	unknown	2	0	0	0	0	1	0	1	1	1	8140/3: Adenocarcinoma, NOS	Dead (attributable to this cancer dx)	Alive or dead due to cancer
54302464	1	1	2	T1	T1	1	N0	0	1	1	1	0	0	0	0	0	1	1	7	1	8140/3: Adenocarcinoma, NOS	Dead (attributable to this cancer dx)	Alive or dead due to cancer
54302604	1	1	2	T1	T1	1	N0	0	3	3	3	0	1	0	0	1	0	1	2	1	8140/3: Adenocarcinoma, NOS	Dead (attributable to this cancer dx)	Alive or dead due to cancer
54307331	2	1	2	T3	T3	3	N0	0	unknown	unknown	1	0	0	0	0	0	1	1	9	1	8140/3: Adenocarcinoma, NOS	Dead (attributable to this cancer dx)	Alive or dead due to cancer
54307386	2	1	1	T2	T3	3	N0	0	unknown	unknown	1	0	0	0	0	1	1	1	5	1	8140/3: Adenocarcinoma, NOS	Dead (attributable to this cancer dx)	Alive or dead due to cancer
54308966	2	1	1	T3	T3	3	N0	1	3	3	2	0	1	0	0	1	0	1	12	1	8560/3: Adenosquamous carcinoma	Dead (attributable to this cancer dx)	Alive or dead due to cancer
54308973	2	1	2	T2	T3	3	N0	0	2	2	2	0	1	0	0	0	1	1	9	1	8140/3: Adenocarcinoma, NOS	Dead (attributable to this cancer dx)	Alive or dead due to cancer
54310759	1	1	2	T4	T4	3	N1	0	unknown	unknown	3	0	0	0	0	1	0	1	4	1	8140/3: Adenocarcinoma, NOS	Dead (attributable to this cancer dx)	Alive or dead due to cancer
54314106	2	1	1	T2	T2	2	N0	0	unknown	unknown	1	0	0	0	0	1	0	1	1	1	8140/3: Adenocarcinoma, NOS	Dead (attributable to this cancer dx)	Alive or dead due to cancer
54314593	2	1	2	T3	T2	2	N1	0	3	3	2	0	1	0	0	0	1	1	8	1	8480/3: Mucinous adenocarcinoma	Dead (attributable to this cancer dx)	Alive or dead due to cancer
54316859	1	1	2	T2	T2	2	N0	0	1	1	2	0	0	1	0	1	0	1	40	0	8240/3: Carcinoid tumor, NOS	Alive or dead of other cause	Alive or dead due to cancer
54320907	2	1	2	T2	T2	2	N1	0	3	3	2	1	1	0	0	1	0	1	18	1	8140/3: Adenocarcinoma, NOS	Dead (attributable to this cancer dx)	Alive or dead due to cancer
54322176	2	1	1	T3	T3	3	N1	0	unknown	unknown	1	0	0	0	0	1	0	0	1	1	8255/3: Adenocarcinoma with mixed subtypes	N/A not first tumor	N/A not first tumor
54323760	2	1	2	T2	T2	2	N0	0	unknown	unknown	1	0	0	1	0	0	1	1	1	1	8140/3: Adenocarcinoma, NOS	Dead (attributable to this cancer dx)	Alive or dead due to cancer
54324182	2	1	1	T2	T3	3	N0	0	unknown	unknown	3	0	0	0	0	1	0	1	3	1	8046/3: Non-small cell carcinoma	Dead (attributable to this cancer dx)	Alive or dead due to cancer
54325887	2	1	2	T3	T3	3	N1	0	unknown	unknown	3	0	0	0	0	1	0	1	1	1	8140/3: Adenocarcinoma, NOS	Dead (attributable to this cancer dx)	Alive or dead due to cancer
54327634	2	1	1	T3	T3	3	N0	0	3	3	2	0	1	0	0	1	0	1	2	0	8140/3: Adenocarcinoma, NOS	Alive or dead of other cause	Alive or dead due to cancer
54332809	1	1	2	T3	T3	3	N0	1	2	2	2	0	0	0	0	0	0	1	15	1	8246/3: Neuroendocrine carcinoma, NOS	Dead (attributable to this cancer dx)	Alive or dead due to cancer
54334028	2	1	1	T4	T4	3	N0	0	1	1	1	0	0	1	0	0	0	1	38	0	8240/3: Carcinoid tumor, NOS	Alive or dead of other cause	Alive or dead due to cancer
54334752	1	1	1	T1	T1	1	N0	0	1	1	3	1	0	1	0	0	0	1	32	1	8246/3: Neuroendocrine carcinoma, NOS	Dead (attributable to this cancer dx)	Alive or dead due to cancer
54339261	2	1	1	T3	T3	3	N1	0	unknown	unknown	3	0	0	0	0	1	0	1	1	1	8140/3: Adenocarcinoma, NOS	Dead (missing/unknown COD)	Dead (missing/unknown COD)
54339711	2	1	1	T3	T3	3	N1	1	3	3	2	0	1	0	0	1	0	1	39	0	8500/3: Infiltrating duct carcinoma, NOS	Alive or dead of other cause	Alive or dead due to cancer
54340362	1	1	1	T4	T4	2	N1	0	unknown	unknown	3	0	1	0	0	1	0	1	6	1	8140/3: Adenocarcinoma, NOS	Dead (attributable to this cancer dx)	Alive or dead due to cancer
54345061	2	1	2	T2	T3	3	N1	0	unknown	unknown	3	0	0	0	0	1	0	1	1	1	8140/3: Adenocarcinoma, NOS	Dead (attributable to this cancer dx)	Alive or dead due to cancer
54348663	1	1	1	T4	T4	3	N1	1	4	3	2	1	1	0	0	1	0	1	2	1	8246/3: Neuroendocrine carcinoma, NOS	Dead (attributable to this cancer dx)	Alive or dead due to cancer
54349354	2	1	1	T3	T3	3	N1	0	unknown	unknown	1	0	1	0	0	0	0	1	7	1	8140/3: Adenocarcinoma, NOS	Dead (attributable to this cancer dx)	Alive or dead due to cancer
54350033	2	3	1	T4	T4	2	N0	0	unknown	unknown	1	0	1	0	0	1	0	1	2	1	8140/3: Adenocarcinoma, NOS	Dead (attributable to this cancer dx)	Alive or dead due to cancer
54351462	1	1	2	T2	T2	2	N1	0	unknown	unknown	1	0	1	0	0	1	0	1	3	1	8140/3: Adenocarcinoma, NOS	Dead (attributable to this cancer dx)	Alive or dead due to cancer
54358063	2	1	2	T4	T4	3	N0	0	2	2	1	0	0	0	0	1	0	1	3	1	8140/3: Adenocarcinoma, NOS	Dead (attributable to this cancer dx)	Alive or dead due to cancer
54363758	1	1	2	T4	T4	2	N0	0	unknown	unknown	1	0	1	0	0	0	1	1	6	1	8140/3: Adenocarcinoma, NOS	Dead (attributable to this cancer dx)	Alive or dead due to cancer
54369483	1	1	2	T2	T3	3	N1	0	3	3	2	0	0	0	0	1	1	1	1	1	8140/3: Adenocarcinoma, NOS	Dead (attributable to this cancer dx)	Alive or dead due to cancer
54373718	2	1	2	T2	T2	2	N0	0	2	2	2	0	1	0	0	0	1	1	7	1	8140/3: Adenocarcinoma, NOS	Dead (attributable to this cancer dx)	Alive or dead due to cancer
54375884	1	1	1	T3	T3	3	N1	1	2	2	3	0	0	0	0	0	1	1	18	1	8140/3: Adenocarcinoma, NOS	Dead (attributable to this cancer dx)	Alive or dead due to cancer
54377287	1	1	1	T3	T3	3	N0	0	unknown	unknown	3	0	1	0	0	1	0	1	7	1	8246/3: Neuroendocrine carcinoma, NOS	Dead (attributable to this cancer dx)	Alive or dead due to cancer
54378584	2	1	1	T2	T2	2	N0	0	2	2	1	1	1	0	0	0	0	1	18	1	8140/3: Adenocarcinoma, NOS	Dead (attributable to this cancer dx)	Alive or dead due to cancer
54381338	2	1	1	T3	T2	2	N0	0	unknown	unknown	2	0	0	0	0	0	0	1	1	1	8140/3: Adenocarcinoma, NOS	Dead (attributable to this cancer dx)	Alive or dead due to cancer
54382929	1	1	1	T3	T3	3	N1	0	3	3	2	0	1	1	0	1	1	1	7	1	8480/3: Mucinous adenocarcinoma	Dead (attributable to this cancer dx)	Alive or dead due to cancer
54383254	2	1	2	T2	T3	3	N1	0	unknown	unknown	2	0	1	0	0	1	0	1	7	1	8140/3: Adenocarcinoma, NOS	Dead (attributable to this cancer dx)	Alive or dead due to cancer
54390270	2	1	1	T4	T4	2	N0	0	unknown	unknown	1	0	0	0	0	1	0	1	2	1	8140/3: Adenocarcinoma, NOS	Dead (attributable to this cancer dx)	Alive or dead due to cancer
54395147	2	1	1	T3	T3	3	N1	0	unknown	unknown	2	0	0	0	0	1	0	1	2	1	8140/3: Adenocarcinoma, NOS	Dead (attributable to this cancer dx)	Alive or dead due to cancer
54396992	1	1	1	T2	T3	3	N0	0	unknown	unknown	2	0	0	0	0	1	0	1	1	1	8140/3: Adenocarcinoma, NOS	Dead (attributable to this cancer dx)	Alive or dead due to cancer
54400451	1	1	2	T4	T4	3	N1	0	unknown	unknown	2	0	1	0	0	1	0	1	10	1	8140/3: Adenocarcinoma, NOS	Dead (attributable to this cancer dx)	Alive or dead due to cancer
54400671	2	3	2	T3	T3	3	N0	0	3	3	1	0	0	0	0	0	0	1	1	1	8140/3: Adenocarcinoma, NOS	Dead (attributable to this cancer dx)	Alive or dead due to cancer
54410186	2	1	1	T2	T3	3	N0	1	1	1	2	0	0	0	0	1	0	1	32	0	8246/3: Neuroendocrine carcinoma, NOS	Alive or dead of other cause	Alive or dead due to cancer
54413574	2	1	1	T2	T3	3	N0	0	unknown	unknown	2	0	1	0	0	0	0	1	33	0	8140/3: Adenocarcinoma, NOS	Alive or dead of other cause	Alive or dead due to cancer
54414271	2	1	2	T2	T3	3	N1	0	unknown	unknown	1	0	0	0	0	1	0	1	2	1	8140/3: Adenocarcinoma, NOS	Dead (attributable to this cancer dx)	Alive or dead due to cancer
54414496	2	1	2	T2	T3	3	N0	0	unknown	unknown	2	1	1	0	0	0	0	0	13	1	8140/3: Adenocarcinoma, NOS	N/A not first tumor	N/A not first tumor
54800349	2	1	1	T3	T2	2	N0	0	unknown	unknown	2	0	0	0	0	0	0	1	4	1	8140/3: Adenocarcinoma, NOS	Dead (attributable to this cancer dx)	Alive or dead due to cancer
54805582	2	1	1	T2	T3	3	N0	0	3	3	3	0	0	0	0	1	0	1	2	1	8140/3: Adenocarcinoma, NOS	Dead (attributable to this cancer dx)	Alive or dead due to cancer
54806141	1	1	2	T3	T2	2	N1	0	2	2	2	1	0	1	0	0	1	1	2	0	8480/3: Mucinous adenocarcinoma	Alive or dead of other cause	Alive or dead due to cancer
54806827	2	1	2	T4	T4	2	N1	0	unknown	unknown	2	0	1	0	0	0	1	1	7	1	8140/3: Adenocarcinoma, NOS	Dead (attributable to this cancer dx)	Alive or dead due to cancer
54807418	2	1	1	T2	T2	2	N0	0	unknown	unknown	1	0	1	0	0	1	0	1	30	0	8140/3: Adenocarcinoma, NOS	Alive or dead of other cause	Alive or dead due to cancer
54810801	2	1	1	T4	T4	3	N0	0	unknown	unknown	2	1	1	1	0	1	0	1	9	1	8140/3: Adenocarcinoma, NOS	Dead (attributable to this cancer dx)	Alive or dead due to cancer
54813314	1	1	2	T3	T2	2	N1	0	unknown	unknown	1	0	0	0	0	1	0	1	2	1	8140/3: Adenocarcinoma, NOS	Dead (attributable to this cancer dx)	Alive or dead due to cancer
54817443	1	1	2	T3	T3	3	N0	1	3	3	2	1	1	0	0	0	0	1	13	1	8140/3: Adenocarcinoma, NOS	Dead (attributable to this cancer dx)	Alive or dead due to cancer
54818115	1	1	2	T3	T2	2	N1	1	3	3	3	0	0	0	0	1	0	1	27	0	8246/3: Neuroendocrine carcinoma, NOS	Alive or dead of other cause	Alive or dead due to cancer
54818496	2	1	1	T3	T2	2	N0	0	unknown	unknown	2	0	0	0	0	1	0	1	3	1	8140/3: Adenocarcinoma, NOS	Dead (attributable to this cancer dx)	Alive or dead due to cancer
54819824	2	1	2	T1	T1	1	N0	0	unknown	unknown	3	0	0	0	0	1	0	1	1	1	8140/3: Adenocarcinoma, NOS	Dead (missing/unknown COD)	Dead (missing/unknown COD)
54821092	2	1	1	T2	T3	3	N0	0	unknown	unknown	2	1	1	1	0	1	0	1	2	1	8010/3: Carcinoma, NOS	Dead (attributable to this cancer dx)	Alive or dead due to cancer
54821951	1	1	2	T2	T3	3	N0	0	unknown	unknown	2	0	1	0	0	1	0	1	3	1	8246/3: Neuroendocrine carcinoma, NOS	Dead (attributable to this cancer dx)	Alive or dead due to cancer
54822956	2	1	2	T3	T3	3	N0	0	unknown	unknown	1	0	1	0	0	0	1	1	5	1	8140/3: Adenocarcinoma, NOS	Alive or dead of other cause	Dead (attributable to causes other than this cancer dx)
54823856	2	1	1	T3	T3	3	N1	0	3	3	2	0	1	0	0	1	1	1	12	1	8140/3: Adenocarcinoma, NOS	Dead (attributable to this cancer dx)	Alive or dead due to cancer
54826598	2	1	2	T2	T2	2	N0	0	unknown	unknown	1	0	1	0	0	1	0	0	2	1	8140/3: Adenocarcinoma, NOS	N/A not first tumor	N/A not first tumor
54828580	2	1	2	T3	T2	2	N1	1	2	2	1	0	0	0	0	0	0	1	7	1	8140/3: Adenocarcinoma, NOS	Dead (attributable to this cancer dx)	Alive or dead due to cancer
54830774	1	1	1	T2	T3	3	N0	0	4	3	1	0	0	0	0	1	0	1	7	1	8246/3: Neuroendocrine carcinoma, NOS	Dead (attributable to this cancer dx)	Alive or dead due to cancer
54831286	2	1	2	T4	T4	2	N0	0	unknown	unknown	1	0	0	0	0	0	1	1	4	1	8140/3: Adenocarcinoma, NOS	Dead (attributable to this cancer dx)	Alive or dead due to cancer
54832664	2	1	2	T3	T3	3	N1	0	3	3	1	0	0	0	0	1	1	1	1	1	8140/3: Adenocarcinoma, NOS	Dead (attributable to this cancer dx)	Alive or dead due to cancer
54833223	2	1	2	T3	T3	3	N0	0	1	1	1	0	0	0	0	1	0	1	44	0	8140/3: Adenocarcinoma, NOS	Alive or dead of other cause	Alive or dead due to cancer
54835191	2	1	2	T2	T3	3	N0	0	unknown	unknown	2	0	1	0	0	1	1	1	3	1	8140/3: Adenocarcinoma, NOS	Dead (attributable to this cancer dx)	Alive or dead due to cancer
54836988	2	1	1	T4	T4	3	N0	0	unknown	unknown	2	1	1	0	0	0	0	0	3	1	8140/3: Adenocarcinoma, NOS	N/A not first tumor	N/A not first tumor
54838396	2	1	1	T3	T2	2	N0	0	unknown	unknown	1	0	0	0	0	0	0	1	2	1	8140/3: Adenocarcinoma, NOS	Dead (attributable to this cancer dx)	Alive or dead due to cancer
54840153	2	1	1	T2	T2	2	N0	0	unknown	unknown	1	0	1	0	0	1	0	1	11	1	8560/3: Adenosquamous carcinoma	Dead (attributable to this cancer dx)	Alive or dead due to cancer
54844199	2	1	2	T2	T3	3	N1	0	unknown	unknown	2	0	1	0	0	1	1	1	1	1	8140/3: Adenocarcinoma, NOS	Dead (attributable to this cancer dx)	Alive or dead due to cancer
54847587	2	1	1	T4	T4	2	N1	0	unknown	unknown	3	1	1	0	0	0	0	1	13	1	8140/3: Adenocarcinoma, NOS	Dead (attributable to this cancer dx)	Alive or dead due to cancer
54850463	2	1	1	T2	T3	3	N0	0	unknown	unknown	2	1	0	0	1	1	0	1	5	1	8140/3: Adenocarcinoma, NOS	Dead (missing/unknown COD)	Dead (missing/unknown COD)
54857738	2	1	1	T2	T3	3	N0	0	unknown	unknown	2	0	0	0	0	1	1	1	1	1	8140/3: Adenocarcinoma, NOS	Dead (attributable to this cancer dx)	Alive or dead due to cancer
54857901	2	1	1	T3	T3	3	N1	0	3	3	1	0	1	0	0	1	0	1	7	1	8140/3: Adenocarcinoma, NOS	Dead (attributable to this cancer dx)	Alive or dead due to cancer
54863051	1	1	2	T3	T2	2	N0	0	3	3	1	0	1	0	0	1	0	1	17	0	8140/3: Adenocarcinoma, NOS	Alive or dead of other cause	Alive or dead due to cancer
54863792	1	1	1	T3	T2	2	N0	0	unknown	unknown	1	0	1	0	0	1	0	1	8	1	8500/3: Infiltrating duct carcinoma, NOS	Dead (attributable to this cancer dx)	Alive or dead due to cancer
54865373	2	1	2	T4	T4	3	N1	0	2	2	3	0	1	0	0	0	1	1	27	1	8140/3: Adenocarcinoma, NOS	Dead (missing/unknown COD)	Dead (missing/unknown COD)
54865890	2	1	1	T2	T2	2	N1	0	unknown	unknown	1	0	1	0	0	1	0	1	9	1	8490/3: Signet ring cell carcinoma	Dead (attributable to this cancer dx)	Alive or dead due to cancer
54867938	1	1	1	T3	T2	2	N1	0	unknown	unknown	2	0	1	0	0	1	0	1	29	1	8481/3: Mucin-producing adenocarcinoma	Dead (attributable to this cancer dx)	Alive or dead due to cancer
54869213	2	1	2	T2	T3	3	N1	0	2	2	2	0	1	0	0	0	1	1	3	1	8500/3: Infiltrating duct carcinoma, NOS	Dead (attributable to this cancer dx)	Alive or dead due to cancer
54869869	1	1	2	T2	T3	3	N0	0	unknown	unknown	3	0	1	0	0	1	0	1	11	1	8140/3: Adenocarcinoma, NOS	Dead (attributable to this cancer dx)	Alive or dead due to cancer
54870311	2	1	1	T3	T3	3	N1	0	unknown	unknown	1	0	0	0	0	1	0	1	29	0	8140/3: Adenocarcinoma, NOS	Alive or dead of other cause	Alive or dead due to cancer
54873051	1	1	2	T2	T3	3	N0	0	unknown	unknown	2	0	1	1	0	0	0	1	26	0	8140/3: Adenocarcinoma, NOS	Alive or dead of other cause	Alive or dead due to cancer
54875150	2	1	1	T2	T3	3	N0	0	unknown	unknown	1	0	1	0	0	1	0	1	2	1	8560/3: Adenosquamous carcinoma	Dead (attributable to this cancer dx)	Alive or dead due to cancer
54877816	2	1	2	T3	T2	2	N0	0	3	3	1	0	1	0	0	1	0	1	14	1	8140/3: Adenocarcinoma, NOS	Dead (attributable to this cancer dx)	Alive or dead due to cancer
54878307	2	1	2	T2	T3	3	N0	0	unknown	unknown	2	0	0	0	0	1	0	1	8	1	8140/3: Adenocarcinoma, NOS	Dead (attributable to this cancer dx)	Alive or dead due to cancer
54878377	2	1	2	T2	T2	2	N0	0	unknown	unknown	1	0	1	0	0	0	1	1	15	1	8481/3: Mucin-producing adenocarcinoma	Dead (attributable to this cancer dx)	Alive or dead due to cancer
54878931	1	1	1	T4	T4	3	N1	0	unknown	unknown	2	0	1	0	0	1	0	1	15	1	8140/3: Adenocarcinoma, NOS	Dead (attributable to this cancer dx)	Alive or dead due to cancer
54880778	2	1	1	T3	T3	3	N1	0	unknown	unknown	3	0	0	0	0	1	0	1	2	1	8000/3: Neoplasm, malignant	Dead (attributable to this cancer dx)	Alive or dead due to cancer
54882027	2	1	1	T2	T2	2	N1	0	unknown	unknown	2	0	0	0	0	1	1	1	2	1	8481/3: Mucin-producing adenocarcinoma	Dead (attributable to this cancer dx)	Alive or dead due to cancer
54883638	2	1	2	T2	T3	3	N1	0	unknown	unknown	1	0	0	0	0	1	0	1	2	1	8140/3: Adenocarcinoma, NOS	Dead (attributable to this cancer dx)	Alive or dead due to cancer
54884894	2	1	2	T2	T2	2	N0	0	unknown	unknown	3	0	1	0	0	1	0	1	6	1	8140/3: Adenocarcinoma, NOS	Dead (attributable to this cancer dx)	Alive or dead due to cancer
54886321	2	1	1	T2	T2	2	N0	0	unknown	unknown	1	0	1	0	0	1	0	1	5	1	8140/3: Adenocarcinoma, NOS	Dead (attributable to this cancer dx)	Alive or dead due to cancer
54887336	2	1	1	T2	T2	2	N1	0	unknown	unknown	2	0	0	0	0	1	0	1	2	1	8480/3: Mucinous adenocarcinoma	Dead (attributable to this cancer dx)	Alive or dead due to cancer
54887581	2	1	1	T2	T2	2	N0	0	unknown	unknown	2	0	1	0	0	0	1	1	3	1	8480/3: Mucinous adenocarcinoma	Dead (attributable to this cancer dx)	Alive or dead due to cancer
54890110	1	1	2	T2	T2	2	N0	0	unknown	unknown	1	0	1	0	0	1	0	1	6	1	8140/3: Adenocarcinoma, NOS	Dead (attributable to this cancer dx)	Alive or dead due to cancer
54892528	1	1	1	T4	T4	2	N0	0	unknown	unknown	1	0	1	0	0	1	0	1	11	1	8140/3: Adenocarcinoma, NOS	Dead (attributable to this cancer dx)	Alive or dead due to cancer
54905715	1	1	1	T2	T2	2	N0	0	unknown	unknown	2	0	1	0	0	1	1	1	19	1	8140/3: Adenocarcinoma, NOS	Dead (attributable to this cancer dx)	Alive or dead due to cancer
54910717	1	1	2	T1	T1	1	N1	0	unknown	unknown	2	0	0	0	0	1	1	1	1	1	8480/3: Mucinous adenocarcinoma	Dead (attributable to this cancer dx)	Alive or dead due to cancer
54910932	2	1	1	T2	T3	3	N1	0	3	3	2	0	0	0	0	1	1	1	2	1	8140/3: Adenocarcinoma, NOS	Dead (attributable to this cancer dx)	Alive or dead due to cancer
54912700	2	1	1	T4	T4	3	N0	1	2	2	2	0	0	0	0	1	0	0	22	0	8246/3: Neuroendocrine carcinoma, NOS	N/A not first tumor	N/A not first tumor
54916759	2	1	2	T2	T2	2	N0	0	unknown	unknown	1	0	1	0	0	1	0	1	4	0	8140/3: Adenocarcinoma, NOS	Alive or dead of other cause	Alive or dead due to cancer
54916880	2	1	1	T2	T2	2	N1	0	unknown	unknown	1	0	1	0	0	0	1	1	23	0	8140/3: Adenocarcinoma, NOS	Alive or dead of other cause	Alive or dead due to cancer
54923359	2	1	2	T2	T2	2	N0	0	unknown	unknown	2	0	1	0	0	0	1	1	6	1	8140/3: Adenocarcinoma, NOS	Dead (attributable to this cancer dx)	Alive or dead due to cancer
54925008	2	1	1	T3	T2	2	N1	0	unknown	unknown	2	0	1	0	0	0	1	1	3	1	8140/3: Adenocarcinoma, NOS	Dead (attributable to this cancer dx)	Alive or dead due to cancer
54929300	2	1	2	T4	T4	3	N0	0	2	2	3	0	1	0	0	0	1	1	7	1	8140/3: Adenocarcinoma, NOS	Dead (attributable to this cancer dx)	Alive or dead due to cancer
54930464	2	1	2	T3	T2	2	N1	0	2	2	3	0	0	1	0	0	1	1	2	1	8480/3: Mucinous adenocarcinoma	Dead (attributable to this cancer dx)	Alive or dead due to cancer
54937064	1	1	1	T4	T4	3	N1	0	2	2	1	1	1	0	0	1	0	1	3	1	8140/3: Adenocarcinoma, NOS	Dead (attributable to this cancer dx)	Alive or dead due to cancer
54944318	1	1	2	T2	T2	2	N1	0	3	3	1	0	0	0	0	1	1	1	1	1	8140/3: Adenocarcinoma, NOS	Dead (attributable to this cancer dx)	Alive or dead due to cancer
54950922	1	1	1	T4	T4	3	N1	0	3	3	3	0	1	0	0	1	0	1	8	1	8140/3: Adenocarcinoma, NOS	Dead (missing/unknown COD)	Dead (missing/unknown COD)
54952260	2	1	1	T3	T2	2	N1	1	2	2	1	0	1	0	0	1	0	1	6	1	8500/3: Infiltrating duct carcinoma, NOS	Dead (attributable to this cancer dx)	Alive or dead due to cancer
54954363	2	1	1	T3	T2	2	N1	0	2	2	1	0	0	0	0	1	0	1	4	1	8500/3: Infiltrating duct carcinoma, NOS	Dead (attributable to this cancer dx)	Alive or dead due to cancer
54955131	1	1	1	T4	T4	3	N1	0	3	3	1	0	1	0	0	1	0	1	2	1	8560/3: Adenosquamous carcinoma	Dead (attributable to this cancer dx)	Alive or dead due to cancer
54956053	2	1	1	T3	T3	3	N0	0	unknown	unknown	2	0	0	0	0	0	0	1	1	0	8140/3: Adenocarcinoma, NOS	Alive or dead of other cause	Alive or dead due to cancer
54956192	2	1	1	T2	T2	2	N1	0	unknown	unknown	2	0	0	0	0	1	1	1	1	1	8140/3: Adenocarcinoma, NOS	Dead (attributable to this cancer dx)	Alive or dead due to cancer
54965031	2	1	2	T3	T3	3	N1	0	unknown	unknown	2	0	1	0	0	1	1	1	6	1	8140/3: Adenocarcinoma, NOS	Dead (attributable to this cancer dx)	Alive or dead due to cancer
54965577	2	1	2	T3	T2	2	N0	0	unknown	unknown	1	0	0	0	0	0	0	1	19	1	8140/3: Adenocarcinoma, NOS	Dead (attributable to this cancer dx)	Alive or dead due to cancer
54968163	2	1	2	T4	T4	3	N1	0	unknown	unknown	1	0	0	0	0	1	0	1	8	1	8500/3: Infiltrating duct carcinoma, NOS	Dead (attributable to this cancer dx)	Alive or dead due to cancer
54968516	1	1	2	T3	T2	2	N0	0	2	2	1	0	1	0	0	1	0	1	19	0	8140/3: Adenocarcinoma, NOS	Alive or dead of other cause	Alive or dead due to cancer
54969087	2	1	1	T2	T2	2	N1	0	unknown	unknown	2	0	1	0	0	1	0	1	3	1	8140/3: Adenocarcinoma, NOS	Dead (attributable to this cancer dx)	Alive or dead due to cancer
54969280	2	1	2	T3	T1	1	N0	0	3	3	3	0	1	0	0	1	0	1	19	0	8574/3: Adenocarcinoma with neuroendocrine differentiation	Alive or dead of other cause	Alive or dead due to cancer
54969848	1	1	1	T2	T2	2	N0	0	unknown	unknown	3	0	0	0	0	1	0	1	1	1	8490/3: Signet ring cell carcinoma	Dead (attributable to this cancer dx)	Alive or dead due to cancer
54969985	1	1	1	T3	T3	3	N0	0	3	3	2	0	0	0	0	1	0	1	4	1	8490/3: Signet ring cell carcinoma	Dead (attributable to this cancer dx)	Alive or dead due to cancer
54970246	2	1	2	T4	T4	3	N1	0	unknown	unknown	1	0	1	0	0	1	0	1	1	1	8140/3: Adenocarcinoma, NOS	Dead (attributable to this cancer dx)	Alive or dead due to cancer
55352519	1	1	1	T2	T3	3	N0	0	unknown	unknown	3	0	1	0	0	1	0	1	5	1	8140/3: Adenocarcinoma, NOS	Dead (attributable to this cancer dx)	Alive or dead due to cancer
55354114	2	1	1	T4	T4	3	N0	0	unknown	unknown	3	0	1	0	0	1	0	1	11	1	8140/3: Adenocarcinoma, NOS	Dead (missing/unknown COD)	Dead (missing/unknown COD)
55354160	2	1	2	T2	T2	2	N0	0	2	2	1	1	1	1	0	0	0	1	12	1	8500/3: Infiltrating duct carcinoma, NOS	Dead (attributable to this cancer dx)	Alive or dead due to cancer
55359531	1	1	1	T4	T4	2	N0	0	unknown	unknown	1	1	1	0	0	0	1	1	16	0	8140/3: Adenocarcinoma, NOS	Alive or dead of other cause	Alive or dead due to cancer
55364470	2	1	2	T2	T2	2	N0	0	2	2	2	0	1	0	0	1	1	1	7	1	8140/3: Adenocarcinoma, NOS	Dead (attributable to this cancer dx)	Alive or dead due to cancer
55368300	2	1	1	T4	T4	3	N0	0	2	2	2	0	1	0	0	0	1	1	13	1	8140/3: Adenocarcinoma, NOS	Dead (attributable to this cancer dx)	Alive or dead due to cancer
55368745	2	1	2	T2	T2	2	N0	0	unknown	unknown	2	0	1	0	0	1	1	1	7	1	8140/3: Adenocarcinoma, NOS	Dead (attributable to this cancer dx)	Alive or dead due to cancer
55369181	2	1	1	T2	T3	3	N0	0	unknown	unknown	2	0	0	0	0	1	0	1	3	1	8140/3: Adenocarcinoma, NOS	Dead (attributable to this cancer dx)	Alive or dead due to cancer
55370566	2	1	2	T3	T3	3	N0	0	2	2	1	0	1	0	0	1	0	1	20	1	8140/3: Adenocarcinoma, NOS	Dead (attributable to this cancer dx)	Alive or dead due to cancer
55370724	1	1	1	T2	T2	2	N1	0	unknown	unknown	2	0	0	0	0	1	0	1	2	1	8140/3: Adenocarcinoma, NOS	Dead (attributable to this cancer dx)	Alive or dead due to cancer
55371260	1	1	1	T4	T4	2	N0	0	unknown	unknown	2	0	1	0	0	1	0	1	3	1	8010/3: Carcinoma, NOS	Dead (attributable to this cancer dx)	Alive or dead due to cancer
55372151	2	1	2	T4	T4	3	N0	0	unknown	unknown	2	0	1	0	0	1	0	1	20	1	8140/3: Adenocarcinoma, NOS	Dead (attributable to this cancer dx)	Alive or dead due to cancer
55372368	1	1	1	T3	T3	3	N0	0	unknown	unknown	1	0	1	0	0	1	0	1	5	1	8140/3: Adenocarcinoma, NOS	Dead (attributable to this cancer dx)	Alive or dead due to cancer
55375412	1	1	2	T3	T3	3	N1	0	unknown	unknown	2	0	1	0	0	0	0	1	2	1	8140/3: Adenocarcinoma, NOS	Dead (attributable to this cancer dx)	Alive or dead due to cancer
55375938	1	1	1	T2	T2	2	N1	0	unknown	unknown	2	0	0	0	0	1	0	1	20	0	8140/3: Adenocarcinoma, NOS	Alive or dead of other cause	Alive or dead due to cancer
55376016	1	1	1	T2	T2	2	N1	0	unknown	unknown	1	0	1	0	0	1	0	1	5	1	8500/3: Infiltrating duct carcinoma, NOS	Dead (attributable to this cancer dx)	Alive or dead due to cancer
55379051	2	1	1	T4	T4	3	N1	0	unknown	unknown	1	1	0	0	0	1	0	1	2	1	8140/3: Adenocarcinoma, NOS	Dead (attributable to this cancer dx)	Alive or dead due to cancer
55379646	1	1	1	T3	T3	3	N1	0	unknown	unknown	3	0	1	0	0	1	0	1	46	1	8240/3: Carcinoid tumor, NOS	Dead (attributable to this cancer dx)	Alive or dead due to cancer
55379794	1	1	1	T4	T4	3	N0	0	3	3	2	0	1	0	0	1	0	1	27	1	8574/3: Adenocarcinoma with neuroendocrine differentiation	Dead (attributable to this cancer dx)	Alive or dead due to cancer
55381138	1	1	1	T3	T3	3	N1	0	unknown	unknown	2	0	0	0	0	1	0	1	8	1	8246/3: Neuroendocrine carcinoma, NOS	Dead (attributable to this cancer dx)	Alive or dead due to cancer
55381452	2	1	1	T2	T2	2	N1	0	unknown	unknown	1	0	1	0	0	1	1	1	6	1	8140/3: Adenocarcinoma, NOS	Dead (attributable to this cancer dx)	Alive or dead due to cancer
55382926	1	1	1	T4	T4	3	N0	0	2	2	1	0	1	0	0	1	0	1	7	1	8140/3: Adenocarcinoma, NOS	Dead (attributable to this cancer dx)	Alive or dead due to cancer
55383694	2	1	2	T3	T2	2	N0	0	unknown	unknown	1	0	0	0	0	1	0	1	7	1	8140/3: Adenocarcinoma, NOS	Dead (attributable to this cancer dx)	Alive or dead due to cancer
55384036	2	1	2	T3	T3	3	N1	0	unknown	unknown	1	0	0	0	0	0	1	1	6	1	8140/3: Adenocarcinoma, NOS	Dead (attributable to this cancer dx)	Alive or dead due to cancer
55386095	2	1	2	T1	T1	1	N0	0	unknown	unknown	1	0	0	0	0	1	0	1	4	1	8140/3: Adenocarcinoma, NOS	Dead (attributable to this cancer dx)	Alive or dead due to cancer
55388413	1	1	2	T2	T3	3	N1	0	unknown	unknown	3	0	0	1	0	0	0	1	3	1	8140/3: Adenocarcinoma, NOS	Dead (attributable to this cancer dx)	Alive or dead due to cancer
55392629	2	1	2	T3	T2	2	N1	0	1	1	1	0	0	0	0	1	0	1	7	1	8140/3: Adenocarcinoma, NOS	Dead (attributable to this cancer dx)	Alive or dead due to cancer
55395099	2	1	1	T2	T2	2	N0	0	unknown	unknown	3	0	0	0	0	1	0	1	1	1	8010/3: Carcinoma, NOS	Dead (attributable to this cancer dx)	Alive or dead due to cancer
55396773	2	1	2	T3	T2	2	N0	0	unknown	unknown	1	0	0	0	0	0	1	1	7	1	8140/3: Adenocarcinoma, NOS	Alive or dead of other cause	Dead (attributable to causes other than this cancer dx)
55397786	2	1	2	T4	T4	3	N1	0	unknown	unknown	2	0	1	0	0	1	0	1	3	1	8140/3: Adenocarcinoma, NOS	Dead (attributable to this cancer dx)	Alive or dead due to cancer
55404470	2	1	2	T2	T2	2	N0	0	unknown	unknown	1	0	1	0	0	1	0	1	5	1	8140/3: Adenocarcinoma, NOS	Dead (attributable to this cancer dx)	Alive or dead due to cancer
55407048	2	1	1	T3	T3	3	N0	0	1	1	3	0	0	0	0	1	0	1	2	1	8480/3: Mucinous adenocarcinoma	Dead (attributable to this cancer dx)	Alive or dead due to cancer
55409554	2	1	2	T3	T2	2	N1	0	2	2	1	0	1	0	0	0	1	1	10	1	8140/3: Adenocarcinoma, NOS	Dead (attributable to this cancer dx)	Alive or dead due to cancer
55410817	2	1	1	T2	T2	2	N1	0	unknown	unknown	2	0	1	0	0	0	1	1	10	1	8140/3: Adenocarcinoma, NOS	Dead (attributable to this cancer dx)	Alive or dead due to cancer
55414489	1	1	1	T4	T4	2	N0	0	unknown	unknown	2	0	1	0	0	0	0	1	13	1	8140/3: Adenocarcinoma, NOS	Dead (attributable to this cancer dx)	Alive or dead due to cancer
55417290	1	1	2	T2	T3	3	N0	0	unknown	unknown	1	0	1	0	0	1	1	1	10	1	8140/3: Adenocarcinoma, NOS	Dead (attributable to this cancer dx)	Alive or dead due to cancer
55418301	1	1	1	T2	T3	3	N0	0	unknown	unknown	2	0	1	1	0	1	0	1	2	1	8500/3: Infiltrating duct carcinoma, NOS	Dead (attributable to this cancer dx)	Alive or dead due to cancer
55421348	1	1	2	T3	T3	3	N0	0	unknown	unknown	2	0	1	0	0	1	0	1	1	1	8140/3: Adenocarcinoma, NOS	Dead (attributable to this cancer dx)	Alive or dead due to cancer
55424164	2	1	2	T2	T2	2	N0	0	unknown	unknown	1	0	0	0	0	1	0	1	2	1	8140/3: Adenocarcinoma, NOS	Dead (attributable to this cancer dx)	Alive or dead due to cancer
55425463	2	1	2	T2	T3	3	N0	0	2	2	2	0	1	1	0	0	0	1	14	1	8140/3: Adenocarcinoma, NOS	Dead (missing/unknown COD)	Dead (missing/unknown COD)
55425493	2	1	1	T2	T3	3	N0	0	unknown	unknown	2	0	0	0	0	1	0	1	2	1	8140/3: Adenocarcinoma, NOS	Dead (missing/unknown COD)	Dead (missing/unknown COD)
55430396	2	1	1	T2	T2	2	N0	0	unknown	unknown	1	0	0	0	0	1	1	1	3	1	8140/3: Adenocarcinoma, NOS	Dead (attributable to this cancer dx)	Alive or dead due to cancer
55431693	2	1	2	T2	T3	3	N0	0	unknown	unknown	2	0	0	0	0	1	0	1	4	1	8140/3: Adenocarcinoma, NOS	Dead (attributable to this cancer dx)	Alive or dead due to cancer
55432055	2	1	1	T3	T3	3	N0	0	3	3	2	0	1	0	0	1	0	1	1	1	8560/3: Adenosquamous carcinoma	Dead (attributable to this cancer dx)	Alive or dead due to cancer
55433400	2	1	2	T2	T2	2	N0	0	unknown	unknown	1	0	0	0	0	1	0	1	2	1	8140/3: Adenocarcinoma, NOS	Dead (attributable to this cancer dx)	Alive or dead due to cancer
55434387	1	1	2	T2	T3	3	N1	0	unknown	unknown	1	0	0	0	0	1	0	1	13	0	8550/3: Acinar cell carcinoma	Alive or dead of other cause	Alive or dead due to cancer
55435498	1	1	1	T4	T4	2	N1	0	unknown	unknown	2	0	1	0	0	1	0	1	2	1	8140/3: Adenocarcinoma, NOS	Dead (attributable to this cancer dx)	Alive or dead due to cancer
55435622	1	1	2	T3	T3	3	N1	1	1	1	1	0	0	0	0	1	0	1	14	0	8246/3: Neuroendocrine carcinoma, NOS	Alive or dead of other cause	Alive or dead due to cancer
55438658	2	1	2	T3	T3	3	N1	0	unknown	unknown	1	0	1	0	0	1	0	1	2	1	8010/3: Carcinoma, NOS	Dead (attributable to this cancer dx)	Alive or dead due to cancer
55438877	2	1	2	T3	T3	3	N1	0	unknown	unknown	3	0	1	0	0	0	1	1	8	1	8140/3: Adenocarcinoma, NOS	Dead (attributable to this cancer dx)	Alive or dead due to cancer
55443057	2	1	1	T3	T2	2	N0	0	unknown	unknown	2	0	1	0	0	1	1	1	1	1	8140/3: Adenocarcinoma, NOS	Dead (attributable to this cancer dx)	Alive or dead due to cancer
55443548	2	1	2	T3	T2	2	N1	0	unknown	unknown	1	0	0	0	0	1	0	1	4	1	8140/3: Adenocarcinoma, NOS	Dead (attributable to this cancer dx)	Alive or dead due to cancer
55443823	1	1	1	T3	T3	3	N1	0	unknown	unknown	3	0	1	0	0	0	0	1	7	1	8140/3: Adenocarcinoma, NOS	Dead (attributable to this cancer dx)	Alive or dead due to cancer
55444402	2	1	1	T3	T3	3	N0	0	3	3	2	0	1	0	0	1	0	1	10	1	8140/3: Adenocarcinoma, NOS	Dead (attributable to this cancer dx)	Alive or dead due to cancer
55449217	2	1	1	T4	T4	2	N1	0	3	3	1	0	0	0	0	1	0	1	5	1	8140/3: Adenocarcinoma, NOS	Dead (attributable to this cancer dx)	Alive or dead due to cancer
55458871	2	1	1	T2	T3	3	N0	0	unknown	unknown	1	0	0	0	0	1	0	1	1	1	8140/3: Adenocarcinoma, NOS	Dead (attributable to this cancer dx)	Alive or dead due to cancer
55462536	2	1	1	T4	T4	3	N0	0	3	3	2	0	0	0	0	1	0	1	5	1	8140/3: Adenocarcinoma, NOS	Dead (attributable to this cancer dx)	Alive or dead due to cancer
55462625	2	1	2	T2	T2	2	N0	0	unknown	unknown	2	0	0	0	0	1	0	1	3	1	8140/3: Adenocarcinoma, NOS	Dead (attributable to this cancer dx)	Alive or dead due to cancer
55468320	2	1	1	T4	T4	3	N1	0	3	3	1	0	1	0	0	1	0	1	4	1	8140/3: Adenocarcinoma, NOS	Dead (attributable to this cancer dx)	Alive or dead due to cancer
55468609	2	1	2	T2	T2	2	N0	0	unknown	unknown	2	0	1	0	0	1	0	1	3	1	8140/3: Adenocarcinoma, NOS	Dead (attributable to this cancer dx)	Alive or dead due to cancer
55469818	2	1	1	T3	T3	3	N1	0	unknown	unknown	2	0	0	1	0	1	1	1	3	1	8140/3: Adenocarcinoma, NOS	Dead (attributable to this cancer dx)	Alive or dead due to cancer
55470659	1	1	2	T3	T3	3	N0	0	unknown	unknown	2	0	1	0	0	1	0	1	4	1	8140/3: Adenocarcinoma, NOS	Dead (attributable to this cancer dx)	Alive or dead due to cancer
55470883	2	1	2	T4	T4	2	N1	0	unknown	unknown	1	0	1	0	0	1	0	1	13	0	8140/3: Adenocarcinoma, NOS	Alive or dead of other cause	Alive or dead due to cancer
55474425	2	1	1	T3	T3	3	N1	1	2	2	2	1	1	0	0	0	0	1	14	0	8480/3: Mucinous adenocarcinoma	Alive or dead of other cause	Alive or dead due to cancer
55476333	2	1	2	T2	T3	3	N0	0	3	3	2	0	1	0	0	1	1	1	2	1	8500/3: Infiltrating duct carcinoma, NOS	Dead (attributable to this cancer dx)	Alive or dead due to cancer
55478231	1	1	1	T3	T2	2	N0	0	2	2	2	0	1	0	0	1	0	1	2	1	8500/3: Infiltrating duct carcinoma, NOS	Dead (attributable to this cancer dx)	Alive or dead due to cancer
55479034	2	1	2	T4	T4	3	N0	0	unknown	unknown	1	0	1	0	0	1	0	1	7	1	8010/3: Carcinoma, NOS	Dead (attributable to this cancer dx)	Alive or dead due to cancer
55482301	1	1	2	T2	T2	2	N1	0	unknown	unknown	2	0	1	0	0	1	0	1	15	1	8140/3: Adenocarcinoma, NOS	Dead (attributable to this cancer dx)	Alive or dead due to cancer
55482510	2	1	2	T2	T3	3	N1	1	unknown	unknown	2	0	1	0	0	1	0	1	10	1	8140/3: Adenocarcinoma, NOS	Dead (attributable to this cancer dx)	Alive or dead due to cancer
55484516	2	1	2	T4	T4	2	N0	0	unknown	unknown	1	0	1	0	0	1	0	1	5	1	8480/3: Mucinous adenocarcinoma	Dead (missing/unknown COD)	Dead (missing/unknown COD)
55485664	1	1	1	T2	T3	3	N0	0	unknown	unknown	2	0	1	0	0	1	0	1	1	1	8140/3: Adenocarcinoma, NOS	Dead (attributable to this cancer dx)	Alive or dead due to cancer
55490121	2	1	1	T2	T3	3	N0	0	2	2	3	0	1	0	0	0	0	1	2	1	8500/3: Infiltrating duct carcinoma, NOS	Dead (attributable to this cancer dx)	Alive or dead due to cancer
55490481	2	3	1	T4	T4	3	N1	0	3	3	1	0	0	1	0	0	0	1	1	1	8140/3: Adenocarcinoma, NOS	Dead (attributable to this cancer dx)	Alive or dead due to cancer
55490502	2	1	2	T3	T3	3	N1	0	2	2	1	0	1	0	0	0	0	1	13	0	8140/3: Adenocarcinoma, NOS	Alive or dead of other cause	Alive or dead due to cancer
55502426	1	1	1	T2	T2	2	N0	0	1	1	1	0	1	0	0	1	0	1	3	1	8480/3: Mucinous adenocarcinoma	Dead (attributable to this cancer dx)	Alive or dead due to cancer
55509247	2	1	2	T4	T4	3	N1	0	unknown	unknown	3	0	1	0	0	1	0	1	7	1	8255/3: Adenocarcinoma with mixed subtypes	Dead (attributable to this cancer dx)	Alive or dead due to cancer
55931244	1	1	1	T2	T2	2	N0	0	unknown	unknown	2	0	1	0	0	1	0	1	2	1	8140/3: Adenocarcinoma, NOS	Dead (attributable to this cancer dx)	Alive or dead due to cancer
58883994	2	1	1	T3	T3	3	N1	0	3	3	1	0	0	0	0	1	1	1	1	1	8000/3: Neoplasm, malignant	Dead (attributable to this cancer dx)	Alive or dead due to cancer
59230368	1	1	1	T4	T4	2	N0	0	unknown	unknown	2	0	1	0	0	1	0	1	23	1	8140/3: Adenocarcinoma, NOS	Dead (missing/unknown COD)	Dead (missing/unknown COD)
59357315	1	1	2	T2	T2	2	N0	0	unknown	unknown	2	0	1	0	0	0	0	1	9	1	8140/3: Adenocarcinoma, NOS	Dead (attributable to this cancer dx)	Alive or dead due to cancer
59673435	2	1	1	T3	T3	3	N0	0	unknown	unknown	1	0	1	0	0	1	0	1	6	1	8140/3: Adenocarcinoma, NOS	Dead (attributable to this cancer dx)	Alive or dead due to cancer
60766413	2	1	2	T2	T3	3	N1	0	unknown	unknown	2	0	0	0	0	1	0	0	10	1	8140/3: Adenocarcinoma, NOS	N/A not first tumor	N/A not first tumor
62147973	2	1	2	T3	T2	2	N0	0	unknown	unknown	1	0	1	0	0	1	0	1	4	1	8140/3: Adenocarcinoma, NOS	Dead (attributable to this cancer dx)	Alive or dead due to cancer
62639367	1	1	2	T2	T2	2	N0	0	unknown	unknown	2	0	0	0	0	1	0	1	58	1	8246/3: Neuroendocrine carcinoma, NOS	Dead (attributable to this cancer dx)	Alive or dead due to cancer
62702927	1	1	2	T1	T1	1	N0	0	unknown	unknown	2	0	1	0	0	0	0	1	13	1	8140/3: Adenocarcinoma, NOS	Dead (attributable to this cancer dx)	Alive or dead due to cancer
62716975	1	1	2	T2	T2	2	N0	0	unknown	unknown	2	1	1	1	0	0	0	1	30	1	8140/3: Adenocarcinoma, NOS	Dead (attributable to this cancer dx)	Alive or dead due to cancer
62729338	2	2	2	T2	T3	3	N0	0	unknown	unknown	2	0	0	0	0	1	0	0	2	1	8000/3: Neoplasm, malignant	N/A not first tumor	N/A not first tumor
62761442	2	1	1	T3	T2	2	N0	1	4	3	1	0	0	0	0	1	0	0	19	0	8246/3: Neuroendocrine carcinoma, NOS	N/A not first tumor	N/A not first tumor
62778723	2	1	2	T1	T1	1	N0	0	2	2	3	0	1	0	0	1	0	1	1	1	8140/3: Adenocarcinoma, NOS	Dead (attributable to this cancer dx)	Alive or dead due to cancer
63299062	1	1	1	T3	T3	3	N0	0	unknown	unknown	2	0	1	0	0	1	0	1	3	1	8140/3: Adenocarcinoma, NOS	Dead (attributable to this cancer dx)	Alive or dead due to cancer
63344223	2	1	2	T4	T4	3	N1	0	unknown	unknown	3	0	0	0	0	1	1	1	1	0	8140/3: Adenocarcinoma, NOS	Alive or dead of other cause	Alive or dead due to cancer
69501292	1	1	2	T3	T3	3	N1	0	3	3	1	1	1	0	0	1	1	0	10	1	8041/3: Small cell carcinoma, NOS	N/A not first tumor	N/A not first tumor
70523745	2	1	2	T2	T3	3	N0	0	unknown	unknown	1	0	0	0	0	1	0	0	1	1	8140/3: Adenocarcinoma, NOS	N/A not first tumor	N/A not first tumor
71033791	2	1	1	T3	T2	2	N1	1	1	1	1	1	1	0	0	1	0	0	31	1	8500/3: Infiltrating duct carcinoma, NOS	N/A not first tumor	N/A not first tumor
71627469	2	1	1	T2	T2	2	N0	0	unknown	unknown	2	0	1	1	0	1	0	0	3	1	8140/3: Adenocarcinoma, NOS	N/A not first tumor	N/A not first tumor
72149046	2	2	2	T3	T3	3	N0	0	unknown	unknown	1	0	1	0	0	0	0	0	8	1	8140/3: Adenocarcinoma, NOS	N/A not first tumor	N/A not first tumor
72154851	1	1	2	T4	T4	3	N1	0	unknown	unknown	2	0	1	0	0	1	0	1	1	1	8140/3: Adenocarcinoma, NOS	Dead (attributable to this cancer dx)	Alive or dead due to cancer
72157384	1	1	1	T2	T3	3	N0	0	unknown	unknown	2	0	1	0	0	0	0	1	25	1	8140/3: Adenocarcinoma, NOS	Dead (attributable to this cancer dx)	Alive or dead due to cancer
72158389	2	1	2	T2	T2	2	N0	0	unknown	unknown	2	0	0	0	0	1	0	1	1	1	8246/3: Neuroendocrine carcinoma, NOS	Dead (attributable to this cancer dx)	Alive or dead due to cancer
72170276	1	1	1	T3	T2	2	N0	0	3	3	3	0	1	0	0	1	0	1	4	1	8140/3: Adenocarcinoma, NOS	Dead (attributable to this cancer dx)	Alive or dead due to cancer
72180689	1	1	1	T3	T3	3	N1	1	3	3	1	0	1	0	0	0	0	1	6	1	8140/3: Adenocarcinoma, NOS	Dead (attributable to this cancer dx)	Alive or dead due to cancer
72191746	1	1	1	T3	T3	3	N1	0	2	2	2	0	1	0	0	0	0	1	4	1	8140/3: Adenocarcinoma, NOS	Dead (attributable to this cancer dx)	Alive or dead due to cancer
72193876	1	1	2	T3	T3	3	N1	0	3	3	1	1	0	0	0	1	0	1	8	1	8140/3: Adenocarcinoma, NOS	Dead (attributable to this cancer dx)	Alive or dead due to cancer
72204782	1	1	1	T2	T3	3	N1	1	unknown	unknown	1	0	0	0	0	0	0	1	5	1	8140/3: Adenocarcinoma, NOS	Dead (attributable to this cancer dx)	Alive or dead due to cancer
72215057	1	2	1	T2	T3	3	N0	0	unknown	unknown	3	0	1	0	0	1	0	1	3	0	8140/3: Adenocarcinoma, NOS	Alive or dead of other cause	Alive or dead due to cancer
72216231	2	1	2	T4	T4	3	N0	0	unknown	unknown	3	0	0	0	0	1	0	1	1	1	8140/3: Adenocarcinoma, NOS	Dead (attributable to this cancer dx)	Alive or dead due to cancer
72624572	1	1	1	T4	T4	3	N0	0	unknown	unknown	3	1	1	0	0	0	0	1	3	1	8500/3: Infiltrating duct carcinoma, NOS	Dead (attributable to this cancer dx)	Alive or dead due to cancer
72629874	2	1	2	T4	T4	3	N1	0	unknown	unknown	3	0	0	0	0	1	0	1	1	1	8140/3: Adenocarcinoma, NOS	Dead (attributable to this cancer dx)	Alive or dead due to cancer
72641289	1	1	2	T4	T4	2	N1	0	3	3	3	0	1	0	0	0	0	0	46	1	8140/3: Adenocarcinoma, NOS	N/A not first tumor	N/A not first tumor
72642490	1	1	2	T3	T3	3	N1	0	3	3	3	1	1	1	0	1	0	1	15	0	8041/3: Small cell carcinoma, NOS	Alive or dead of other cause	Alive or dead due to cancer
72642497	1	1	1	T4	T4	2	N1	0	3	3	3	0	0	0	0	0	0	1	5	1	8140/3: Adenocarcinoma, NOS	Dead (attributable to this cancer dx)	Alive or dead due to cancer
72649345	2	1	2	T4	T4	3	N1	0	2	2	2	0	1	0	0	1	0	1	12	1	8140/3: Adenocarcinoma, NOS	Dead (attributable to this cancer dx)	Alive or dead due to cancer
72662363	2	1	2	T3	T3	3	N0	0	unknown	unknown	1	0	1	0	0	1	0	1	2	1	8140/3: Adenocarcinoma, NOS	Dead (attributable to this cancer dx)	Alive or dead due to cancer
72664918	1	1	2	T2	T3	3	N0	0	2	2	3	0	0	0	0	1	0	1	2	0	8140/3: Adenocarcinoma, NOS	Alive or dead of other cause	Alive or dead due to cancer
72674658	1	1	1	T4	T4	2	N0	0	unknown	unknown	2	0	1	0	0	1	0	1	8	1	8140/3: Adenocarcinoma, NOS	Dead (missing/unknown COD)	Dead (missing/unknown COD)
72681222	2	1	2	T4	T4	2	N0	0	unknown	unknown	1	0	0	0	0	0	0	1	1	1	8140/3: Adenocarcinoma, NOS	Dead (attributable to this cancer dx)	Alive or dead due to cancer
72686321	2	1	1	T2	T3	3	N1	0	unknown	unknown	2	0	1	0	0	1	0	1	4	1	8140/3: Adenocarcinoma, NOS	Dead (missing/unknown COD)	Dead (missing/unknown COD)
72686379	1	2	2	T1	T1	1	N1	1	2	2	1	0	0	0	0	0	0	1	8	1	8140/3: Adenocarcinoma, NOS	Dead (attributable to this cancer dx)	Alive or dead due to cancer
72686750	1	2	1	T3	T3	3	N1	0	unknown	unknown	1	0	0	0	0	1	0	1	3	1	8140/3: Adenocarcinoma, NOS	Dead (attributable to this cancer dx)	Alive or dead due to cancer
72690576	2	1	2	T3	T3	3	N1	0	unknown	unknown	1	0	0	0	0	0	1	1	10	1	8140/3: Adenocarcinoma, NOS	Dead (attributable to this cancer dx)	Alive or dead due to cancer
72698290	2	1	2	T2	T2	2	N1	1	unknown	unknown	1	1	1	0	0	1	0	1	34	1	8140/3: Adenocarcinoma, NOS	Dead (attributable to this cancer dx)	Alive or dead due to cancer
72701984	2	1	1	T4	T4	3	N1	0	unknown	unknown	2	0	1	0	0	1	0	0	5	1	8140/3: Adenocarcinoma, NOS	N/A not first tumor	N/A not first tumor
72708473	2	1	1	T2	T2	2	N0	0	3	3	1	0	0	0	0	1	0	0	4	0	8140/3: Adenocarcinoma, NOS	N/A not first tumor	N/A not first tumor
72721483	2	1	1	T2	T2	2	N0	0	unknown	unknown	2	0	0	0	0	1	0	1	4	1	8140/3: Adenocarcinoma, NOS	Dead (attributable to this cancer dx)	Alive or dead due to cancer
72736732	1	1	1	T2	T3	3	N1	0	unknown	unknown	2	0	1	0	0	1	1	1	14	1	8140/3: Adenocarcinoma, NOS	Dead (attributable to this cancer dx)	Alive or dead due to cancer
72743778	1	3	2	T4	T4	2	N0	0	3	3	2	0	1	0	0	1	0	1	7	1	8246/3: Neuroendocrine carcinoma, NOS	Dead (attributable to this cancer dx)	Alive or dead due to cancer
72744412	2	2	1	T4	T4	2	N1	0	unknown	unknown	1	0	0	0	0	1	0	1	6	1	8010/3: Carcinoma, NOS	Alive or dead of other cause	Dead (attributable to causes other than this cancer dx)
72746861	2	1	2	T4	T4	2	N1	0	unknown	unknown	1	0	1	0	0	0	0	1	3	1	8140/3: Adenocarcinoma, NOS	Alive or dead of other cause	Dead (attributable to causes other than this cancer dx)
72752252	2	1	2	T2	T2	2	N0	0	unknown	unknown	1	0	0	0	0	1	0	1	2	1	8140/3: Adenocarcinoma, NOS	Dead (attributable to this cancer dx)	Alive or dead due to cancer
72756712	1	1	2	T1	T1	1	N0	0	unknown	unknown	1	0	1	0	0	0	1	1	4	1	8140/3: Adenocarcinoma, NOS	Dead (attributable to this cancer dx)	Alive or dead due to cancer
72762871	2	1	2	T3	T2	2	N0	0	unknown	unknown	1	0	1	0	0	1	0	1	4	1	8140/3: Adenocarcinoma, NOS	Dead (attributable to this cancer dx)	Alive or dead due to cancer
72768228	2	1	1	T2	T2	2	N1	0	unknown	unknown	1	0	1	0	0	1	0	1	1	1	8246/3: Neuroendocrine carcinoma, NOS	Dead (attributable to this cancer dx)	Alive or dead due to cancer
72774000	1	1	2	T2	T2	2	N1	0	unknown	unknown	2	0	1	0	0	1	0	1	1	1	8140/3: Adenocarcinoma, NOS	Alive or dead of other cause	Dead (attributable to causes other than this cancer dx)
72781146	1	1	1	T1	T1	1	N1	0	3	3	3	0	1	0	0	1	1	1	8	1	8140/3: Adenocarcinoma, NOS	Dead (attributable to this cancer dx)	Alive or dead due to cancer
73176749	2	1	2	T1	T1	1	N0	0	3	3	1	0	0	0	0	1	0	1	2	1	8140/3: Adenocarcinoma, NOS	Dead (attributable to this cancer dx)	Alive or dead due to cancer
73190070	2	1	2	T3	T3	3	N1	0	unknown	unknown	3	0	0	0	0	1	0	1	1	1	8140/3: Adenocarcinoma, NOS	Dead (missing/unknown COD)	Dead (missing/unknown COD)
73199800	1	1	1	T3	T2	2	N0	0	2	2	1	0	0	0	0	1	0	1	3	1	8140/3: Adenocarcinoma, NOS	Dead (attributable to this cancer dx)	Alive or dead due to cancer
73208574	2	1	1	T4	T4	2	N0	0	unknown	unknown	2	0	1	1	0	1	0	1	20	1	8480/3: Mucinous adenocarcinoma	Dead (attributable to this cancer dx)	Alive or dead due to cancer
73208595	1	1	1	T3	T2	2	N0	1	1	1	3	0	0	0	0	1	0	1	1	0	8246/3: Neuroendocrine carcinoma, NOS	Alive or dead of other cause	Alive or dead due to cancer
73209591	2	1	1	T4	T4	2	N0	0	unknown	unknown	2	0	0	0	0	0	0	1	1	1	8500/3: Infiltrating duct carcinoma, NOS	Dead (attributable to this cancer dx)	Alive or dead due to cancer
73216713	1	2	2	T2	T2	2	N0	0	unknown	unknown	2	0	1	0	0	1	0	1	3	1	8140/3: Adenocarcinoma, NOS	Dead (missing/unknown COD)	Dead (missing/unknown COD)
73216742	2	1	2	T2	T2	2	N1	0	2	2	1	0	1	0	0	1	0	0	27	1	8140/3: Adenocarcinoma, NOS	N/A not first tumor	N/A not first tumor
73221277	2	3	2	T3	T2	2	N1	0	unknown	unknown	1	0	1	0	0	0	0	1	9	1	8140/3: Adenocarcinoma, NOS	Dead (attributable to this cancer dx)	Alive or dead due to cancer
73226232	1	1	2	T2	T2	2	N0	1	1	1	2	0	0	0	0	0	0	1	5	1	8500/3: Infiltrating duct carcinoma, NOS	Dead (attributable to this cancer dx)	Alive or dead due to cancer
73227391	2	1	1	T2	T3	3	N0	0	unknown	unknown	1	0	1	0	0	1	0	1	7	1	8140/3: Adenocarcinoma, NOS	Dead (missing/unknown COD)	Dead (missing/unknown COD)
73232044	2	1	2	T2	T3	3	N0	0	unknown	unknown	1	0	1	0	0	1	0	1	55	0	8246/3: Neuroendocrine carcinoma, NOS	Alive or dead of other cause	Alive or dead due to cancer
73232784	2	1	2	T2	T2	2	N0	0	2	2	2	0	0	0	0	1	0	1	2	1	8140/3: Adenocarcinoma, NOS	Dead (attributable to this cancer dx)	Alive or dead due to cancer
73235162	1	3	1	T2	T2	2	N1	0	unknown	unknown	2	0	1	0	0	1	0	1	4	1	8140/3: Adenocarcinoma, NOS	Dead (attributable to this cancer dx)	Alive or dead due to cancer
73238792	2	1	1	T3	T3	3	N0	0	unknown	unknown	1	0	0	0	0	1	0	1	4	1	8140/3: Adenocarcinoma, NOS	Dead (attributable to this cancer dx)	Alive or dead due to cancer
73249993	1	1	2	T3	T3	3	N0	1	2	2	2	0	0	0	0	0	0	1	37	0	8140/3: Adenocarcinoma, NOS	Alive or dead of other cause	Alive or dead due to cancer
73254314	1	1	2	T2	T3	3	N0	0	unknown	unknown	2	0	1	0	0	0	0	1	4	1	8140/3: Adenocarcinoma, NOS	Dead (attributable to this cancer dx)	Alive or dead due to cancer
73274771	2	1	1	T2	T2	2	N0	0	3	3	1	0	1	0	0	1	0	1	4	1	8140/3: Adenocarcinoma, NOS	Dead (attributable to this cancer dx)	Alive or dead due to cancer
73279645	2	1	2	T3	T2	2	N1	0	unknown	unknown	2	0	1	0	0	1	0	1	17	1	8140/3: Adenocarcinoma, NOS	Dead (attributable to this cancer dx)	Alive or dead due to cancer
73283182	2	1	1	T3	T2	2	N0	0	unknown	unknown	1	0	0	0	0	0	0	1	3	1	8140/3: Adenocarcinoma, NOS	Dead (attributable to this cancer dx)	Alive or dead due to cancer
73294439	2	1	2	T3	T2	2	N0	1	3	3	1	0	1	0	0	1	0	1	4	1	8500/3: Infiltrating duct carcinoma, NOS	Dead (attributable to this cancer dx)	Alive or dead due to cancer
73300136	2	1	2	T2	T2	2	N0	0	unknown	unknown	1	0	0	0	0	1	0	1	2	1	8140/3: Adenocarcinoma, NOS	Dead (attributable to this cancer dx)	Alive or dead due to cancer
73326319	1	1	2	T3	T2	2	N1	1	2	2	2	0	0	0	0	1	0	1	27	0	8249/3: Atypical carcinoid tumor	Alive or dead of other cause	Alive or dead due to cancer
73330970	2	1	1	T3	T3	3	N1	0	4	3	1	1	1	1	1	1	1	1	1	1	8246/3: Neuroendocrine carcinoma, NOS	Dead (attributable to this cancer dx)	Alive or dead due to cancer
73711826	2	1	2	T4	T4	3	N0	0	unknown	unknown	2	0	1	0	0	1	0	1	4	1	8140/3: Adenocarcinoma, NOS	Dead (attributable to this cancer dx)	Alive or dead due to cancer
73723308	1	1	1	T4	T4	3	N0	0	2	2	2	0	1	0	0	0	1	1	4	1	8500/3: Infiltrating duct carcinoma, NOS	Dead (attributable to this cancer dx)	Alive or dead due to cancer
73731949	2	1	1	T2	T3	3	N0	0	unknown	unknown	3	0	0	0	0	1	0	1	2	1	8140/3: Adenocarcinoma, NOS	Dead (attributable to this cancer dx)	Alive or dead due to cancer
73747719	1	1	1	T3	T3	3	N1	0	unknown	unknown	1	0	1	0	0	1	0	1	12	1	8140/3: Adenocarcinoma, NOS	Dead (attributable to this cancer dx)	Alive or dead due to cancer
73755605	1	1	2	T3	T2	2	N1	0	4	3	2	1	1	0	0	1	0	1	15	1	8140/3: Adenocarcinoma, NOS	Dead (attributable to this cancer dx)	Alive or dead due to cancer
73765574	1	1	2	T3	T3	3	N1	0	unknown	unknown	2	0	0	0	0	1	0	1	1	1	8140/3: Adenocarcinoma, NOS	Dead (attributable to this cancer dx)	Alive or dead due to cancer
73778813	1	1	2	T2	T2	2	N0	0	unknown	unknown	2	0	0	0	0	1	0	1	5	1	8140/3: Adenocarcinoma, NOS	Dead (attributable to this cancer dx)	Alive or dead due to cancer
73780188	2	1	2	T3	T2	2	N1	1	2	2	1	0	0	0	0	0	0	1	5	1	8140/3: Adenocarcinoma, NOS	Dead (attributable to this cancer dx)	Alive or dead due to cancer
73783170	2	1	2	T3	T3	3	N0	0	unknown	unknown	1	0	1	0	0	1	0	0	1	1	8140/3: Adenocarcinoma, NOS	N/A not first tumor	N/A not first tumor
73786233	2	1	2	T3	T3	3	N1	1	3	3	1	0	1	0	0	1	1	1	7	1	8500/3: Infiltrating duct carcinoma, NOS	Dead (missing/unknown COD)	Dead (missing/unknown COD)
73786476	2	1	1	T3	T2	2	N1	1	1	1	2	1	1	0	0	0	0	1	4	1	8240/3: Carcinoid tumor, NOS	Dead (attributable to this cancer dx)	Alive or dead due to cancer
73788063	2	1	1	T3	T2	2	N0	0	2	2	2	0	1	0	0	0	0	1	18	0	8140/3: Adenocarcinoma, NOS	Alive or dead of other cause	Alive or dead due to cancer
73791392	2	1	2	T3	T3	3	N1	0	2	2	2	0	1	0	0	0	0	1	3	0	8140/3: Adenocarcinoma, NOS	Alive or dead of other cause	Alive or dead due to cancer
73797410	1	1	2	T2	T2	2	N0	0	unknown	unknown	3	0	1	0	0	1	0	1	18	1	8140/3: Adenocarcinoma, NOS	Dead (attributable to this cancer dx)	Alive or dead due to cancer
73798634	2	1	2	T4	T4	3	N0	0	unknown	unknown	3	0	0	0	0	0	0	1	1	1	8140/3: Adenocarcinoma, NOS	Dead (attributable to this cancer dx)	Alive or dead due to cancer
73799362	1	1	1	T4	T4	3	N1	0	3	3	2	0	1	0	0	1	0	1	1	1	8010/3: Carcinoma, NOS	Dead (attributable to this cancer dx)	Alive or dead due to cancer
73811064	1	1	2	T2	T2	2	N0	0	unknown	unknown	1	0	1	0	0	1	0	0	19	0	8140/3: Adenocarcinoma, NOS	N/A not first tumor	N/A not first tumor
73827118	2	1	2	T3	T3	3	N1	0	unknown	unknown	2	0	0	0	0	0	0	1	7	1	8500/3: Infiltrating duct carcinoma, NOS	Dead (attributable to this cancer dx)	Alive or dead due to cancer
73832511	1	1	1	T2	T3	3	N1	0	unknown	unknown	2	0	1	0	0	1	0	1	2	1	8140/3: Adenocarcinoma, NOS	Dead (attributable to this cancer dx)	Alive or dead due to cancer
73836180	2	1	2	T4	T4	2	N0	0	unknown	unknown	2	0	0	0	0	1	0	1	1	1	8140/3: Adenocarcinoma, NOS	Dead (attributable to this cancer dx)	Alive or dead due to cancer
74255820	1	1	1	T3	T2	2	N0	0	unknown	unknown	2	0	1	0	0	1	0	1	1	1	8140/3: Adenocarcinoma, NOS	Dead (attributable to this cancer dx)	Alive or dead due to cancer
74280560	1	1	2	T4	T4	3	N1	0	3	3	2	0	1	0	0	1	0	1	9	1	8500/3: Infiltrating duct carcinoma, NOS	Dead (attributable to this cancer dx)	Alive or dead due to cancer
74301146	2	1	2	T2	T3	3	N0	0	unknown	unknown	2	0	1	0	0	0	1	1	14	1	8140/3: Adenocarcinoma, NOS	Dead (attributable to this cancer dx)	Alive or dead due to cancer
76543053	1	1	2	T2	T3	3	N0	0	unknown	unknown	2	0	1	0	0	1	0	1	77	0	8140/3: Adenocarcinoma, NOS	Alive or dead of other cause	Alive or dead due to cancer
76545300	2	1	2	T3	T2	2	N0	0	2	2	1	0	1	0	0	1	0	1	3	1	8140/3: Adenocarcinoma, NOS	Dead (attributable to this cancer dx)	Alive or dead due to cancer
76547936	1	1	2	T3	T2	2	N0	0	unknown	unknown	1	0	1	0	0	1	0	0	41	1	8246/3: Neuroendocrine carcinoma, NOS	N/A not first tumor	N/A not first tumor
76571196	2	1	2	T1	T1	1	N0	0	3	3	1	0	0	0	0	0	0	1	3	1	8140/3: Adenocarcinoma, NOS	Dead (attributable to this cancer dx)	Alive or dead due to cancer
76594297	1	1	1	T3	T3	3	N1	0	unknown	unknown	2	0	1	0	0	1	0	1	3	1	8140/3: Adenocarcinoma, NOS	Dead (attributable to this cancer dx)	Alive or dead due to cancer
76610207	2	1	1	T4	T4	3	N1	0	unknown	unknown	3	0	0	0	0	1	0	1	5	1	8140/3: Adenocarcinoma, NOS	Dead (attributable to this cancer dx)	Alive or dead due to cancer
76612460	1	1	1	T4	T4	3	N0	0	unknown	unknown	2	0	0	0	0	1	0	1	19	1	8246/3: Neuroendocrine carcinoma, NOS	Dead (attributable to this cancer dx)	Alive or dead due to cancer
76637360	2	1	2	T1	T1	1	N0	0	unknown	unknown	1	0	1	0	0	1	0	1	8	1	8140/3: Adenocarcinoma, NOS	Dead (attributable to this cancer dx)	Alive or dead due to cancer
76637563	2	1	2	T3	T3	3	N0	0	unknown	unknown	1	0	1	0	0	1	0	0	9	1	8246/3: Neuroendocrine carcinoma, NOS	N/A not first tumor	N/A not first tumor
76638269	2	1	1	T2	T3	3	N1	0	unknown	unknown	1	0	1	0	0	0	1	1	12	1	8140/3: Adenocarcinoma, NOS	Dead (attributable to this cancer dx)	Alive or dead due to cancer
77087778	2	1	2	T2	T2	2	N0	0	unknown	unknown	3	0	0	0	0	1	0	1	2	1	8140/3: Adenocarcinoma, NOS	Dead (attributable to this cancer dx)	Alive or dead due to cancer
77087786	1	2	2	T2	T3	3	N0	0	unknown	unknown	2	0	1	0	0	1	0	1	7	1	8481/3: Mucin-producing adenocarcinoma	Dead (attributable to this cancer dx)	Alive or dead due to cancer
77106786	1	1	2	T2	T3	3	N0	0	unknown	unknown	2	0	1	0	0	1	0	1	28	1	8246/3: Neuroendocrine carcinoma, NOS	Dead (attributable to this cancer dx)	Alive or dead due to cancer
77108012	2	1	1	T2	T3	3	N0	0	unknown	unknown	1	0	1	0	0	1	0	1	2	1	8140/3: Adenocarcinoma, NOS	Dead (attributable to this cancer dx)	Alive or dead due to cancer
77112571	1	1	1	T3	T2	2	N1	1	2	2	1	0	1	0	0	0	0	1	24	1	8480/3: Mucinous adenocarcinoma	Dead (attributable to this cancer dx)	Alive or dead due to cancer
77153025	1	1	1	T2	T3	3	N0	0	unknown	unknown	1	0	0	0	0	1	0	1	1	1	8010/3: Carcinoma, NOS	Dead (attributable to this cancer dx)	Alive or dead due to cancer
77218069	1	1	1	T2	T3	3	N1	0	unknown	unknown	2	0	0	0	0	1	0	1	1	1	8010/3: Carcinoma, NOS	Dead (attributable to this cancer dx)	Alive or dead due to cancer
77640402	2	1	2	T3	T2	2	N1	1	3	3	3	0	0	0	0	1	0	0	5	1	8140/3: Adenocarcinoma, NOS	N/A not first tumor	N/A not first tumor
77650683	2	1	1	T3	T3	3	N1	0	unknown	unknown	1	0	1	0	0	1	0	1	4	1	8140/3: Adenocarcinoma, NOS	Dead (attributable to this cancer dx)	Alive or dead due to cancer
77700859	1	1	1	T2	T2	2	N0	0	3	3	3	0	1	0	0	0	0	1	13	1	8140/3: Adenocarcinoma, NOS	Dead (attributable to this cancer dx)	Alive or dead due to cancer
77712335	1	1	1	T3	T3	3	N1	0	unknown	unknown	2	0	0	0	0	1	0	1	3	1	8140/3: Adenocarcinoma, NOS	Dead (attributable to this cancer dx)	Alive or dead due to cancer
77720743	1	1	1	T2	T3	3	N0	0	unknown	unknown	1	0	0	0	1	0	0	1	9	1	8240/3: Carcinoid tumor, NOS	Dead (attributable to this cancer dx)	Alive or dead due to cancer
4016093	1	3	1	T3	T2	2	N0	0	3	3	1	0	1	0	0	0	0	1	18	1	8140/3: Adenocarcinoma, NOS	Dead (attributable to this cancer dx)	Alive or dead due to cancer
9472729	2	3	1	T3	T3	3	N1	0	unknown	unknown	2	0	1	0	0	1	0	1	8	1	8140/3: Adenocarcinoma, NOS	Dead (attributable to this cancer dx)	Alive or dead due to cancer
9476868	1	3	1	T4	T4	3	N0	0	unknown	unknown	2	0	1	1	0	0	1	1	8	1	8140/3: Adenocarcinoma, NOS	Dead (attributable to this cancer dx)	Alive or dead due to cancer
9567393	2	3	2	T2	T3	3	N0	0	unknown	unknown	2	0	0	0	0	1	0	1	1	1	8010/3: Carcinoma, NOS	Dead (attributable to this cancer dx)	Alive or dead due to cancer
16519595	1	3	2	T4	T4	3	N1	0	2	2	3	0	0	0	0	0	0	1	1	1	8140/3: Adenocarcinoma, NOS	Dead (attributable to this cancer dx)	Alive or dead due to cancer
22464521	1	3	1	T3	T2	2	N0	0	unknown	unknown	1	0	1	0	0	1	0	1	5	1	8140/3: Adenocarcinoma, NOS	Dead (attributable to this cancer dx)	Alive or dead due to cancer
22468360	2	3	1	T3	T3	3	N0	0	unknown	unknown	3	1	1	0	0	0	0	1	6	1	8140/3: Adenocarcinoma, NOS	Dead (attributable to this cancer dx)	Alive or dead due to cancer
22494566	2	3	1	T3	T3	3	N0	0	unknown	unknown	3	0	0	0	0	1	0	1	2	1	8140/3: Adenocarcinoma, NOS	Dead (attributable to this cancer dx)	Alive or dead due to cancer
22494954	2	3	2	T3	T2	2	N0	0	2	2	1	0	0	0	0	1	1	1	1	1	8140/3: Adenocarcinoma, NOS	Dead (attributable to this cancer dx)	Alive or dead due to cancer
22504594	2	3	1	T2	T3	3	N0	0	unknown	unknown	3	0	1	0	0	1	0	0	1	1	8140/3: Adenocarcinoma, NOS	N/A not first tumor	N/A not first tumor
22506886	2	3	1	T3	T2	2	N1	0	unknown	unknown	3	0	1	0	0	0	1	1	2	1	8140/3: Adenocarcinoma, NOS	Dead (attributable to this cancer dx)	Alive or dead due to cancer
22509536	2	3	1	T2	T2	2	N0	0	unknown	unknown	1	1	1	0	0	1	0	1	6	1	8140/3: Adenocarcinoma, NOS	Dead (attributable to this cancer dx)	Alive or dead due to cancer
22527238	2	3	2	T2	T3	3	N0	0	3	3	2	0	1	0	0	1	0	1	1	1	8010/3: Carcinoma, NOS	Dead (attributable to this cancer dx)	Alive or dead due to cancer
22528973	2	3	2	T3	T2	2	N1	0	unknown	unknown	1	0	0	0	0	1	0	1	34	0	8246/3: Neuroendocrine carcinoma, NOS	Alive or dead of other cause	Alive or dead due to cancer
22537678	2	3	2	T2	T3	3	N0	0	unknown	unknown	2	0	0	0	0	1	0	1	18	0	8140/3: Adenocarcinoma, NOS	Alive or dead of other cause	Alive or dead due to cancer
22538636	2	3	1	T3	T2	2	N1	0	unknown	unknown	3	0	1	0	0	0	0	0	5	1	8140/3: Adenocarcinoma, NOS	N/A not first tumor	N/A not first tumor
26431779	1	3	1	T2	T3	3	N0	0	unknown	unknown	2	0	1	0	0	1	0	1	6	1	8140/3: Adenocarcinoma, NOS	Dead (attributable to this cancer dx)	Alive or dead due to cancer
27478692	2	3	1	T3	T3	3	N1	0	3	3	3	0	1	0	0	1	1	1	2	1	8010/3: Carcinoma, NOS	Dead (attributable to this cancer dx)	Alive or dead due to cancer
29000164	1	3	2	T2	T2	2	N1	0	2	2	1	0	1	0	0	0	0	1	20	1	8140/3: Adenocarcinoma, NOS	Dead (attributable to this cancer dx)	Alive or dead due to cancer
32414079	2	3	1	T4	T4	3	N0	0	unknown	unknown	1	0	1	0	0	1	0	1	2	1	8041/3: Small cell carcinoma, NOS	Dead (attributable to this cancer dx)	Alive or dead due to cancer
32414149	1	3	1	T2	T2	2	N1	0	3	3	2	0	1	0	0	1	0	1	2	1	8140/3: Adenocarcinoma, NOS	Dead (attributable to this cancer dx)	Alive or dead due to cancer
32414531	1	3	2	T3	T2	2	N0	0	unknown	unknown	1	0	0	0	0	1	0	1	7	1	8140/3: Adenocarcinoma, NOS	Dead (attributable to this cancer dx)	Alive or dead due to cancer
32414797	1	3	1	T4	T4	3	N1	0	3	3	2	0	1	0	0	1	1	1	27	1	8140/3: Adenocarcinoma, NOS	Dead (attributable to this cancer dx)	Alive or dead due to cancer
32416169	1	3	2	T3	T2	2	N0	0	unknown	unknown	1	0	1	0	0	0	0	1	18	1	8140/3: Adenocarcinoma, NOS	Dead (attributable to this cancer dx)	Alive or dead due to cancer
32417035	1	3	1	T3	T3	3	N1	0	unknown	unknown	3	0	1	0	0	1	0	1	27	0	8246/3: Neuroendocrine carcinoma, NOS	Alive or dead of other cause	Alive or dead due to cancer
32417183	2	3	1	T3	T2	2	N0	0	2	2	1	0	1	0	0	0	0	1	12	1	8500/3: Infiltrating duct carcinoma, NOS	Dead (attributable to this cancer dx)	Alive or dead due to cancer
32417957	1	3	1	T2	T2	2	N0	0	unknown	unknown	2	0	1	0	0	1	0	1	19	0	8140/3: Adenocarcinoma, NOS	Alive or dead of other cause	Alive or dead due to cancer
32418635	1	3	2	T4	T4	3	N1	0	unknown	unknown	3	1	1	0	0	0	0	1	2	1	8140/3: Adenocarcinoma, NOS	Dead (attributable to this cancer dx)	Alive or dead due to cancer
33938369	2	3	2	T3	T3	3	N0	0	unknown	unknown	3	0	1	0	0	1	1	1	1	1	8140/3: Adenocarcinoma, NOS	Dead (attributable to this cancer dx)	Alive or dead due to cancer
40438007	1	3	1	T2	T3	3	N0	0	3	3	1	0	1	0	0	0	0	1	23	1	8140/3: Adenocarcinoma, NOS	Dead (attributable to this cancer dx)	Alive or dead due to cancer
52107667	2	3	2	T2	T2	2	N0	0	3	3	3	0	0	0	0	1	0	1	3	1	8140/3: Adenocarcinoma, NOS	N/A not first tumor	N/A not first tumor
52744471	2	3	2	T2	T3	3	N0	0	unknown	unknown	3	0	1	0	0	1	0	1	2	1	8140/3: Adenocarcinoma, NOS	Dead (attributable to this cancer dx)	Alive or dead due to cancer
53222667	2	3	2	T4	T4	2	N1	0	unknown	unknown	1	1	1	1	0	1	0	1	8	1	8140/3: Adenocarcinoma, NOS	Dead (attributable to this cancer dx)	Alive or dead due to cancer
53285144	2	3	1	T2	T2	2	N0	0	2	2	1	0	1	0	0	1	0	1	7	1	8140/3: Adenocarcinoma, NOS	Dead (attributable to this cancer dx)	Alive or dead due to cancer
53775196	1	3	2	T4	T4	2	N1	0	2	2	1	0	1	0	0	0	0	1	31	1	8140/3: Adenocarcinoma, NOS	Dead (attributable to this cancer dx)	Alive or dead due to cancer
54345155	1	3	2	T4	T4	1	N1	0	unknown	unknown	3	0	1	0	0	1	0	1	10	1	8140/3: Adenocarcinoma, NOS	Dead (attributable to this cancer dx)	Alive or dead due to cancer
54360239	2	3	1	T2	T3	3	N1	0	unknown	unknown	2	0	0	0	0	1	1	1	1	1	8490/3: Signet ring cell carcinoma	Dead (attributable to this cancer dx)	Alive or dead due to cancer
54399442	2	3	2	T3	T2	2	N1	0	unknown	unknown	1	0	1	0	0	1	1	1	6	1	8140/3: Adenocarcinoma, NOS	Dead (attributable to this cancer dx)	Alive or dead due to cancer
54867626	2	3	2	T3	T3	3	N0	0	2	2	2	0	0	0	0	1	0	1	28	0	8240/3: Carcinoid tumor, NOS	Alive or dead of other cause	Alive or dead due to cancer
54893383	1	3	1	T4	T4	3	N1	0	3	3	2	0	0	0	0	0	1	1	3	1	8140/3: Adenocarcinoma, NOS	Dead (attributable to this cancer dx)	Alive or dead due to cancer
54950927	1	3	2	T4	T4	3	N0	0	unknown	unknown	3	0	1	0	0	1	1	1	14	1	8140/3: Adenocarcinoma, NOS	Dead (attributable to this cancer dx)	Alive or dead due to cancer
55360816	2	3	1	T4	T4	2	N0	0	unknown	unknown	1	0	1	0	0	1	0	1	3	1	8140/3: Adenocarcinoma, NOS	Dead (attributable to this cancer dx)	Alive or dead due to cancer
55372321	2	3	1	T3	T3	3	N1	0	3	3	1	0	1	0	0	1	0	1	18	0	8490/3: Signet ring cell carcinoma	Alive or dead of other cause	Alive or dead due to cancer
55394238	2	3	1	T2	T3	3	N0	0	unknown	unknown	2	0	0	0	0	0	0	1	2	1	8140/3: Adenocarcinoma, NOS	Dead (attributable to this cancer dx)	Alive or dead due to cancer
55430748	1	3	2	T2	T3	3	N1	0	unknown	unknown	2	0	1	0	0	1	0	1	19	0	8246/3: Neuroendocrine carcinoma, NOS	Alive or dead of other cause	Alive or dead due to cancer
55449748	2	3	1	T1	T1	1	N1	0	unknown	unknown	2	0	0	0	0	1	0	1	4	1	8140/3: Adenocarcinoma, NOS	Dead (attributable to this cancer dx)	Alive or dead due to cancer
62665048	2	3	1	T2	T2	2	N0	0	2	2	1	0	0	0	0	1	0	1	1	1	8140/3: Adenocarcinoma, NOS	Dead (attributable to this cancer dx)	Alive or dead due to cancer
72193467	2	3	1	T3	T2	2	N0	0	unknown	unknown	1	0	0	0	0	1	0	1	3	1	8140/3: Adenocarcinoma, NOS	Dead (attributable to this cancer dx)	Alive or dead due to cancer
1794943	2	3	2	T3	T3	3	N1	0	unknown	unknown	1	0	1	0	0	1	0	0	6	1	8140/3: Adenocarcinoma, NOS	N/A not first tumor	N/A not first tumor
1813945	2	3	2	T2	T2	2	N1	0	unknown	unknown	1	0	0	0	0	1	0	0	1	1	8140/3: Adenocarcinoma, NOS	N/A not first tumor	N/A not first tumor
2419758	1	3	1	T1	T1	1	N1	0	4	3	3	0	1	0	0	0	0	0	7	1	8140/3: Adenocarcinoma, NOS	N/A not first tumor	N/A not first tumor
2857845	2	3	2	T2	T3	3	N0	0	unknown	unknown	1	0	0	1	0	1	0	1	1	1	8140/3: Adenocarcinoma, NOS	N/A not first tumor	N/A not first tumor
2869695	2	3	1	T4	T4	3	N1	0	3	3	2	0	1	0	0	1	0	0	4	1	8140/3: Adenocarcinoma, NOS	N/A not first tumor	N/A not first tumor
2872289	2	3	1	T3	T3	3	N1	0	unknown	unknown	3	0	1	0	0	1	0	0	2	1	8046/3: Non-small cell carcinoma	N/A not first tumor	N/A not first tumor
2932300	2	3	1	T3	T3	3	N1	0	2	2	2	0	0	0	0	0	0	0	3	1	8490/3: Signet ring cell carcinoma	N/A not first tumor	N/A not first tumor
3400078	2	3	1	T3	T2	2	N1	0	unknown	unknown	2	0	1	0	0	1	0	0	4	1	8310/3: Clear cell adenocarcinoma, NOS	N/A not first tumor	N/A not first tumor
3470597	2	3	2	T1	T1	1	N0	0	unknown	unknown	1	0	1	0	0	0	1	0	3	1	8140/3: Adenocarcinoma, NOS	N/A not first tumor	N/A not first tumor
3524097	2	3	1	T2	T2	2	N0	0	2	2	1	0	1	0	0	0	0	0	3	1	8140/3: Adenocarcinoma, NOS	N/A not first tumor	N/A not first tumor
3987451	1	3	1	T3	T2	2	N1	0	unknown	unknown	1	0	0	0	0	1	0	1	3	1	8140/3: Adenocarcinoma, NOS	Dead (missing/unknown COD)	Dead (missing/unknown COD)
3988126	2	3	2	T3	T3	3	N0	0	unknown	unknown	1	1	0	0	0	0	0	0	12	1	8140/3: Adenocarcinoma, NOS	N/A not first tumor	N/A not first tumor
3990532	2	3	2	T4	T4	2	N0	0	unknown	unknown	1	0	0	0	0	1	0	1	3	1	8500/3: Infiltrating duct carcinoma, NOS	Dead (attributable to this cancer dx)	Alive or dead due to cancer
3990576	2	3	1	T2	T3	3	N1	0	unknown	unknown	1	0	1	0	0	1	0	1	1	1	8140/3: Adenocarcinoma, NOS	Dead (attributable to this cancer dx)	Alive or dead due to cancer
3990699	2	3	1	T2	T3	3	N1	0	unknown	unknown	3	0	1	0	0	1	0	1	77	0	8246/3: Neuroendocrine carcinoma, NOS	Alive or dead of other cause	Alive or dead due to cancer
3992087	2	3	2	T3	T2	2	N0	0	unknown	unknown	1	0	1	0	0	0	0	1	8	1	8140/3: Adenocarcinoma, NOS	Dead (attributable to this cancer dx)	Alive or dead due to cancer
4012795	2	3	2	T4	T4	2	N1	0	unknown	unknown	2	0	0	0	0	1	0	1	24	1	8480/3: Mucinous adenocarcinoma	Dead (attributable to this cancer dx)	Alive or dead due to cancer
4017665	2	3	2	T3	T2	2	N0	0	unknown	unknown	3	0	0	0	0	1	1	1	4	1	8140/3: Adenocarcinoma, NOS	Dead (attributable to this cancer dx)	Alive or dead due to cancer
4019572	1	3	2	T4	T4	3	N1	0	2	2	3	0	1	0	0	1	0	1	13	1	8140/3: Adenocarcinoma, NOS	Dead (attributable to this cancer dx)	Alive or dead due to cancer
4020691	1	3	2	T2	T3	3	N1	0	unknown	unknown	2	0	0	0	0	1	0	1	1	1	8140/3: Adenocarcinoma, NOS	Dead (attributable to this cancer dx)	Alive or dead due to cancer
4021107	2	3	2	T2	T2	2	N1	0	unknown	unknown	3	0	1	0	0	1	0	1	31	1	8140/3: Adenocarcinoma, NOS	Dead (attributable to this cancer dx)	Alive or dead due to cancer
4022108	1	3	1	T2	T3	3	N0	0	unknown	unknown	2	0	1	0	0	1	0	1	2	1	8140/3: Adenocarcinoma, NOS	Dead (attributable to this cancer dx)	Alive or dead due to cancer
4022168	1	3	1	T4	T4	2	N1	0	4	3	1	0	0	0	0	1	0	1	31	0	8140/3: Adenocarcinoma, NOS	Alive or dead of other cause	Alive or dead due to cancer
4029516	2	3	2	T2	T2	2	N0	0	unknown	unknown	1	0	0	0	0	1	0	1	5	1	8140/3: Adenocarcinoma, NOS	Dead (attributable to this cancer dx)	Alive or dead due to cancer
4030194	1	3	1	T4	T4	2	N0	0	unknown	unknown	2	1	1	1	0	1	0	1	12	1	8140/3: Adenocarcinoma, NOS	Dead (attributable to this cancer dx)	Alive or dead due to cancer
4030393	2	3	2	T4	T4	2	N1	0	2	2	1	0	0	0	0	1	0	1	2	1	8140/3: Adenocarcinoma, NOS	Dead (attributable to this cancer dx)	Alive or dead due to cancer
4035895	1	3	1	T2	T2	2	N1	0	1	1	2	0	1	0	0	0	1	1	11	1	8480/3: Mucinous adenocarcinoma	Dead (attributable to this cancer dx)	Alive or dead due to cancer
4035944	2	3	1	T3	T2	2	N1	1	3	3	1	0	1	0	0	1	0	1	43	1	8140/3: Adenocarcinoma, NOS	Dead (attributable to this cancer dx)	Alive or dead due to cancer
4039420	2	3	1	T4	T4	2	N1	0	2	2	2	0	0	1	0	1	1	1	1	1	8246/3: Neuroendocrine carcinoma, NOS	Dead (attributable to this cancer dx)	Alive or dead due to cancer
4048137	2	3	2	T4	T4	2	N0	0	unknown	unknown	2	0	1	0	0	1	0	1	19	1	8140/3: Adenocarcinoma, NOS	Dead (missing/unknown COD)	Dead (missing/unknown COD)
4049536	1	3	2	T2	T3	3	N1	0	3	3	3	0	1	0	0	0	0	1	7	1	8140/3: Adenocarcinoma, NOS	Dead (attributable to this cancer dx)	Alive or dead due to cancer
4049901	1	3	2	T2	T3	3	N1	1	1	1	1	0	0	0	0	1	0	1	61	0	8246/3: Neuroendocrine carcinoma, NOS	Alive or dead of other cause	Alive or dead due to cancer
4050184	2	3	1	T4	T4	2	N1	0	unknown	unknown	1	0	1	0	0	0	1	1	9	1	8140/3: Adenocarcinoma, NOS	Dead (attributable to this cancer dx)	Alive or dead due to cancer
4052010	2	3	2	T2	T2	2	N1	0	unknown	unknown	1	0	0	1	0	1	0	1	1	1	8140/3: Adenocarcinoma, NOS	Dead (attributable to this cancer dx)	Alive or dead due to cancer
4052024	1	3	1	T4	T4	3	N0	0	3	3	3	0	1	0	0	1	0	1	6	1	8140/3: Adenocarcinoma, NOS	Dead (attributable to this cancer dx)	Alive or dead due to cancer
4055087	2	3	1	T3	T3	3	N1	0	unknown	unknown	1	0	1	0	0	1	0	1	12	1	8480/3: Mucinous adenocarcinoma	Dead (attributable to this cancer dx)	Alive or dead due to cancer
4056957	2	3	2	T2	T2	2	N0	0	3	3	2	0	1	0	0	1	0	1	4	1	8140/3: Adenocarcinoma, NOS	Dead (attributable to this cancer dx)	Alive or dead due to cancer
4060818	2	3	2	T4	T4	3	N1	0	unknown	unknown	1	0	1	0	0	1	0	1	14	1	8140/3: Adenocarcinoma, NOS	Dead (attributable to this cancer dx)	Alive or dead due to cancer
4060888	2	3	1	T3	T3	3	N0	0	unknown	unknown	3	0	0	0	0	0	1	1	1	1	8140/3: Adenocarcinoma, NOS	Dead (attributable to this cancer dx)	Alive or dead due to cancer
4077890	2	3	1	T4	T4	2	N0	0	unknown	unknown	2	0	1	0	0	1	0	1	2	1	8140/3: Adenocarcinoma, NOS	Dead (attributable to this cancer dx)	Alive or dead due to cancer
4086013	2	3	1	T2	T3	3	N1	0	unknown	unknown	2	0	0	0	0	0	0	1	1	1	8046/3: Non-small cell carcinoma	Alive or dead of other cause	Dead (attributable to causes other than this cancer dx)
4091046	2	3	1	T2	T2	2	N0	0	unknown	unknown	2	0	1	0	0	0	1	1	1	1	8140/3: Adenocarcinoma, NOS	Dead (attributable to this cancer dx)	Alive or dead due to cancer
4092926	1	3	2	T4	T4	3	N0	0	unknown	unknown	2	0	1	0	0	1	0	1	10	1	8140/3: Adenocarcinoma, NOS	Dead (attributable to this cancer dx)	Alive or dead due to cancer
4095752	1	3	2	T3	T3	3	N1	0	unknown	unknown	2	0	1	0	0	1	0	1	9	1	8140/3: Adenocarcinoma, NOS	Dead (attributable to this cancer dx)	Alive or dead due to cancer
4097254	1	3	1	T4	T4	3	N0	0	unknown	unknown	1	0	0	0	0	1	0	1	1	1	8140/3: Adenocarcinoma, NOS	Dead (attributable to this cancer dx)	Alive or dead due to cancer
4097530	2	3	2	T2	T3	3	N1	0	unknown	unknown	1	0	1	0	0	1	1	1	2	1	8140/3: Adenocarcinoma, NOS	Dead (attributable to this cancer dx)	Alive or dead due to cancer
4100637	1	3	1	T3	T3	3	N1	1	1	1	2	0	1	0	0	1	0	1	50	0	8246/3: Neuroendocrine carcinoma, NOS	Alive or dead of other cause	Alive or dead due to cancer
4107080	2	3	2	T4	T4	2	N0	0	unknown	unknown	1	0	1	0	0	1	0	1	4	1	8140/3: Adenocarcinoma, NOS	Dead (attributable to this cancer dx)	Alive or dead due to cancer
4107280	2	3	2	T3	T3	3	N1	1	1	1	1	0	0	0	0	1	0	1	9	1	8140/3: Adenocarcinoma, NOS	Dead (attributable to this cancer dx)	Alive or dead due to cancer
4108239	2	3	1	T2	T2	2	N0	0	2	2	3	1	1	0	0	1	0	1	6	1	8140/3: Adenocarcinoma, NOS	Dead (attributable to this cancer dx)	Alive or dead due to cancer
4112785	1	3	1	T3	T2	2	N1	1	4	3	1	0	0	0	0	0	0	1	1	1	8246/3: Neuroendocrine carcinoma, NOS	Dead (attributable to this cancer dx)	Alive or dead due to cancer
4114020	2	3	1	T4	T4	3	N1	0	1	1	2	1	1	0	0	0	0	1	6	1	8140/3: Adenocarcinoma, NOS	Dead (attributable to this cancer dx)	Alive or dead due to cancer
4114035	2	3	2	T4	T4	3	N1	0	1	1	1	0	0	0	0	1	0	1	2	1	8140/3: Adenocarcinoma, NOS	Dead (attributable to this cancer dx)	Alive or dead due to cancer
4114045	2	3	2	T2	T3	3	N0	0	unknown	unknown	2	0	1	0	0	1	0	1	2	1	8140/3: Adenocarcinoma, NOS	Dead (attributable to this cancer dx)	Alive or dead due to cancer
4116844	2	3	1	T4	T4	2	N0	0	unknown	unknown	2	0	0	0	0	0	0	1	7	1	8140/3: Adenocarcinoma, NOS	Dead (attributable to this cancer dx)	Alive or dead due to cancer
4117391	1	3	1	T3	T3	3	N1	0	unknown	unknown	2	0	1	0	0	1	0	1	1	1	8140/3: Adenocarcinoma, NOS	Dead (attributable to this cancer dx)	Alive or dead due to cancer
4117764	2	3	2	T2	T2	2	N0	0	unknown	unknown	2	0	1	0	0	1	0	1	1	1	8140/3: Adenocarcinoma, NOS	Dead (attributable to this cancer dx)	Alive or dead due to cancer
4126239	1	3	2	T3	T2	2	N1	0	unknown	unknown	2	1	1	0	0	0	0	1	24	1	8140/3: Adenocarcinoma, NOS	Dead (attributable to this cancer dx)	Alive or dead due to cancer
4127808	2	3	2	T2	T2	2	N1	0	unknown	unknown	3	0	1	0	0	1	1	1	6	1	8140/3: Adenocarcinoma, NOS	Dead (attributable to this cancer dx)	Alive or dead due to cancer
4128275	2	3	1	T4	T4	2	N0	0	unknown	unknown	1	0	0	0	0	1	0	1	4	1	8140/3: Adenocarcinoma, NOS	Dead (attributable to this cancer dx)	Alive or dead due to cancer
4128634	2	3	1	T2	T3	3	N1	0	unknown	unknown	3	0	1	0	0	0	0	1	16	1	8140/3: Adenocarcinoma, NOS	Dead (attributable to this cancer dx)	Alive or dead due to cancer
4131589	2	3	2	T4	T4	3	N0	0	3	3	2	0	1	0	0	1	1	1	1	1	8480/3: Mucinous adenocarcinoma	Dead (attributable to this cancer dx)	Alive or dead due to cancer
4131843	2	3	2	T2	T2	2	N1	0	unknown	unknown	1	0	1	0	0	1	1	1	4	1	8140/3: Adenocarcinoma, NOS	Dead (attributable to this cancer dx)	Alive or dead due to cancer
4131936	2	3	1	T2	T2	2	N1	0	unknown	unknown	2	0	0	1	0	1	1	1	1	1	8140/3: Adenocarcinoma, NOS	Dead (attributable to this cancer dx)	Alive or dead due to cancer
4133011	2	3	2	T2	T3	3	N1	0	unknown	unknown	1	0	1	0	0	1	0	1	3	1	8140/3: Adenocarcinoma, NOS	Dead (attributable to this cancer dx)	Alive or dead due to cancer
4137331	1	3	1	T3	T3	3	N1	0	1	1	2	0	1	0	0	1	0	1	10	1	8140/3: Adenocarcinoma, NOS	Dead (attributable to this cancer dx)	Alive or dead due to cancer
4535794	2	3	1	T2	T3	3	N1	0	unknown	unknown	3	0	0	0	0	0	0	1	1	1	8140/3: Adenocarcinoma, NOS	Dead (attributable to this cancer dx)	Alive or dead due to cancer
4541271	2	3	2	T3	T3	3	N0	0	unknown	unknown	2	0	0	0	0	1	0	1	2	1	8500/3: Infiltrating duct carcinoma, NOS	Dead (attributable to this cancer dx)	Alive or dead due to cancer
4542684	2	3	2	T3	T2	2	N1	0	3	3	1	0	0	0	0	1	0	1	3	1	8140/3: Adenocarcinoma, NOS	Dead (attributable to this cancer dx)	Alive or dead due to cancer
4550921	1	3	2	T2	T2	2	N0	0	3	3	3	0	1	0	0	1	0	1	12	1	8140/3: Adenocarcinoma, NOS	Dead (attributable to this cancer dx)	Alive or dead due to cancer
4551906	2	3	1	T4	T4	3	N0	0	unknown	unknown	3	0	1	0	0	0	0	1	10	1	8140/3: Adenocarcinoma, NOS	Dead (attributable to this cancer dx)	Alive or dead due to cancer
4555028	1	3	2	T1	T1	1	N0	0	unknown	unknown	1	0	1	0	0	1	0	1	15	1	8041/3: Small cell carcinoma, NOS	Dead (attributable to this cancer dx)	Alive or dead due to cancer
4557482	1	3	2	T2	T2	2	N0	0	unknown	unknown	2	0	1	0	0	1	0	1	27	1	8140/3: Adenocarcinoma, NOS	Dead (attributable to this cancer dx)	Alive or dead due to cancer
4563552	2	3	2	T4	T4	2	N1	0	unknown	unknown	3	0	0	0	0	1	0	1	1	1	8140/3: Adenocarcinoma, NOS	Dead (attributable to this cancer dx)	Alive or dead due to cancer
4563730	2	3	1	T4	T4	3	N1	0	unknown	unknown	3	0	1	0	0	1	1	1	11	1	8140/3: Adenocarcinoma, NOS	Dead (attributable to this cancer dx)	Alive or dead due to cancer
4565277	2	3	1	T2	T2	2	N0	0	unknown	unknown	1	0	1	1	0	1	0	1	4	1	8140/3: Adenocarcinoma, NOS	Dead (attributable to this cancer dx)	Alive or dead due to cancer
4565280	2	3	2	T2	T2	2	N0	1	1	1	2	0	0	0	0	0	0	0	14	0	8240/3: Carcinoid tumor, NOS	N/A not first tumor	N/A not first tumor
4568856	1	3	1	T3	T3	3	N0	0	unknown	unknown	1	1	0	0	0	1	0	1	3	1	8140/3: Adenocarcinoma, NOS	Dead (attributable to this cancer dx)	Alive or dead due to cancer
4582574	1	3	1	T3	T2	2	N0	0	unknown	unknown	1	0	0	0	0	1	0	1	1	1	8140/3: Adenocarcinoma, NOS	Dead (attributable to this cancer dx)	Alive or dead due to cancer
4584601	2	3	2	T1	T1	1	N1	0	unknown	unknown	2	0	0	0	0	1	0	1	4	0	8140/3: Adenocarcinoma, NOS	Alive or dead of other cause	Alive or dead due to cancer
4585391	1	3	1	T3	T2	2	N1	0	2	2	1	0	1	0	0	1	0	1	4	1	8140/3: Adenocarcinoma, NOS	Dead (attributable to this cancer dx)	Alive or dead due to cancer
4586024	2	3	1	T2	T2	2	N0	0	unknown	unknown	2	0	1	0	0	0	0	1	22	0	8500/3: Infiltrating duct carcinoma, NOS	Alive or dead of other cause	Alive or dead due to cancer
4587385	2	3	1	T4	T4	3	N1	0	3	3	3	0	1	0	0	1	1	1	2	1	8140/3: Adenocarcinoma, NOS	Dead (attributable to this cancer dx)	Alive or dead due to cancer
4591153	2	3	2	T4	T4	3	N1	0	3	3	3	0	0	0	0	0	0	1	1	1	8140/3: Adenocarcinoma, NOS	Dead (attributable to this cancer dx)	Alive or dead due to cancer
4591172	2	3	1	T2	T2	2	N0	0	unknown	unknown	3	0	1	0	0	0	0	1	2	1	8140/3: Adenocarcinoma, NOS	Dead (attributable to this cancer dx)	Alive or dead due to cancer
4599058	2	3	1	T3	T2	2	N1	0	unknown	unknown	1	0	0	0	0	0	0	1	1	1	8140/3: Adenocarcinoma, NOS	Dead (attributable to this cancer dx)	Alive or dead due to cancer
4600813	2	3	2	T4	T4	3	N0	0	unknown	unknown	3	0	0	0	0	0	0	1	3	1	8140/3: Adenocarcinoma, NOS	Dead (attributable to this cancer dx)	Alive or dead due to cancer
4601256	2	3	2	T3	T3	3	N1	0	unknown	unknown	1	0	1	0	0	0	1	1	4	1	8140/3: Adenocarcinoma, NOS	Dead (attributable to this cancer dx)	Alive or dead due to cancer
4611725	1	3	2	T4	T4	2	N0	0	2	2	2	0	1	0	0	1	0	1	8	1	8140/3: Adenocarcinoma, NOS	Dead (attributable to this cancer dx)	Alive or dead due to cancer
4613378	2	3	2	T4	T4	2	N0	0	unknown	unknown	2	0	1	0	0	1	1	1	6	1	8140/3: Adenocarcinoma, NOS	Dead (attributable to this cancer dx)	Alive or dead due to cancer
4613846	2	3	2	T3	T2	2	N1	0	unknown	unknown	1	0	0	0	0	1	1	1	1	1	8140/3: Adenocarcinoma, NOS	Dead (attributable to this cancer dx)	Alive or dead due to cancer
4614726	2	3	2	T3	T2	2	N0	0	unknown	unknown	1	0	0	0	0	1	0	1	2	1	8140/3: Adenocarcinoma, NOS	Dead (attributable to this cancer dx)	Alive or dead due to cancer
4614985	1	3	2	T2	T2	2	N0	0	unknown	unknown	1	1	1	1	0	0	0	1	13	0	8140/3: Adenocarcinoma, NOS	Alive or dead of other cause	Alive or dead due to cancer
4616087	1	3	2	T2	T2	2	N0	0	unknown	unknown	1	0	1	0	0	1	1	1	4	1	8140/3: Adenocarcinoma, NOS	Dead (attributable to this cancer dx)	Alive or dead due to cancer
4617580	1	3	1	T3	T1	1	N1	0	unknown	unknown	2	0	1	1	0	1	1	1	4	1	8140/3: Adenocarcinoma, NOS	Dead (attributable to this cancer dx)	Alive or dead due to cancer
4654553	2	3	2	T4	T4	2	N1	0	3	3	3	0	1	0	0	1	0	1	12	0	8246/3: Neuroendocrine carcinoma, NOS	Alive or dead of other cause	Alive or dead due to cancer
7907601	1	3	2	T4	T4	3	N1	0	3	3	3	0	1	0	0	1	0	1	7	1	8140/3: Adenocarcinoma, NOS	N/A not first tumor	N/A not first tumor
9042701	2	3	2	T4	T4	2	N1	0	unknown	unknown	1	0	0	0	0	1	0	1	3	1	8500/3: Infiltrating duct carcinoma, NOS	Dead (attributable to this cancer dx)	Alive or dead due to cancer
9043082	1	3	1	T4	T4	3	N1	0	2	2	2	0	1	0	0	1	0	1	24	0	8481/3: Mucin-producing adenocarcinoma	Alive or dead of other cause	Alive or dead due to cancer
9059515	1	3	2	T3	T2	2	N0	1	unknown	unknown	2	0	0	0	0	1	0	1	54	0	8452/3: Solid pseudopapillary carcinoma	Alive or dead of other cause	Alive or dead due to cancer
9066922	2	3	2	T4	T4	3	N0	0	1	1	3	0	1	0	0	0	1	1	5	1	8140/3: Adenocarcinoma, NOS	Dead (attributable to this cancer dx)	Alive or dead due to cancer
9493274	2	3	1	T4	T4	3	N1	0	1	1	3	0	1	0	0	1	0	1	1	1	8140/3: Adenocarcinoma, NOS	Dead (attributable to this cancer dx)	Alive or dead due to cancer
9551219	2	3	1	T3	T3	3	N0	0	2	2	1	0	1	0	0	1	0	1	6	1	8140/3: Adenocarcinoma, NOS	Alive or dead of other cause	Dead (attributable to causes other than this cancer dx)
9560235	2	3	2	T4	T4	2	N0	0	unknown	unknown	3	0	1	0	0	1	0	1	4	0	8140/3: Adenocarcinoma, NOS	Alive or dead of other cause	Alive or dead due to cancer
11732382	2	3	2	T4	T4	2	N0	0	2	2	2	0	1	0	0	0	1	0	2	1	8140/3: Adenocarcinoma, NOS	N/A not first tumor	N/A not first tumor
13421488	2	3	1	T2	T2	2	N0	0	unknown	unknown	1	0	0	1	1	1	1	0	2	1	8140/3: Adenocarcinoma, NOS	N/A not first tumor	N/A not first tumor
14518483	2	3	1	T2	T3	3	N0	0	2	2	3	1	1	0	0	1	0	1	2	1	8140/3: Adenocarcinoma, NOS	Dead (attributable to this cancer dx)	Alive or dead due to cancer
14519756	2	3	1	T4	T4	3	N0	0	2	2	2	0	1	0	0	1	0	1	4	1	8140/3: Adenocarcinoma, NOS	Dead (attributable to this cancer dx)	Alive or dead due to cancer
14571776	1	3	2	T4	T4	3	N1	0	unknown	unknown	3	0	1	0	0	1	0	1	4	1	8140/3: Adenocarcinoma, NOS	Dead (attributable to this cancer dx)	Alive or dead due to cancer
14574667	2	3	2	T4	T4	2	N0	0	unknown	unknown	2	0	0	0	0	1	0	1	4	1	8140/3: Adenocarcinoma, NOS	Dead (attributable to this cancer dx)	Alive or dead due to cancer
14574858	1	3	2	T3	T3	3	N1	0	unknown	unknown	1	0	0	0	0	1	0	0	28	0	8140/3: Adenocarcinoma, NOS	N/A not first tumor	N/A not first tumor
14622672	2	3	1	T2	T2	2	N0	0	unknown	unknown	3	0	1	0	0	1	0	1	14	1	8140/3: Adenocarcinoma, NOS	Dead (attributable to this cancer dx)	Alive or dead due to cancer
14639040	1	3	2	T2	T3	3	N1	0	1	1	2	1	0	1	0	1	0	1	34	0	8246/3: Neuroendocrine carcinoma, NOS	Alive or dead of other cause	Alive or dead due to cancer
15046486	1	3	1	T3	T3	3	N0	0	unknown	unknown	2	0	0	0	0	1	0	1	16	0	8140/3: Adenocarcinoma, NOS	Alive or dead of other cause	Alive or dead due to cancer
15063682	1	3	1	T4	T4	3	N1	0	4	3	1	1	1	0	0	0	0	1	10	1	8020/3: Carcinoma, undifferentiated, NOS	Dead (attributable to this cancer dx)	Alive or dead due to cancer
15066458	2	3	2	T2	T2	2	N0	0	unknown	unknown	2	0	1	0	0	1	0	1	22	0	8240/3: Carcinoid tumor, NOS	Alive or dead of other cause	Alive or dead due to cancer
15076940	2	3	2	T3	T2	2	N1	0	unknown	unknown	3	0	1	0	0	1	1	1	2	1	8140/3: Adenocarcinoma, NOS	Dead (attributable to this cancer dx)	Alive or dead due to cancer
15606482	2	3	1	T2	T2	2	N0	0	unknown	unknown	2	0	0	0	0	1	0	0	2	1	8140/3: Adenocarcinoma, NOS	N/A not first tumor	N/A not first tumor
15638423	2	3	2	T2	T2	2	N0	0	unknown	unknown	1	0	0	0	0	1	0	0	2	1	8140/3: Adenocarcinoma, NOS	N/A not first tumor	N/A not first tumor
15718121	1	3	2	T2	T2	2	N0	0	3	3	1	0	0	0	0	1	0	1	1	1	8500/3: Infiltrating duct carcinoma, NOS	Dead (attributable to this cancer dx)	Alive or dead due to cancer
16043803	2	3	2	T2	T3	3	N0	0	unknown	unknown	2	0	0	0	0	0	0	0	4	1	8140/3: Adenocarcinoma, NOS	N/A not first tumor	N/A not first tumor
16045608	2	3	1	T1	T1	1	N0	0	unknown	unknown	1	0	1	1	0	1	0	0	1	1	8140/3: Adenocarcinoma, NOS	N/A not first tumor	N/A not first tumor
16063812	2	3	2	T2	T3	3	N0	0	unknown	unknown	1	0	0	1	0	0	0	0	32	1	8000/3: Neoplasm, malignant	N/A not first tumor	N/A not first tumor
16070156	2	3	2	T3	T3	3	N1	1	unknown	unknown	3	0	1	0	0	0	0	0	10	1	8560/3: Adenosquamous carcinoma	N/A not first tumor	N/A not first tumor
16088254	2	3	2	T2	T2	2	N0	0	unknown	unknown	1	0	0	0	0	0	1	0	5	1	8500/3: Infiltrating duct carcinoma, NOS	N/A not first tumor	N/A not first tumor
16100862	2	3	1	T3	T3	3	N0	0	unknown	unknown	1	0	0	0	0	1	0	0	2	1	8140/3: Adenocarcinoma, NOS	N/A not first tumor	N/A not first tumor
16103260	2	3	1	T4	T4	3	N1	0	unknown	unknown	1	0	1	0	0	1	0	0	8	1	8140/3: Adenocarcinoma, NOS	N/A not first tumor	N/A not first tumor
16109238	2	3	1	T3	T2	2	N1	0	unknown	unknown	1	0	0	0	0	1	0	0	3	1	8140/3: Adenocarcinoma, NOS	N/A not first tumor	N/A not first tumor
16113225	2	3	1	T4	T4	2	N0	0	unknown	unknown	2	1	1	0	0	0	0	0	23	1	8480/3: Mucinous adenocarcinoma	N/A not first tumor	N/A not first tumor
16136865	2	3	1	T3	T3	3	N1	1	3	3	2	0	1	0	0	1	1	0	4	1	8500/3: Infiltrating duct carcinoma, NOS	N/A not first tumor	N/A not first tumor
16468862	2	3	1	T3	T3	3	N0	0	3	3	2	0	1	0	0	1	0	0	4	1	8010/3: Carcinoma, NOS	N/A not first tumor	N/A not first tumor
16484876	2	3	1	T3	T1	1	N0	1	3	3	1	0	1	0	0	1	0	0	12	1	8140/3: Adenocarcinoma, NOS	N/A not first tumor	N/A not first tumor
16486973	2	3	2	T4	T4	3	N1	0	3	3	3	0	1	0	0	1	0	1	6	1	8140/3: Adenocarcinoma, NOS	N/A not first tumor	N/A not first tumor
16489056	2	3	1	T4	T4	3	N0	0	unknown	unknown	3	0	0	0	0	1	1	0	2	1	8140/3: Adenocarcinoma, NOS	N/A not first tumor	N/A not first tumor
16493119	2	3	2	T2	T2	2	N0	0	unknown	unknown	2	0	1	0	0	1	0	1	1	1	8140/3: Adenocarcinoma, NOS	Dead (attributable to this cancer dx)	Alive or dead due to cancer
16495303	2	3	2	T2	T2	2	N0	0	unknown	unknown	1	0	1	0	0	1	0	0	3	1	8140/3: Adenocarcinoma, NOS	N/A not first tumor	N/A not first tumor
16504779	2	3	1	T2	T2	2	N0	0	unknown	unknown	1	0	0	0	0	1	0	1	1	1	8140/3: Adenocarcinoma, NOS	Dead (attributable to this cancer dx)	Alive or dead due to cancer
16505403	1	3	2	T3	T3	3	N0	0	unknown	unknown	1	0	0	0	0	1	0	1	52	1	8246/3: Neuroendocrine carcinoma, NOS	Dead (attributable to this cancer dx)	Alive or dead due to cancer
16505538	2	3	1	T4	T4	3	N1	0	unknown	unknown	2	0	1	0	0	1	0	1	8	1	8140/3: Adenocarcinoma, NOS	Dead (attributable to this cancer dx)	Alive or dead due to cancer
16506347	1	3	2	T4	T4	3	N0	0	unknown	unknown	2	0	0	0	0	1	0	1	4	1	8452/3: Solid pseudopapillary carcinoma	Dead (attributable to this cancer dx)	Alive or dead due to cancer
16506606	1	3	1	T3	T3	3	N1	0	unknown	unknown	2	0	1	0	0	1	0	1	18	1	8140/3: Adenocarcinoma, NOS	Dead (attributable to this cancer dx)	Alive or dead due to cancer
16508259	2	3	2	T4	T4	2	N0	0	2	2	2	0	0	0	0	1	0	1	6	1	8140/3: Adenocarcinoma, NOS	Dead (attributable to this cancer dx)	Alive or dead due to cancer
16510240	2	3	2	T4	T4	3	N1	0	unknown	unknown	2	0	1	0	0	1	1	1	3	1	8140/3: Adenocarcinoma, NOS	Dead (attributable to this cancer dx)	Alive or dead due to cancer
16510980	1	3	1	T2	T2	2	N0	0	unknown	unknown	1	1	1	0	0	1	0	1	7	1	8140/3: Adenocarcinoma, NOS	Dead (attributable to this cancer dx)	Alive or dead due to cancer
16512436	2	3	2	T1	T1	1	N1	0	unknown	unknown	1	0	0	0	0	1	0	0	5	1	8500/3: Infiltrating duct carcinoma, NOS	N/A not first tumor	N/A not first tumor
16512706	2	3	1	T2	T2	2	N0	0	3	3	1	0	1	0	0	1	0	1	8	1	8500/3: Infiltrating duct carcinoma, NOS	Dead (attributable to this cancer dx)	Alive or dead due to cancer
16513838	2	3	1	T3	T3	3	N0	0	unknown	unknown	3	0	0	0	0	1	0	1	1	1	8480/3: Mucinous adenocarcinoma	Dead (attributable to this cancer dx)	Alive or dead due to cancer
16514423	1	3	2	T4	T4	2	N1	0	unknown	unknown	1	1	1	0	0	1	0	1	1	1	8140/3: Adenocarcinoma, NOS	Dead (attributable to this cancer dx)	Alive or dead due to cancer
16514743	2	3	1	T4	T4	3	N1	0	unknown	unknown	3	0	1	0	0	1	1	1	14	1	8140/3: Adenocarcinoma, NOS	Dead (attributable to this cancer dx)	Alive or dead due to cancer
16515223	2	3	2	T2	T2	2	N1	0	unknown	unknown	2	0	0	0	0	0	1	1	8	1	8140/3: Adenocarcinoma, NOS	Dead (attributable to this cancer dx)	Alive or dead due to cancer
16518679	2	3	1	T3	T2	2	N0	0	unknown	unknown	2	0	0	0	0	1	0	1	2	1	8140/3: Adenocarcinoma, NOS	Dead (attributable to this cancer dx)	Alive or dead due to cancer
16518748	1	3	2	T2	T2	2	N1	0	unknown	unknown	1	0	0	0	0	0	0	1	1	1	8500/3: Infiltrating duct carcinoma, NOS	Dead (attributable to this cancer dx)	Alive or dead due to cancer
16519247	1	3	2	T3	T2	2	N1	1	2	2	1	0	1	0	0	1	0	1	7	1	8500/3: Infiltrating duct carcinoma, NOS	Dead (attributable to this cancer dx)	Alive or dead due to cancer
16519565	1	3	2	T3	T2	2	N1	0	unknown	unknown	3	0	0	0	0	0	0	1	4	1	8140/3: Adenocarcinoma, NOS	Dead (attributable to this cancer dx)	Alive or dead due to cancer
16519580	2	3	1	T3	T3	3	N0	0	unknown	unknown	1	0	1	0	0	1	0	1	2	1	8140/3: Adenocarcinoma, NOS	Dead (attributable to this cancer dx)	Alive or dead due to cancer
16520928	2	3	1	T2	T3	3	N1	0	unknown	unknown	2	0	1	0	0	1	1	1	14	1	8140/3: Adenocarcinoma, NOS	Dead (attributable to this cancer dx)	Alive or dead due to cancer
16523125	2	3	2	T2	T2	2	N0	0	1	1	3	0	1	0	0	0	1	1	12	1	8140/3: Adenocarcinoma, NOS	Dead (attributable to this cancer dx)	Alive or dead due to cancer
16524443	1	3	2	T3	T2	2	N1	1	3	3	1	1	1	0	0	0	1	1	12	1	8140/3: Adenocarcinoma, NOS	Dead (attributable to this cancer dx)	Alive or dead due to cancer
16524965	2	3	1	T2	T2	2	N0	0	2	2	2	0	1	0	0	1	1	1	12	1	8140/3: Adenocarcinoma, NOS	Dead (attributable to this cancer dx)	Alive or dead due to cancer
16526095	2	3	1	T3	T2	2	N1	1	3	3	1	0	1	0	0	1	0	1	12	1	8246/3: Neuroendocrine carcinoma, NOS	Dead (attributable to this cancer dx)	Alive or dead due to cancer
16526346	1	3	2	T2	T2	2	N0	0	unknown	unknown	1	0	1	0	0	1	0	1	5	1	8140/3: Adenocarcinoma, NOS	Dead (attributable to this cancer dx)	Alive or dead due to cancer
16526945	2	3	2	T2	T2	2	N0	0	unknown	unknown	2	0	1	0	0	0	0	1	9	1	8500/3: Infiltrating duct carcinoma, NOS	N/A not first tumor	N/A not first tumor
16527547	2	3	2	T2	T2	2	N0	0	unknown	unknown	1	0	0	0	0	1	0	1	3	1	8140/3: Adenocarcinoma, NOS	Dead (attributable to this cancer dx)	Alive or dead due to cancer
16528499	2	3	1	T2	T2	2	N0	0	3	3	2	0	1	0	0	1	0	1	3	1	8010/3: Carcinoma, NOS	Dead (attributable to this cancer dx)	Alive or dead due to cancer
16528939	1	3	2	T4	T4	3	N0	0	3	3	1	1	0	0	0	1	0	1	2	1	8140/3: Adenocarcinoma, NOS	Dead (attributable to this cancer dx)	Alive or dead due to cancer
16529690	2	3	1	T2	T2	2	N0	0	3	3	2	0	1	0	0	1	0	1	9	1	8140/3: Adenocarcinoma, NOS	Dead (attributable to this cancer dx)	Alive or dead due to cancer
16530109	2	3	2	T3	T3	3	N1	0	1	1	1	0	1	0	0	1	0	1	3	1	8140/3: Adenocarcinoma, NOS	Dead (attributable to this cancer dx)	Alive or dead due to cancer
16531671	1	3	1	T3	T2	2	N0	0	unknown	unknown	2	0	1	0	0	1	0	1	20	1	8140/3: Adenocarcinoma, NOS	Dead (attributable to this cancer dx)	Alive or dead due to cancer
16532633	1	3	1	T3	T3	3	N0	0	unknown	unknown	2	0	0	0	0	1	0	1	28	1	8140/3: Adenocarcinoma, NOS	Alive or dead of other cause	Dead (attributable to causes other than this cancer dx)
16533097	2	3	1	T4	T4	2	N1	0	unknown	unknown	2	0	1	0	0	0	1	1	10	1	8140/3: Adenocarcinoma, NOS	Dead (attributable to this cancer dx)	Alive or dead due to cancer
16533432	2	3	1	T2	T3	3	N0	0	2	2	3	0	0	0	0	1	0	1	13	1	8500/3: Infiltrating duct carcinoma, NOS	Dead (attributable to this cancer dx)	Alive or dead due to cancer
16533661	1	3	2	T2	T3	3	N1	0	unknown	unknown	3	0	0	0	0	1	0	1	1	1	8140/3: Adenocarcinoma, NOS	Dead (attributable to this cancer dx)	Alive or dead due to cancer
16535208	1	3	1	T4	T4	3	N1	0	unknown	unknown	2	0	1	0	0	1	1	1	1	1	8140/3: Adenocarcinoma, NOS	Dead (attributable to this cancer dx)	Alive or dead due to cancer
16535802	1	3	1	T2	T2	2	N0	0	unknown	unknown	1	0	1	0	0	0	1	1	16	1	8480/3: Mucinous adenocarcinoma	Dead (attributable to this cancer dx)	Alive or dead due to cancer
16537006	2	3	1	T2	T3	3	N0	0	3	3	1	0	0	0	0	1	0	1	71	0	8240/3: Carcinoid tumor, NOS	Alive or dead of other cause	Alive or dead due to cancer
16537209	1	3	1	T4	T4	3	N1	0	unknown	unknown	1	1	0	0	0	0	1	1	2	1	8010/3: Carcinoma, NOS	Dead (attributable to this cancer dx)	Alive or dead due to cancer
16537429	2	3	2	T2	T2	2	N0	0	unknown	unknown	1	0	1	1	0	0	1	1	11	1	8246/3: Neuroendocrine carcinoma, NOS	Dead (attributable to this cancer dx)	Alive or dead due to cancer
16537902	2	3	1	T2	T2	2	N0	0	unknown	unknown	3	0	1	0	0	0	0	1	25	1	8140/3: Adenocarcinoma, NOS	Dead (attributable to this cancer dx)	Alive or dead due to cancer
16539577	2	3	2	T3	T2	2	N1	0	3	3	1	0	0	0	0	1	0	1	1	1	8140/3: Adenocarcinoma, NOS	Dead (attributable to this cancer dx)	Alive or dead due to cancer
16539585	2	3	1	T3	T1	1	N0	0	unknown	unknown	1	0	1	0	0	0	1	1	25	1	8140/3: Adenocarcinoma, NOS	Dead (attributable to this cancer dx)	Alive or dead due to cancer
16539621	2	3	2	T4	T4	2	N0	0	unknown	unknown	3	0	0	0	0	1	0	1	1	1	8140/3: Adenocarcinoma, NOS	Dead (attributable to this cancer dx)	Alive or dead due to cancer
16539630	1	3	1	T2	T2	2	N0	0	unknown	unknown	3	1	1	1	0	0	1	1	5	1	8010/3: Carcinoma, NOS	Dead (attributable to this cancer dx)	Alive or dead due to cancer
16539963	1	3	1	T2	T3	3	N0	0	unknown	unknown	1	0	0	0	0	1	1	1	1	1	8140/3: Adenocarcinoma, NOS	Dead (attributable to this cancer dx)	Alive or dead due to cancer
16540238	2	3	1	T2	T3	3	N0	0	unknown	unknown	3	0	0	0	0	1	0	1	2	1	8500/3: Infiltrating duct carcinoma, NOS	Dead (attributable to this cancer dx)	Alive or dead due to cancer
16541105	2	3	1	T1	T1	1	N1	0	unknown	unknown	3	0	1	0	0	1	1	1	8	1	8140/3: Adenocarcinoma, NOS	Dead (attributable to this cancer dx)	Alive or dead due to cancer
16541199	2	3	1	T2	T3	3	N0	0	unknown	unknown	1	0	1	0	0	1	0	1	7	1	8140/3: Adenocarcinoma, NOS	Dead (attributable to this cancer dx)	Alive or dead due to cancer
16541202	2	3	2	T2	T2	2	N0	0	unknown	unknown	1	0	1	0	0	0	1	1	14	1	8140/3: Adenocarcinoma, NOS	Dead (attributable to this cancer dx)	Alive or dead due to cancer
16541839	1	3	2	T2	T2	2	N0	0	unknown	unknown	2	0	0	0	0	1	0	1	5	1	8246/3: Neuroendocrine carcinoma, NOS	Dead (attributable to this cancer dx)	Alive or dead due to cancer
16543491	1	3	1	T2	T3	3	N1	0	2	2	3	0	1	0	0	1	0	1	41	0	8249/3: Atypical carcinoid tumor	Alive or dead of other cause	Alive or dead due to cancer
16543778	2	3	2	T4	T4	3	N0	0	unknown	unknown	2	0	1	0	0	1	0	1	4	1	8140/3: Adenocarcinoma, NOS	Dead (attributable to this cancer dx)	Alive or dead due to cancer
16544691	1	3	2	T3	T3	3	N0	1	1	1	2	0	1	0	0	1	0	1	41	0	8246/3: Neuroendocrine carcinoma, NOS	Alive or dead of other cause	Alive or dead due to cancer
16544964	2	3	2	T2	T2	2	N0	0	2	2	2	0	1	0	0	0	0	1	14	1	8140/3: Adenocarcinoma, NOS	Dead (attributable to this cancer dx)	Alive or dead due to cancer
16545182	2	3	2	T4	T4	2	N1	0	unknown	unknown	2	1	1	1	0	0	0	1	1	1	8500/3: Infiltrating duct carcinoma, NOS	Dead (attributable to this cancer dx)	Alive or dead due to cancer
16548363	2	3	2	T4	T4	3	N0	0	unknown	unknown	2	0	0	0	0	0	0	1	3	1	8140/3: Adenocarcinoma, NOS	Dead (attributable to this cancer dx)	Alive or dead due to cancer
16549983	2	3	1	T3	T2	2	N0	0	3	3	2	0	1	0	0	0	0	1	2	1	8500/3: Infiltrating duct carcinoma, NOS	Dead (attributable to this cancer dx)	Alive or dead due to cancer
16550676	2	3	2	T2	T2	2	N0	0	unknown	unknown	1	1	0	0	0	1	0	1	3	1	8140/3: Adenocarcinoma, NOS	Dead (attributable to this cancer dx)	Alive or dead due to cancer
16550836	2	3	1	T3	T2	2	N0	0	unknown	unknown	1	0	0	0	0	1	0	1	4	1	8140/3: Adenocarcinoma, NOS	Dead (attributable to this cancer dx)	Alive or dead due to cancer
16553979	1	3	1	T3	T3	3	N1	1	2	2	3	0	1	0	0	0	0	1	40	0	8500/3: Infiltrating duct carcinoma, NOS	Alive or dead of other cause	Alive or dead due to cancer
16553992	2	3	2	T4	T4	3	N1	0	unknown	unknown	2	0	1	0	0	1	0	1	20	1	8246/3: Neuroendocrine carcinoma, NOS	Dead (attributable to this cancer dx)	Alive or dead due to cancer
16555942	2	3	1	T3	T2	2	N0	0	unknown	unknown	1	0	1	0	0	0	0	1	21	1	8500/3: Infiltrating duct carcinoma, NOS	Dead (attributable to this cancer dx)	Alive or dead due to cancer
16557038	2	3	1	T3	T2	2	N0	0	unknown	unknown	1	0	0	0	0	0	0	1	3	1	8140/3: Adenocarcinoma, NOS	Dead (attributable to this cancer dx)	Alive or dead due to cancer
16557108	2	3	1	T3	T2	2	N1	0	unknown	unknown	3	0	1	0	0	1	0	1	3	1	8140/3: Adenocarcinoma, NOS	Dead (attributable to this cancer dx)	Alive or dead due to cancer
16557569	2	3	2	T2	T2	2	N0	0	3	3	2	0	1	0	0	0	1	1	14	1	8140/3: Adenocarcinoma, NOS	Dead (attributable to this cancer dx)	Alive or dead due to cancer
16557670	2	3	2	T3	T3	3	N1	0	unknown	unknown	3	0	0	0	0	0	0	1	4	1	8140/3: Adenocarcinoma, NOS	Dead (attributable to this cancer dx)	Alive or dead due to cancer
16557991	1	3	1	T2	T3	3	N1	0	unknown	unknown	1	0	1	0	0	1	1	1	4	1	8140/3: Adenocarcinoma, NOS	Dead (attributable to this cancer dx)	Alive or dead due to cancer
16558746	2	3	1	T3	T3	3	N0	1	2	2	2	0	1	0	0	0	0	1	9	1	8500/3: Infiltrating duct carcinoma, NOS	Dead (attributable to this cancer dx)	Alive or dead due to cancer
16559211	2	3	2	T3	T3	3	N1	0	unknown	unknown	3	0	0	0	0	0	1	1	2	1	8140/3: Adenocarcinoma, NOS	Dead (attributable to this cancer dx)	Alive or dead due to cancer
16559369	2	3	1	T4	T4	3	N0	0	unknown	unknown	1	0	1	0	0	0	1	1	2	1	8500/3: Infiltrating duct carcinoma, NOS	Alive or dead of other cause	Dead (attributable to causes other than this cancer dx)
16559736	1	3	2	T2	T3	3	N0	0	unknown	unknown	1	0	1	0	0	1	0	1	5	1	8500/3: Infiltrating duct carcinoma, NOS	Dead (attributable to this cancer dx)	Alive or dead due to cancer
16561219	1	3	1	T2	T3	3	N0	0	unknown	unknown	3	0	0	0	0	0	0	1	2	1	8500/3: Infiltrating duct carcinoma, NOS	Dead (attributable to this cancer dx)	Alive or dead due to cancer
16561924	2	3	1	T3	T3	3	N1	0	unknown	unknown	2	0	0	0	0	1	0	1	1	1	8140/3: Adenocarcinoma, NOS	Dead (attributable to this cancer dx)	Alive or dead due to cancer
16562313	2	3	2	T2	T2	2	N0	0	unknown	unknown	2	0	1	0	0	0	0	1	25	1	8140/3: Adenocarcinoma, NOS	Dead (attributable to this cancer dx)	Alive or dead due to cancer
16562922	2	3	1	T2	T3	3	N0	0	unknown	unknown	2	0	0	0	0	1	0	1	5	1	8240/3: Carcinoid tumor, NOS	Dead (attributable to this cancer dx)	Alive or dead due to cancer
16563431	1	3	1	T4	T4	1	N0	0	3	3	1	0	1	0	0	0	0	1	22	0	8140/3: Adenocarcinoma, NOS	Alive or dead of other cause	Alive or dead due to cancer
16563722	2	3	2	T2	T2	2	N1	0	unknown	unknown	3	0	0	0	0	1	1	1	3	1	8140/3: Adenocarcinoma, NOS	Dead (attributable to this cancer dx)	Alive or dead due to cancer
16563779	2	3	1	T2	T2	2	N0	0	unknown	unknown	2	0	1	0	0	1	0	1	1	1	8140/3: Adenocarcinoma, NOS	Dead (attributable to this cancer dx)	Alive or dead due to cancer
16564756	1	3	1	T2	T3	3	N1	0	unknown	unknown	2	0	0	0	0	1	1	1	1	1	8140/3: Adenocarcinoma, NOS	Dead (attributable to this cancer dx)	Alive or dead due to cancer
16565460	1	3	1	T4	T4	3	N0	0	unknown	unknown	2	0	1	0	0	1	0	1	3	1	8140/3: Adenocarcinoma, NOS	Dead (attributable to this cancer dx)	Alive or dead due to cancer
16567283	1	3	2	T2	T3	3	N0	0	unknown	unknown	2	0	1	0	0	0	0	1	10	1	8500/3: Infiltrating duct carcinoma, NOS	Dead (attributable to this cancer dx)	Alive or dead due to cancer
16568162	1	3	2	T3	T2	2	N1	0	unknown	unknown	1	0	1	0	0	1	0	1	4	1	8140/3: Adenocarcinoma, NOS	Dead (attributable to this cancer dx)	Alive or dead due to cancer
16569164	2	3	2	T2	T3	3	N0	0	unknown	unknown	1	0	0	0	0	1	0	1	2	1	8140/3: Adenocarcinoma, NOS	Dead (attributable to this cancer dx)	Alive or dead due to cancer
16569990	2	3	2	T2	T2	2	N0	0	unknown	unknown	1	0	1	0	0	1	0	1	5	1	8140/3: Adenocarcinoma, NOS	Dead (attributable to this cancer dx)	Alive or dead due to cancer
16570438	2	3	2	T2	T3	3	N0	0	unknown	unknown	2	0	1	0	0	1	1	1	5	1	8500/3: Infiltrating duct carcinoma, NOS	Dead (attributable to this cancer dx)	Alive or dead due to cancer
16570650	2	3	1	T3	T3	3	N0	0	unknown	unknown	2	0	1	0	0	1	0	1	16	0	8140/3: Adenocarcinoma, NOS	Alive or dead of other cause	Alive or dead due to cancer
16570824	2	3	1	T3	T3	3	N1	0	unknown	unknown	1	0	1	0	0	1	0	1	3	1	8010/3: Carcinoma, NOS	Dead (attributable to this cancer dx)	Alive or dead due to cancer
16571179	1	3	2	T4	T4	3	N0	0	unknown	unknown	3	0	1	0	0	1	0	1	15	0	8140/3: Adenocarcinoma, NOS	Alive or dead of other cause	Alive or dead due to cancer
16574518	2	3	2	T2	T2	2	N0	0	unknown	unknown	3	0	1	0	0	1	0	1	3	1	8140/3: Adenocarcinoma, NOS	Dead (attributable to this cancer dx)	Alive or dead due to cancer
16575243	2	3	2	T2	T2	2	N0	0	unknown	unknown	3	0	0	0	0	1	0	1	7	1	8140/3: Adenocarcinoma, NOS	Dead (attributable to this cancer dx)	Alive or dead due to cancer
16575841	2	3	1	T3	T3	3	N0	0	unknown	unknown	2	0	1	0	0	0	0	1	10	1	8140/3: Adenocarcinoma, NOS	Dead (attributable to this cancer dx)	Alive or dead due to cancer
16576097	2	3	2	T4	T4	2	N1	0	3	3	2	0	1	0	0	1	1	1	1	1	8140/3: Adenocarcinoma, NOS	Dead (attributable to this cancer dx)	Alive or dead due to cancer
16579434	2	3	1	T2	T3	3	N0	0	unknown	unknown	2	0	1	0	0	1	0	1	2	1	8140/3: Adenocarcinoma, NOS	Dead (attributable to this cancer dx)	Alive or dead due to cancer
16579695	2	3	1	T3	T2	2	N0	0	unknown	unknown	3	0	1	0	0	1	0	1	5	1	8240/3: Carcinoid tumor, NOS	Dead (attributable to this cancer dx)	Alive or dead due to cancer
16582121	2	3	2	T4	T4	2	N0	0	unknown	unknown	3	0	0	0	0	1	0	1	12	0	8140/3: Adenocarcinoma, NOS	Alive or dead of other cause	Alive or dead due to cancer
16582598	2	3	2	T1	T1	1	N0	0	unknown	unknown	3	0	1	0	0	1	0	1	2	1	8246/3: Neuroendocrine carcinoma, NOS	Dead (attributable to this cancer dx)	Alive or dead due to cancer
20632187	1	3	1	T4	T4	3	N1	0	unknown	unknown	3	0	1	0	0	1	0	1	2	1	8010/3: Carcinoma, NOS	Dead (attributable to this cancer dx)	Alive or dead due to cancer
22503862	2	3	2	T2	T3	3	N0	0	unknown	unknown	2	0	1	0	0	1	0	1	3	1	8140/3: Adenocarcinoma, NOS	Dead (attributable to this cancer dx)	Alive or dead due to cancer
22533868	2	3	1	T3	T3	3	N0	0	unknown	unknown	2	0	0	0	0	1	0	1	2	1	8140/3: Adenocarcinoma, NOS	Dead (attributable to this cancer dx)	Alive or dead due to cancer
23557264	2	3	2	T3	T3	3	N0	0	unknown	unknown	2	0	1	0	0	1	1	0	4	1	8140/3: Adenocarcinoma, NOS	N/A not first tumor	N/A not first tumor
25885146	2	3	1	T3	T2	2	N0	1	unknown	unknown	1	1	1	0	0	1	0	0	26	1	8500/3: Infiltrating duct carcinoma, NOS	N/A not first tumor	N/A not first tumor
26303055	2	3	1	T1	T1	1	N0	0	unknown	unknown	1	0	1	0	0	1	0	0	21	0	8500/3: Infiltrating duct carcinoma, NOS	N/A not first tumor	N/A not first tumor
26426262	2	3	1	T3	T3	3	N0	0	unknown	unknown	1	0	0	0	0	1	0	1	1	1	8140/3: Adenocarcinoma, NOS	Dead (attributable to this cancer dx)	Alive or dead due to cancer
26436625	1	3	2	T4	T4	3	N0	0	unknown	unknown	2	0	1	0	0	1	1	1	6	1	8140/3: Adenocarcinoma, NOS	Dead (attributable to this cancer dx)	Alive or dead due to cancer
26440953	2	3	1	T4	T4	2	N0	0	2	2	2	0	0	0	0	1	0	1	1	1	8140/3: Adenocarcinoma, NOS	Dead (attributable to this cancer dx)	Alive or dead due to cancer
26447383	2	3	2	T3	T2	2	N1	0	unknown	unknown	1	0	1	0	0	1	0	1	4	1	8010/3: Carcinoma, NOS	Dead (attributable to this cancer dx)	Alive or dead due to cancer
26871553	2	3	1	T3	T3	3	N0	0	unknown	unknown	2	0	1	1	0	1	0	1	1	1	8140/3: Adenocarcinoma, NOS	Alive or dead of other cause	Dead (attributable to causes other than this cancer dx)
26876065	2	3	2	T4	T4	3	N0	0	2	2	2	0	1	0	0	1	0	1	3	1	8140/3: Adenocarcinoma, NOS	Dead (attributable to this cancer dx)	Alive or dead due to cancer
26885516	2	3	2	T2	T3	3	N0	1	1	1	2	0	0	0	0	1	0	1	19	1	8246/3: Neuroendocrine carcinoma, NOS	Dead (attributable to this cancer dx)	Alive or dead due to cancer
26893173	2	3	1	T2	T2	2	N0	0	unknown	unknown	3	0	0	0	0	1	0	1	1	1	8140/3: Adenocarcinoma, NOS	Dead (attributable to this cancer dx)	Alive or dead due to cancer
26910205	2	3	2	T3	T2	2	N0	0	unknown	unknown	2	0	0	0	0	1	0	1	1	1	8500/3: Infiltrating duct carcinoma, NOS	Dead (attributable to this cancer dx)	Alive or dead due to cancer
26913207	1	3	1	T2	T2	2	N0	0	unknown	unknown	2	0	1	0	0	1	0	1	15	1	8140/3: Adenocarcinoma, NOS	Dead (attributable to this cancer dx)	Alive or dead due to cancer
26919591	2	3	2	T3	T3	3	N0	0	unknown	unknown	2	0	1	0	0	1	0	0	20	1	8500/3: Infiltrating duct carcinoma, NOS	N/A not first tumor	N/A not first tumor
26942665	2	3	1	T1	T1	1	N0	0	unknown	unknown	1	0	1	0	0	1	0	1	21	1	8246/3: Neuroendocrine carcinoma, NOS	Dead (attributable to this cancer dx)	Alive or dead due to cancer
26948212	2	3	1	T3	T3	3	N0	0	3	3	1	0	0	0	0	1	0	1	1	1	8140/3: Adenocarcinoma, NOS	Dead (missing/unknown COD)	Dead (missing/unknown COD)
26954981	1	3	2	T3	T3	3	N1	1	unknown	unknown	2	0	1	0	0	1	0	1	38	1	8140/3: Adenocarcinoma, NOS	Dead (attributable to this cancer dx)	Alive or dead due to cancer
26974339	2	3	2	T3	T3	3	N1	1	3	3	2	0	1	0	0	0	0	1	8	1	8140/3: Adenocarcinoma, NOS	Dead (attributable to this cancer dx)	Alive or dead due to cancer
26981867	2	3	1	T4	T4	3	N1	0	unknown	unknown	3	0	1	0	0	0	1	1	24	1	8140/3: Adenocarcinoma, NOS	Dead (attributable to this cancer dx)	Alive or dead due to cancer
26984203	1	3	2	T3	T3	3	N1	0	3	3	1	1	1	0	0	1	0	1	14	1	8140/3: Adenocarcinoma, NOS	Dead (attributable to this cancer dx)	Alive or dead due to cancer
26991594	2	3	2	T2	T2	2	N0	0	2	2	1	0	1	0	0	0	1	1	26	0	8500/3: Infiltrating duct carcinoma, NOS	Alive or dead of other cause	Alive or dead due to cancer
26995811	1	3	1	T2	T2	2	N1	0	unknown	unknown	1	0	1	1	0	1	0	1	12	1	8140/3: Adenocarcinoma, NOS	Dead (attributable to this cancer dx)	Alive or dead due to cancer
27001023	1	3	2	T2	T3	3	N0	0	unknown	unknown	2	0	1	0	0	1	0	1	15	1	8140/3: Adenocarcinoma, NOS	Dead (attributable to this cancer dx)	Alive or dead due to cancer
27011608	1	3	1	T2	T2	2	N0	0	unknown	unknown	3	0	1	0	0	1	0	1	15	1	8574/3: Adenocarcinoma with neuroendocrine differentiation	Dead (attributable to this cancer dx)	Alive or dead due to cancer
27034780	2	3	2	T4	T4	3	N0	0	unknown	unknown	1	0	0	0	0	1	0	1	2	1	8140/3: Adenocarcinoma, NOS	Dead (attributable to this cancer dx)	Alive or dead due to cancer
27465827	2	3	1	T4	T4	3	N0	0	unknown	unknown	2	0	1	0	0	0	1	1	8	1	8500/3: Infiltrating duct carcinoma, NOS	Dead (attributable to this cancer dx)	Alive or dead due to cancer
27496474	2	3	1	T3	T3	3	N1	0	unknown	unknown	1	0	1	0	0	1	0	1	4	1	8500/3: Infiltrating duct carcinoma, NOS	Dead (attributable to this cancer dx)	Alive or dead due to cancer
29355349	1	3	1	T3	T2	2	N0	1	2	2	1	0	1	0	0	0	0	1	14	1	8140/3: Adenocarcinoma, NOS	Dead (attributable to this cancer dx)	Alive or dead due to cancer
29420900	1	3	2	T3	T3	3	N0	0	unknown	unknown	3	0	1	0	0	1	0	1	21	0	8140/3: Adenocarcinoma, NOS	Alive or dead of other cause	Alive or dead due to cancer
30892674	2	3	1	T2	T2	2	N0	0	unknown	unknown	2	0	1	0	0	1	0	0	52	0	8140/3: Adenocarcinoma, NOS	N/A not first tumor	N/A not first tumor
30900848	2	3	2	T2	T2	2	N0	0	2	2	1	0	0	0	0	1	0	1	1	1	8560/3: Adenosquamous carcinoma	N/A not first tumor	N/A not first tumor
31452911	2	3	1	T2	T2	2	N0	0	unknown	unknown	1	0	1	0	0	0	1	1	81	0	8140/3: Adenocarcinoma, NOS	Alive or dead of other cause	Alive or dead due to cancer
31483021	1	3	2	T3	T3	3	N0	0	unknown	unknown	1	0	1	0	0	1	0	0	29	1	8140/3: Adenocarcinoma, NOS	N/A not first tumor	N/A not first tumor
31889535	1	3	1	T3	T2	2	N0	0	unknown	unknown	2	0	1	0	0	1	0	1	14	1	8140/3: Adenocarcinoma, NOS	Dead (attributable to this cancer dx)	Alive or dead due to cancer
31900543	1	3	1	T3	T2	2	N1	0	unknown	unknown	1	0	1	0	0	1	0	1	3	1	8140/3: Adenocarcinoma, NOS	Dead (attributable to this cancer dx)	Alive or dead due to cancer
31902224	2	3	2	T3	T2	2	N0	1	2	2	1	1	1	0	0	0	0	1	29	0	8140/3: Adenocarcinoma, NOS	Alive or dead of other cause	Alive or dead due to cancer
31912393	2	3	2	T1	T1	1	N0	0	unknown	unknown	2	0	0	0	0	0	1	0	16	1	8140/3: Adenocarcinoma, NOS	N/A not first tumor	N/A not first tumor
31918535	2	3	1	T2	T3	3	N1	0	unknown	unknown	2	0	1	0	0	1	0	1	4	1	8140/3: Adenocarcinoma, NOS	Dead (attributable to this cancer dx)	Alive or dead due to cancer
31943088	2	3	2	T1	T1	1	N1	0	2	2	1	0	0	0	0	0	1	0	5	1	8140/3: Adenocarcinoma, NOS	N/A not first tumor	N/A not first tumor
31949463	2	3	1	T4	T4	3	N0	0	unknown	unknown	3	0	1	0	0	0	0	1	10	1	8140/3: Adenocarcinoma, NOS	Dead (attributable to this cancer dx)	Alive or dead due to cancer
31959880	1	3	2	T3	T3	3	N0	0	unknown	unknown	3	0	1	0	0	1	1	1	3	1	8140/3: Adenocarcinoma, NOS	Dead (attributable to this cancer dx)	Alive or dead due to cancer
31961789	1	3	1	T3	T3	3	N0	0	unknown	unknown	2	0	0	0	0	1	0	1	5	1	8140/3: Adenocarcinoma, NOS	Dead (attributable to this cancer dx)	Alive or dead due to cancer
31967737	2	3	2	T3	T3	3	N0	0	unknown	unknown	1	0	1	0	0	1	0	1	1	1	8140/3: Adenocarcinoma, NOS	Dead (attributable to this cancer dx)	Alive or dead due to cancer
32013493	1	3	1	T2	T3	3	N1	0	unknown	unknown	2	0	0	0	0	1	0	1	1	1	8140/3: Adenocarcinoma, NOS	Dead (missing/unknown COD)	Dead (missing/unknown COD)
32504931	1	3	1	T2	T2	2	N1	0	unknown	unknown	2	0	1	0	0	1	0	0	2	1	8140/3: Adenocarcinoma, NOS	N/A not first tumor	N/A not first tumor
32532722	2	3	2	T2	T2	2	N0	0	unknown	unknown	1	0	1	0	0	1	0	0	4	1	8140/3: Adenocarcinoma, NOS	N/A not first tumor	N/A not first tumor
33039659	2	3	2	T1	T1	1	N1	0	unknown	unknown	1	0	0	1	0	0	0	1	7	1	8140/3: Adenocarcinoma, NOS	N/A not first tumor	N/A not first tumor
33074658	2	3	1	T2	T3	3	N0	0	3	3	2	0	0	0	0	1	0	0	2	1	8010/3: Carcinoma, NOS	N/A not first tumor	N/A not first tumor
33405819	2	3	1	T3	T2	2	N0	0	unknown	unknown	2	0	1	0	0	1	0	1	15	1	8140/3: Adenocarcinoma, NOS	Dead (attributable to this cancer dx)	Alive or dead due to cancer
33411164	2	3	1	T3	T3	3	N0	0	unknown	unknown	2	0	0	0	0	1	0	0	2	1	8140/3: Adenocarcinoma, NOS	N/A not first tumor	N/A not first tumor
33465591	2	3	1	T3	T2	2	N1	0	unknown	unknown	1	0	1	0	0	0	0	0	2	1	8140/3: Adenocarcinoma, NOS	N/A not first tumor	N/A not first tumor
33501801	2	3	1	T4	T4	3	N0	0	unknown	unknown	3	0	1	0	0	1	1	0	2	1	8140/3: Adenocarcinoma, NOS	N/A not first tumor	N/A not first tumor
33514985	2	3	2	T1	T1	1	N0	1	2	2	3	0	0	0	0	1	0	1	80	0	8246/3: Neuroendocrine carcinoma, NOS	Alive or dead of other cause	Alive or dead due to cancer
33523900	1	3	2	T2	T2	2	N1	0	unknown	unknown	3	0	1	0	0	1	0	1	22	1	8046/3: Non-small cell carcinoma	Dead (attributable to this cancer dx)	Alive or dead due to cancer
33525170	2	3	1	T4	T4	3	N0	0	unknown	unknown	2	0	1	0	0	1	0	1	5	1	8140/3: Adenocarcinoma, NOS	Dead (attributable to this cancer dx)	Alive or dead due to cancer
33525700	2	3	2	T2	T3	3	N1	0	unknown	unknown	3	0	1	1	0	1	1	1	18	1	8140/3: Adenocarcinoma, NOS	Dead (attributable to this cancer dx)	Alive or dead due to cancer
33531783	2	3	2	T3	T2	2	N0	0	unknown	unknown	1	0	1	0	0	1	0	1	4	1	8480/3: Mucinous adenocarcinoma	Dead (attributable to this cancer dx)	Alive or dead due to cancer
33532627	1	3	1	T4	T4	2	N1	1	2	2	1	0	1	0	0	0	0	1	6	1	8140/3: Adenocarcinoma, NOS	Dead (attributable to this cancer dx)	Alive or dead due to cancer
33533714	2	3	1	T3	T3	3	N1	0	unknown	unknown	1	0	0	0	0	1	0	1	1	1	8140/3: Adenocarcinoma, NOS	Dead (attributable to this cancer dx)	Alive or dead due to cancer
33533903	2	3	2	T2	T2	2	N0	0	2	2	1	0	1	0	0	1	1	1	4	1	8140/3: Adenocarcinoma, NOS	Dead (attributable to this cancer dx)	Alive or dead due to cancer
33851580	2	3	1	T3	T3	3	N0	0	unknown	unknown	1	0	0	0	0	0	0	0	1	1	8140/3: Adenocarcinoma, NOS	N/A not first tumor	N/A not first tumor
33854260	1	3	2	T3	T3	3	N0	0	2	2	3	0	0	0	0	1	0	1	4	1	8140/3: Adenocarcinoma, NOS	Dead (missing/unknown COD)	Dead (missing/unknown COD)
33860884	1	3	1	T3	T3	3	N0	0	3	3	1	0	1	0	0	1	0	1	6	1	8140/3: Adenocarcinoma, NOS	Dead (attributable to this cancer dx)	Alive or dead due to cancer
33865025	1	3	1	T2	T3	3	N1	0	unknown	unknown	1	0	1	0	0	1	0	1	5	1	8041/3: Small cell carcinoma, NOS	Dead (attributable to this cancer dx)	Alive or dead due to cancer
33866515	2	3	1	T3	T3	3	N1	1	2	2	1	0	0	0	0	1	1	1	4	1	8500/3: Infiltrating duct carcinoma, NOS	Dead (attributable to this cancer dx)	Alive or dead due to cancer
33869413	2	3	1	T3	T2	2	N1	1	3	3	1	0	1	0	0	1	0	1	10	1	8140/3: Adenocarcinoma, NOS	Dead (attributable to this cancer dx)	Alive or dead due to cancer
33872072	1	3	1	T1	T1	1	N1	0	2	2	3	0	1	0	0	0	0	1	22	1	8481/3: Mucin-producing adenocarcinoma	Dead (attributable to this cancer dx)	Alive or dead due to cancer
33874496	2	3	2	T4	T4	3	N0	0	unknown	unknown	2	0	0	0	0	1	0	1	5	1	8140/3: Adenocarcinoma, NOS	Dead (attributable to this cancer dx)	Alive or dead due to cancer
33875499	2	3	2	T2	T3	3	N0	0	unknown	unknown	1	0	0	0	0	1	0	1	4	1	8140/3: Adenocarcinoma, NOS	Dead (attributable to this cancer dx)	Alive or dead due to cancer
33877305	2	3	2	T3	T3	3	N0	0	unknown	unknown	1	0	0	0	0	1	0	1	4	1	8140/3: Adenocarcinoma, NOS	Dead (attributable to this cancer dx)	Alive or dead due to cancer
33877734	1	3	1	T4	T4	3	N0	0	2	2	2	0	1	0	0	1	0	1	15	1	8140/3: Adenocarcinoma, NOS	Dead (attributable to this cancer dx)	Alive or dead due to cancer
33880099	2	3	1	T4	T4	3	N1	0	unknown	unknown	1	1	0	0	0	1	0	1	2	1	8140/3: Adenocarcinoma, NOS	Dead (attributable to this cancer dx)	Alive or dead due to cancer
33885649	2	3	1	T1	T1	1	N0	0	unknown	unknown	3	0	1	1	0	1	1	1	3	1	8246/3: Neuroendocrine carcinoma, NOS	Dead (attributable to this cancer dx)	Alive or dead due to cancer
33886503	2	3	1	T3	T2	2	N1	0	unknown	unknown	1	0	1	0	0	0	0	1	12	1	8140/3: Adenocarcinoma, NOS	Dead (attributable to this cancer dx)	Alive or dead due to cancer
33886618	2	3	1	T4	T4	3	N0	0	3	3	2	0	1	1	0	0	0	1	13	1	8140/3: Adenocarcinoma, NOS	Dead (attributable to this cancer dx)	Alive or dead due to cancer
33888440	1	3	2	T3	T3	3	N1	0	unknown	unknown	1	0	1	0	0	1	1	1	2	1	8140/3: Adenocarcinoma, NOS	Dead (attributable to this cancer dx)	Alive or dead due to cancer
33889007	2	3	2	T3	T3	3	N0	0	unknown	unknown	2	0	1	0	0	1	0	1	27	1	8140/3: Adenocarcinoma, NOS	Dead (attributable to this cancer dx)	Alive or dead due to cancer
33889118	2	3	1	T3	T2	2	N0	0	unknown	unknown	2	0	1	0	0	1	0	1	10	1	8140/3: Adenocarcinoma, NOS	Dead (attributable to this cancer dx)	Alive or dead due to cancer
33893065	2	3	2	T3	T2	2	N0	0	unknown	unknown	1	0	0	0	0	1	0	1	4	1	8140/3: Adenocarcinoma, NOS	Dead (attributable to this cancer dx)	Alive or dead due to cancer
33895206	2	3	1	T4	T4	3	N0	0	unknown	unknown	2	0	1	0	0	1	0	1	1	1	8140/3: Adenocarcinoma, NOS	Dead (attributable to this cancer dx)	Alive or dead due to cancer
33900148	1	3	1	T3	T3	3	N0	0	unknown	unknown	1	1	0	0	0	0	0	1	8	1	8140/3: Adenocarcinoma, NOS	Dead (attributable to this cancer dx)	Alive or dead due to cancer
33900698	2	3	2	T4	T4	3	N0	0	unknown	unknown	2	0	0	0	0	0	0	1	2	1	8140/3: Adenocarcinoma, NOS	Dead (attributable to this cancer dx)	Alive or dead due to cancer
33901138	1	3	1	T2	T3	3	N1	1	1	1	2	0	0	0	0	1	0	1	38	0	8246/3: Neuroendocrine carcinoma, NOS	Alive or dead of other cause	Alive or dead due to cancer
33903095	1	3	1	T2	T2	2	N0	0	unknown	unknown	2	0	1	0	0	0	0	1	19	1	8140/3: Adenocarcinoma, NOS	Dead (attributable to this cancer dx)	Alive or dead due to cancer
33905208	1	3	1	T3	T2	2	N1	1	3	3	2	0	1	0	0	1	0	1	13	1	8140/3: Adenocarcinoma, NOS	Dead (attributable to this cancer dx)	Alive or dead due to cancer
33906081	1	3	1	T2	T3	3	N0	0	unknown	unknown	3	0	0	0	0	1	0	1	2	1	8140/3: Adenocarcinoma, NOS	Dead (attributable to this cancer dx)	Alive or dead due to cancer
33907698	2	3	1	T4	T4	3	N0	0	unknown	unknown	3	0	1	0	0	1	0	1	4	1	8140/3: Adenocarcinoma, NOS	Dead (attributable to this cancer dx)	Alive or dead due to cancer
33908180	2	3	1	T2	T2	2	N0	0	unknown	unknown	1	0	0	0	0	1	0	1	1	1	8140/3: Adenocarcinoma, NOS	Dead (attributable to this cancer dx)	Alive or dead due to cancer
33909449	2	3	2	T2	T3	3	N1	0	unknown	unknown	2	0	1	0	0	0	0	1	2	1	8140/3: Adenocarcinoma, NOS	Dead (attributable to this cancer dx)	Alive or dead due to cancer
33915367	2	3	1	T2	T2	2	N1	1	2	2	1	0	0	0	0	1	0	1	31	0	8246/3: Neuroendocrine carcinoma, NOS	Alive or dead of other cause	Alive or dead due to cancer
33919504	2	3	1	T3	T2	2	N1	0	unknown	unknown	1	0	1	1	0	0	0	1	11	1	8140/3: Adenocarcinoma, NOS	Dead (attributable to this cancer dx)	Alive or dead due to cancer
33920655	2	3	2	T4	T4	2	N0	0	unknown	unknown	1	0	1	0	0	0	1	1	6	1	8140/3: Adenocarcinoma, NOS	Dead (attributable to this cancer dx)	Alive or dead due to cancer
33921882	2	3	1	T3	T2	2	N1	1	2	2	2	0	1	0	0	1	0	0	14	1	8500/3: Infiltrating duct carcinoma, NOS	N/A not first tumor	N/A not first tumor
33923279	2	3	2	T4	T4	3	N0	0	unknown	unknown	1	0	1	0	0	0	0	1	5	1	8140/3: Adenocarcinoma, NOS	Dead (attributable to this cancer dx)	Alive or dead due to cancer
33925843	2	3	2	T2	T2	2	N0	0	unknown	unknown	1	0	1	0	0	1	1	1	1	1	8140/3: Adenocarcinoma, NOS	Dead (attributable to this cancer dx)	Alive or dead due to cancer
33936176	1	3	2	T2	T2	2	N1	0	unknown	unknown	3	0	1	0	0	1	1	1	7	1	8140/3: Adenocarcinoma, NOS	Dead (attributable to this cancer dx)	Alive or dead due to cancer
33942951	2	3	2	T2	T2	2	N0	0	unknown	unknown	2	0	1	0	0	1	1	1	1	1	8140/3: Adenocarcinoma, NOS	Dead (attributable to this cancer dx)	Alive or dead due to cancer
33943908	2	3	1	T3	T2	2	N0	1	1	1	2	0	0	0	0	1	0	1	6	0	8240/3: Carcinoid tumor, NOS	Alive or dead of other cause	Alive or dead due to cancer
33946865	1	3	2	T3	T3	3	N0	0	2	2	1	0	1	0	0	1	0	1	13	0	8249/3: Atypical carcinoid tumor	Alive or dead of other cause	Alive or dead due to cancer
33949308	2	3	2	T2	T3	3	N0	0	unknown	unknown	3	0	1	0	0	1	0	1	10	0	8140/3: Adenocarcinoma, NOS	Alive or dead of other cause	Alive or dead due to cancer
34406657	2	3	2	T3	T2	2	N0	0	unknown	unknown	1	0	0	0	0	0	1	0	5	1	8140/3: Adenocarcinoma, NOS	N/A not first tumor	N/A not first tumor
34408265	2	3	2	T4	T4	3	N0	0	unknown	unknown	2	0	1	0	0	1	0	0	8	1	8490/3: Signet ring cell carcinoma	N/A not first tumor	N/A not first tumor
34474112	2	3	1	T3	T3	3	N0	0	unknown	unknown	3	0	0	0	0	0	0	0	1	1	8140/3: Adenocarcinoma, NOS	N/A not first tumor	N/A not first tumor
34550591	2	3	1	T3	T2	2	N1	1	3	3	1	0	1	0	0	1	0	0	24	1	8140/3: Adenocarcinoma, NOS	N/A not first tumor	N/A not first tumor
35599975	1	3	1	T3	T2	2	N1	0	3	3	1	0	1	0	0	1	0	0	2	1	8140/3: Adenocarcinoma, NOS	N/A not first tumor	N/A not first tumor
35626199	2	3	2	T2	T2	2	N1	0	3	3	1	0	0	0	0	1	0	1	2	1	8246/3: Neuroendocrine carcinoma, NOS	N/A not first tumor	N/A not first tumor
37195305	2	3	1	T3	T2	2	N0	0	unknown	unknown	3	0	1	0	0	1	0	0	9	1	8140/3: Adenocarcinoma, NOS	N/A not first tumor	N/A not first tumor
37751213	2	3	2	T4	T4	2	N1	1	2	2	1	0	0	0	0	0	0	0	7	1	8140/3: Adenocarcinoma, NOS	N/A not first tumor	N/A not first tumor
37806960	2	3	2	T3	T3	3	N0	0	2	2	3	0	1	0	0	0	1	0	18	1	8500/3: Infiltrating duct carcinoma, NOS	N/A not first tumor	N/A not first tumor
38227840	1	3	2	T3	T2	2	N1	1	2	2	2	0	0	0	0	1	0	0	30	1	8246/3: Neuroendocrine carcinoma, NOS	N/A not first tumor	N/A not first tumor
38336595	2	3	1	T4	T4	3	N0	0	2	2	3	1	1	0	0	0	0	0	10	1	8140/3: Adenocarcinoma, NOS	N/A not first tumor	N/A not first tumor
38374474	2	3	1	T2	T3	3	N0	0	3	3	2	0	0	0	0	1	1	0	1	1	8140/3: Adenocarcinoma, NOS	N/A not first tumor	N/A not first tumor
39342460	2	3	2	T3	T3	3	N1	0	3	3	1	0	0	0	0	0	0	0	4	1	8010/3: Carcinoma, NOS	N/A not first tumor	N/A not first tumor
39343759	2	3	1	T3	T2	2	N0	0	unknown	unknown	1	0	0	0	0	1	0	0	4	1	8140/3: Adenocarcinoma, NOS	N/A not first tumor	N/A not first tumor
39374599	2	3	2	T1	T1	1	N0	0	unknown	unknown	3	0	1	0	0	1	0	0	5	1	8140/3: Adenocarcinoma, NOS	N/A not first tumor	N/A not first tumor
39393931	2	3	2	T2	T2	2	N0	0	unknown	unknown	3	0	1	0	0	1	0	1	2	1	8140/3: Adenocarcinoma, NOS	Dead (attributable to this cancer dx)	Alive or dead due to cancer
39396131	2	3	2	T3	T2	2	N0	0	2	2	1	0	0	0	0	1	0	1	20	0	8140/3: Adenocarcinoma, NOS	Alive or dead of other cause	Alive or dead due to cancer
39401017	2	3	2	T4	T4	3	N1	0	3	3	2	0	1	0	0	1	0	1	5	1	8140/3: Adenocarcinoma, NOS	Dead (attributable to this cancer dx)	Alive or dead due to cancer
39401479	1	3	2	T2	T2	2	N0	0	unknown	unknown	2	0	0	0	0	1	0	1	1	1	8140/3: Adenocarcinoma, NOS	Dead (attributable to this cancer dx)	Alive or dead due to cancer
39412216	2	3	1	T3	T2	2	N0	0	unknown	unknown	2	0	1	0	0	1	0	1	4	1	8140/3: Adenocarcinoma, NOS	Dead (attributable to this cancer dx)	Alive or dead due to cancer
39419020	1	3	1	T3	T2	2	N0	1	3	3	1	0	1	0	0	1	0	1	9	1	8140/3: Adenocarcinoma, NOS	Dead (attributable to this cancer dx)	Alive or dead due to cancer
39419684	2	3	1	T2	T2	2	N0	0	3	3	1	0	1	0	0	1	0	0	5	1	8574/3: Adenocarcinoma with neuroendocrine differentiation	N/A not first tumor	N/A not first tumor
39435114	2	3	1	T1	T1	1	N1	0	2	2	1	0	1	0	0	1	1	1	7	1	8140/3: Adenocarcinoma, NOS	Dead (attributable to this cancer dx)	Alive or dead due to cancer
39436294	2	3	1	T2	T3	3	N0	0	unknown	unknown	2	0	0	0	0	1	0	1	1	1	8140/3: Adenocarcinoma, NOS	Dead (attributable to this cancer dx)	Alive or dead due to cancer
39449637	2	3	1	T2	T3	3	N0	0	3	3	3	0	0	0	0	1	0	1	5	1	8481/3: Mucin-producing adenocarcinoma	Dead (attributable to this cancer dx)	Alive or dead due to cancer
39467144	2	3	1	T3	T3	3	N0	0	unknown	unknown	3	0	1	0	0	1	0	1	6	1	8140/3: Adenocarcinoma, NOS	Dead (attributable to this cancer dx)	Alive or dead due to cancer
39875163	1	3	1	T3	T2	2	N0	0	1	1	1	1	1	0	0	1	0	1	26	1	8140/3: Adenocarcinoma, NOS	Dead (attributable to this cancer dx)	Alive or dead due to cancer
39887488	1	3	2	T2	T3	3	N0	0	unknown	unknown	3	0	0	0	0	1	1	1	4	1	8140/3: Adenocarcinoma, NOS	Dead (attributable to this cancer dx)	Alive or dead due to cancer
39891842	2	3	1	T2	T3	3	N0	0	3	3	1	0	0	0	0	1	0	1	1	1	8046/3: Non-small cell carcinoma	Dead (attributable to this cancer dx)	Alive or dead due to cancer
39892160	2	3	2	T3	T2	2	N0	1	3	3	1	0	0	0	0	1	0	1	4	1	8500/3: Infiltrating duct carcinoma, NOS	Dead (attributable to this cancer dx)	Alive or dead due to cancer
39895376	1	3	1	T2	T2	2	N0	0	3	3	1	0	0	0	0	1	0	1	2	1	8140/3: Adenocarcinoma, NOS	Dead (attributable to this cancer dx)	Alive or dead due to cancer
39896220	1	3	2	T3	T3	3	N1	0	2	2	3	0	1	0	0	0	0	1	5	1	8140/3: Adenocarcinoma, NOS	Dead (attributable to this cancer dx)	Alive or dead due to cancer
39908055	2	3	1	T3	T2	2	N0	0	unknown	unknown	3	0	1	0	0	1	0	1	6	1	8140/3: Adenocarcinoma, NOS	Dead (attributable to this cancer dx)	Alive or dead due to cancer
39908063	1	3	1	T2	T2	2	N0	0	unknown	unknown	3	0	0	0	0	1	0	1	7	1	8140/3: Adenocarcinoma, NOS	Dead (attributable to this cancer dx)	Alive or dead due to cancer
39908551	1	3	1	T2	T2	2	N1	0	unknown	unknown	2	0	0	0	0	1	0	1	2	1	8140/3: Adenocarcinoma, NOS	Dead (attributable to this cancer dx)	Alive or dead due to cancer
39910651	1	3	1	T2	T3	3	N0	0	unknown	unknown	2	0	1	0	0	1	0	1	1	1	8046/3: Non-small cell carcinoma	Dead (attributable to this cancer dx)	Alive or dead due to cancer
39914995	1	3	2	T2	T2	2	N0	0	unknown	unknown	2	0	0	1	0	1	1	1	2	1	8140/3: Adenocarcinoma, NOS	Dead (attributable to this cancer dx)	Alive or dead due to cancer
39921575	1	3	2	T3	T2	2	N1	0	unknown	unknown	1	0	0	0	0	0	0	1	1	1	8140/3: Adenocarcinoma, NOS	Dead (attributable to this cancer dx)	Alive or dead due to cancer
39925573	2	3	2	T3	T3	3	N1	0	2	2	3	0	0	0	0	0	1	1	1	0	8140/3: Adenocarcinoma, NOS	Alive or dead of other cause	Alive or dead due to cancer
39925786	2	3	2	T3	T3	3	N1	0	unknown	unknown	1	0	1	0	0	1	0	1	1	1	8140/3: Adenocarcinoma, NOS	Dead (attributable to this cancer dx)	Alive or dead due to cancer
39929168	1	3	1	T2	T3	3	N0	0	2	2	1	0	1	0	0	1	0	1	15	1	8140/3: Adenocarcinoma, NOS	Dead (attributable to this cancer dx)	Alive or dead due to cancer
39935669	2	3	1	T2	T2	2	N0	0	unknown	unknown	3	0	0	0	0	1	0	1	3	1	8140/3: Adenocarcinoma, NOS	Dead (attributable to this cancer dx)	Alive or dead due to cancer
39935674	2	3	1	T2	T2	2	N0	0	3	3	2	0	0	0	0	1	0	1	4	1	8140/3: Adenocarcinoma, NOS	Dead (attributable to this cancer dx)	Alive or dead due to cancer
39943654	1	3	1	T2	T3	3	N1	0	unknown	unknown	1	0	1	1	0	1	0	1	3	1	8140/3: Adenocarcinoma, NOS	Dead (attributable to this cancer dx)	Alive or dead due to cancer
39947847	2	3	2	T3	T3	3	N1	0	unknown	unknown	2	0	0	0	0	1	0	1	1	1	8140/3: Adenocarcinoma, NOS	Dead (attributable to this cancer dx)	Alive or dead due to cancer
39949277	2	3	1	T3	T3	3	N0	0	4	3	1	0	1	0	0	1	0	1	6	1	8480/3: Mucinous adenocarcinoma	Dead (attributable to this cancer dx)	Alive or dead due to cancer
39949286	2	3	1	T3	T2	2	N0	0	2	2	1	0	0	0	0	1	0	0	12	1	8140/3: Adenocarcinoma, NOS	N/A not first tumor	N/A not first tumor
39952191	1	3	2	T4	T4	3	N1	0	2	2	1	0	1	0	0	1	0	1	12	1	8140/3: Adenocarcinoma, NOS	Dead (attributable to this cancer dx)	Alive or dead due to cancer
39952340	2	3	1	T2	T3	3	N0	0	unknown	unknown	2	0	1	0	0	1	0	1	4	1	8010/3: Carcinoma, NOS	Dead (attributable to this cancer dx)	Alive or dead due to cancer
39955550	2	3	2	T4	T4	2	N1	0	unknown	unknown	2	0	1	0	0	1	1	1	4	1	8500/3: Infiltrating duct carcinoma, NOS	Dead (attributable to this cancer dx)	Alive or dead due to cancer
39957983	2	3	1	T2	T2	2	N0	0	unknown	unknown	1	0	0	0	0	1	0	1	1	1	8140/3: Adenocarcinoma, NOS	Dead (attributable to this cancer dx)	Alive or dead due to cancer
39965413	2	3	2	T2	T3	3	N0	0	3	3	3	0	1	0	0	1	0	1	1	1	8140/3: Adenocarcinoma, NOS	Dead (attributable to this cancer dx)	Alive or dead due to cancer
39969521	2	3	2	T1	T1	1	N0	0	unknown	unknown	2	0	1	0	0	1	0	1	1	1	8140/3: Adenocarcinoma, NOS	Dead (attributable to this cancer dx)	Alive or dead due to cancer
39971129	2	3	2	T4	T4	2	N0	0	2	2	1	0	0	0	0	1	1	1	2	1	8140/3: Adenocarcinoma, NOS	Dead (attributable to this cancer dx)	Alive or dead due to cancer
39986282	1	3	1	T4	T4	3	N0	0	4	3	1	0	1	0	0	1	0	1	47	0	8246/3: Neuroendocrine carcinoma, NOS	Alive or dead of other cause	Alive or dead due to cancer
39988704	1	3	1	T3	T3	3	N0	1	3	3	2	0	0	0	0	1	0	1	10	1	8550/3: Acinar cell carcinoma	Dead (attributable to this cancer dx)	Alive or dead due to cancer
39990874	2	3	2	T4	T4	1	N0	0	unknown	unknown	1	0	0	0	0	1	0	1	1	0	8140/3: Adenocarcinoma, NOS	Alive or dead of other cause	Alive or dead due to cancer
39992359	1	3	1	T2	T2	2	N0	1	2	2	1	0	0	0	0	1	0	1	47	0	8246/3: Neuroendocrine carcinoma, NOS	Alive or dead of other cause	Alive or dead due to cancer
39996954	2	3	2	T4	T4	2	N0	0	unknown	unknown	2	0	1	0	0	0	1	1	3	1	8140/3: Adenocarcinoma, NOS	Dead (attributable to this cancer dx)	Alive or dead due to cancer
39999374	2	3	1	T3	T2	2	N0	0	unknown	unknown	2	0	1	0	0	1	0	1	7	1	8140/3: Adenocarcinoma, NOS	Dead (attributable to this cancer dx)	Alive or dead due to cancer
40003587	2	3	2	T3	T2	2	N1	1	1	1	1	0	1	0	0	0	0	1	43	0	8500/3: Infiltrating duct carcinoma, NOS	Alive or dead of other cause	Alive or dead due to cancer
40008273	2	3	1	T3	T2	2	N0	0	1	1	2	0	1	0	0	1	0	0	13	1	8140/3: Adenocarcinoma, NOS	N/A not first tumor	N/A not first tumor
40011221	2	3	2	T2	T2	2	N0	0	unknown	unknown	2	0	1	0	0	1	0	1	13	1	8140/3: Adenocarcinoma, NOS	Dead (attributable to this cancer dx)	Alive or dead due to cancer
40013222	2	3	2	T1	T1	1	N0	0	2	2	1	0	1	0	0	0	1	1	20	1	8480/3: Mucinous adenocarcinoma	Dead (attributable to this cancer dx)	Alive or dead due to cancer
40028570	2	3	1	T2	T2	2	N0	0	unknown	unknown	3	0	0	0	0	1	0	1	4	1	8140/3: Adenocarcinoma, NOS	Dead (attributable to this cancer dx)	Alive or dead due to cancer
40414882	2	3	2	T4	T4	3	N0	1	2	2	2	0	1	0	0	0	0	1	9	1	8140/3: Adenocarcinoma, NOS	Dead (attributable to this cancer dx)	Alive or dead due to cancer
40419715	2	3	2	T1	T1	1	N1	0	unknown	unknown	3	0	1	0	0	1	0	1	1	1	8140/3: Adenocarcinoma, NOS	Dead (attributable to this cancer dx)	Alive or dead due to cancer
40425591	2	3	2	T3	T2	2	N0	0	unknown	unknown	1	0	1	0	0	1	0	1	8	1	8140/3: Adenocarcinoma, NOS	Dead (attributable to this cancer dx)	Alive or dead due to cancer
40426982	2	3	1	T2	T3	3	N1	0	unknown	unknown	2	0	1	0	0	1	0	1	2	1	8140/3: Adenocarcinoma, NOS	Dead (attributable to this cancer dx)	Alive or dead due to cancer
40431684	2	3	2	T2	T2	2	N0	0	unknown	unknown	3	0	1	0	0	1	0	1	2	1	8500/3: Infiltrating duct carcinoma, NOS	Dead (attributable to this cancer dx)	Alive or dead due to cancer
40432200	2	3	1	T2	T3	3	N0	0	3	3	3	0	1	1	0	1	0	1	5	1	8140/3: Adenocarcinoma, NOS	Dead (attributable to this cancer dx)	Alive or dead due to cancer
40433870	2	3	2	T3	T2	2	N0	0	3	3	2	1	1	0	0	1	0	1	3	1	8140/3: Adenocarcinoma, NOS	Dead (attributable to this cancer dx)	Alive or dead due to cancer
40442728	1	3	1	T4	T4	3	N1	0	1	1	2	0	1	0	0	1	0	1	13	1	8140/3: Adenocarcinoma, NOS	Dead (attributable to this cancer dx)	Alive or dead due to cancer
40443695	2	3	2	T4	T4	3	N0	0	unknown	unknown	1	0	1	0	0	1	0	1	5	1	8140/3: Adenocarcinoma, NOS	Dead (attributable to this cancer dx)	Alive or dead due to cancer
40443917	2	3	1	T4	T4	3	N1	0	unknown	unknown	3	0	0	0	0	1	0	1	1	1	8140/3: Adenocarcinoma, NOS	Dead (attributable to this cancer dx)	Alive or dead due to cancer
40448409	1	3	2	T2	T3	3	N0	0	unknown	unknown	1	1	1	0	0	1	0	1	2	1	8140/3: Adenocarcinoma, NOS	Dead (attributable to this cancer dx)	Alive or dead due to cancer
40450279	2	3	2	T3	T3	3	N0	0	1	1	3	0	0	0	0	1	1	1	1	1	8010/3: Carcinoma, NOS	Dead (attributable to this cancer dx)	Alive or dead due to cancer
40453394	2	3	2	T2	T3	3	N1	0	unknown	unknown	3	0	0	0	0	1	0	1	1	1	8140/3: Adenocarcinoma, NOS	Dead (attributable to this cancer dx)	Alive or dead due to cancer
40454618	2	3	2	T4	T4	2	N0	0	3	3	3	0	1	0	0	1	0	0	3	1	8500/3: Infiltrating duct carcinoma, NOS	N/A not first tumor	N/A not first tumor
40455118	1	3	2	T3	T3	3	N1	0	unknown	unknown	2	0	1	0	0	1	0	1	4	1	8140/3: Adenocarcinoma, NOS	Dead (attributable to this cancer dx)	Alive or dead due to cancer
40457779	1	3	1	T4	T4	3	N1	0	unknown	unknown	1	1	1	0	0	1	0	1	4	0	8240/3: Carcinoid tumor, NOS	Alive or dead of other cause	Alive or dead due to cancer
40461490	1	3	1	T2	T2	2	N0	0	2	2	3	0	1	0	0	1	0	1	28	1	8480/3: Mucinous adenocarcinoma	Dead (attributable to this cancer dx)	Alive or dead due to cancer
40462217	1	3	1	T3	T3	3	N0	0	unknown	unknown	2	0	1	0	0	1	0	1	2	1	8246/3: Neuroendocrine carcinoma, NOS	Dead (attributable to this cancer dx)	Alive or dead due to cancer
40467572	2	3	1	T2	T2	2	N0	0	unknown	unknown	1	0	1	0	0	1	0	1	1	1	8140/3: Adenocarcinoma, NOS	Dead (attributable to this cancer dx)	Alive or dead due to cancer
40468303	2	3	2	T4	T4	3	N1	0	unknown	unknown	2	0	1	0	0	1	0	1	19	1	8480/3: Mucinous adenocarcinoma	Dead (attributable to this cancer dx)	Alive or dead due to cancer
40469128	2	3	1	T3	T2	2	N0	0	unknown	unknown	3	0	1	0	0	1	0	1	6	1	8500/3: Infiltrating duct carcinoma, NOS	Dead (attributable to this cancer dx)	Alive or dead due to cancer
40483656	1	3	1	T3	T2	2	N0	0	3	3	1	0	0	1	0	1	0	1	2	1	8140/3: Adenocarcinoma, NOS	Dead (missing/unknown COD)	Dead (missing/unknown COD)
40491849	2	3	1	T2	T2	2	N0	0	1	1	1	0	0	0	0	1	1	1	1	1	8574/3: Adenocarcinoma with neuroendocrine differentiation	Dead (attributable to this cancer dx)	Alive or dead due to cancer
40496469	2	3	1	T2	T2	2	N0	0	unknown	unknown	1	0	0	0	0	1	0	1	1	1	8140/3: Adenocarcinoma, NOS	Dead (attributable to this cancer dx)	Alive or dead due to cancer
40523220	1	3	2	T2	T2	2	N0	0	unknown	unknown	2	0	0	0	0	0	1	1	1	1	8140/3: Adenocarcinoma, NOS	Dead (attributable to this cancer dx)	Alive or dead due to cancer
40523821	1	3	1	T3	T3	3	N1	0	unknown	unknown	1	0	1	0	0	1	1	1	19	1	8140/3: Adenocarcinoma, NOS	Dead (attributable to this cancer dx)	Alive or dead due to cancer
40525851	2	3	2	T2	T3	3	N0	0	unknown	unknown	3	0	0	0	0	1	0	1	1	1	8140/3: Adenocarcinoma, NOS	Dead (attributable to this cancer dx)	Alive or dead due to cancer
40525965	2	3	2	T4	T4	3	N0	0	unknown	unknown	2	0	1	0	0	1	0	1	5	1	8140/3: Adenocarcinoma, NOS	Dead (attributable to this cancer dx)	Alive or dead due to cancer
40536201	1	3	2	T3	T3	3	N1	0	1	1	1	0	1	0	0	0	1	1	8	1	8140/3: Adenocarcinoma, NOS	Dead (attributable to this cancer dx)	Alive or dead due to cancer
40541219	2	3	1	T2	T2	2	N0	0	unknown	unknown	2	1	1	1	0	1	0	1	1	1	8500/3: Infiltrating duct carcinoma, NOS	Dead (attributable to this cancer dx)	Alive or dead due to cancer
40546125	1	3	1	T3	T2	2	N1	0	unknown	unknown	1	0	1	0	0	0	1	1	12	1	8140/3: Adenocarcinoma, NOS	Dead (attributable to this cancer dx)	Alive or dead due to cancer
40552337	1	3	1	T2	T3	3	N1	0	unknown	unknown	1	0	1	0	0	1	0	1	5	1	8140/3: Adenocarcinoma, NOS	Dead (attributable to this cancer dx)	Alive or dead due to cancer
40555977	1	3	1	T3	T3	3	N0	0	unknown	unknown	1	0	1	0	0	1	0	1	9	1	8500/3: Infiltrating duct carcinoma, NOS	Dead (attributable to this cancer dx)	Alive or dead due to cancer
40559097	2	3	2	T3	T3	3	N1	0	unknown	unknown	3	0	1	0	0	0	0	1	7	1	8500/3: Infiltrating duct carcinoma, NOS	Dead (attributable to this cancer dx)	Alive or dead due to cancer
40561920	2	3	2	T4	T4	3	N1	0	3	3	1	0	1	0	0	1	0	1	1	1	8140/3: Adenocarcinoma, NOS	Dead (attributable to this cancer dx)	Alive or dead due to cancer
40563203	2	3	2	T3	T2	2	N0	0	unknown	unknown	2	0	1	0	0	1	0	1	15	0	8140/3: Adenocarcinoma, NOS	Alive or dead of other cause	Alive or dead due to cancer
40567277	2	3	2	T2	T2	2	N0	0	unknown	unknown	1	1	1	0	0	0	1	1	17	0	8140/3: Adenocarcinoma, NOS	Alive or dead of other cause	Alive or dead due to cancer
40956225	2	3	2	T4	T4	2	N0	0	unknown	unknown	2	0	0	0	0	1	0	1	3	1	8140/3: Adenocarcinoma, NOS	Dead (attributable to this cancer dx)	Alive or dead due to cancer
40957628	2	3	2	T3	T1	1	N1	0	unknown	unknown	3	1	0	0	0	1	0	1	5	1	8140/3: Adenocarcinoma, NOS	Dead (attributable to this cancer dx)	Alive or dead due to cancer
40964171	2	3	2	T4	T4	2	N0	0	unknown	unknown	1	1	1	0	0	1	0	1	10	1	8140/3: Adenocarcinoma, NOS	Dead (attributable to this cancer dx)	Alive or dead due to cancer
41009779	2	3	1	T2	T3	3	N0	0	unknown	unknown	3	0	1	0	0	1	0	1	19	1	8246/3: Neuroendocrine carcinoma, NOS	Dead (attributable to this cancer dx)	Alive or dead due to cancer
43297326	2	3	2	T3	T2	2	N1	0	3	3	1	0	1	0	0	1	0	1	6	1	8140/3: Adenocarcinoma, NOS	N/A not first tumor	N/A not first tumor
43847558	1	3	1	T3	T2	2	N0	0	unknown	unknown	1	0	1	0	0	1	0	0	15	1	8140/3: Adenocarcinoma, NOS	N/A not first tumor	N/A not first tumor
44505748	2	3	1	T4	T4	3	N0	0	3	3	2	1	1	0	0	0	1	0	5	1	8140/3: Adenocarcinoma, NOS	N/A not first tumor	N/A not first tumor
46019735	2	3	2	T3	T2	2	N1	0	unknown	unknown	1	0	1	0	0	0	0	0	11	1	8140/3: Adenocarcinoma, NOS	N/A not first tumor	N/A not first tumor
47205591	2	3	2	T4	T4	3	N1	0	unknown	unknown	2	0	1	0	0	1	0	0	3	1	8140/3: Adenocarcinoma, NOS	N/A not first tumor	N/A not first tumor
48875320	2	3	2	T3	T2	2	N1	1	2	2	1	0	1	0	0	0	0	0	36	0	8500/3: Infiltrating duct carcinoma, NOS	N/A not first tumor	N/A not first tumor
49857113	2	3	2	T2	T2	2	N0	0	unknown	unknown	2	0	1	0	0	1	1	0	5	1	8140/3: Adenocarcinoma, NOS	N/A not first tumor	N/A not first tumor
49905999	2	3	1	T2	T2	2	N0	0	unknown	unknown	2	0	0	0	0	1	0	0	2	1	8150/3: Pancreatic endocrine tumor, malignant	N/A not first tumor	N/A not first tumor
50426521	2	3	2	T4	T4	3	N0	0	unknown	unknown	3	0	1	0	0	1	0	0	58	0	8500/3: Infiltrating duct carcinoma, NOS	N/A not first tumor	N/A not first tumor
50984682	1	3	2	T3	T3	3	N0	0	3	3	2	0	1	0	0	1	0	0	24	1	8140/3: Adenocarcinoma, NOS	N/A not first tumor	N/A not first tumor
51509735	2	3	1	T3	T3	3	N1	0	unknown	unknown	2	0	0	0	0	1	0	0	11	1	8140/3: Adenocarcinoma, NOS	N/A not first tumor	N/A not first tumor
52147339	1	3	2	T2	T3	3	N0	0	unknown	unknown	3	0	1	0	0	1	1	0	3	1	8010/3: Carcinoma, NOS	N/A not first tumor	N/A not first tumor
52181640	2	3	2	T2	T3	3	N1	0	unknown	unknown	3	0	0	0	0	1	0	1	8	1	8140/3: Adenocarcinoma, NOS	Dead (missing/unknown COD)	Dead (missing/unknown COD)
52199769	2	3	2	T3	T2	2	N0	0	unknown	unknown	1	1	1	1	0	0	0	0	15	1	8140/3: Adenocarcinoma, NOS	N/A not first tumor	N/A not first tumor
52199966	2	3	2	T2	T2	2	N0	0	unknown	unknown	1	0	1	0	0	1	0	1	5	1	8140/3: Adenocarcinoma, NOS	Dead (attributable to this cancer dx)	Alive or dead due to cancer
52208835	2	3	2	T3	T3	3	N1	0	2	2	2	0	0	0	0	1	0	1	1	1	8140/3: Adenocarcinoma, NOS	Dead (attributable to this cancer dx)	Alive or dead due to cancer
52602776	2	3	1	T4	T4	2	N0	0	2	2	2	0	1	0	0	0	0	1	15	1	8140/3: Adenocarcinoma, NOS	Dead (attributable to this cancer dx)	Alive or dead due to cancer
52604780	2	3	2	T2	T3	3	N1	0	unknown	unknown	1	0	1	0	0	1	0	0	8	1	8140/3: Adenocarcinoma, NOS	N/A not first tumor	N/A not first tumor
52612208	2	3	1	T1	T1	1	N0	0	unknown	unknown	1	0	0	0	0	1	1	1	7	1	8140/3: Adenocarcinoma, NOS	Dead (missing/unknown COD)	Dead (missing/unknown COD)
52626855	2	3	1	T3	T2	2	N0	0	3	3	1	0	0	0	0	1	0	1	1	1	8140/3: Adenocarcinoma, NOS	Dead (attributable to this cancer dx)	Alive or dead due to cancer
52656185	1	3	1	T2	T2	2	N0	0	unknown	unknown	3	0	1	0	0	1	0	1	49	1	8246/3: Neuroendocrine carcinoma, NOS	Dead (attributable to this cancer dx)	Alive or dead due to cancer
52657489	2	3	1	T3	T3	3	N0	0	2	2	3	0	1	0	0	1	0	1	9	1	8140/3: Adenocarcinoma, NOS	Dead (attributable to this cancer dx)	Alive or dead due to cancer
52663069	2	3	2	T2	T3	3	N0	0	unknown	unknown	2	0	0	0	0	1	0	1	1	1	8140/3: Adenocarcinoma, NOS	Dead (attributable to this cancer dx)	Alive or dead due to cancer
52675749	2	3	1	T3	T3	3	N0	0	unknown	unknown	1	0	1	1	0	1	0	1	3	1	8140/3: Adenocarcinoma, NOS	Dead (attributable to this cancer dx)	Alive or dead due to cancer
52690697	2	3	1	T2	T3	3	N1	0	unknown	unknown	3	0	1	0	0	0	0	1	1	1	8140/3: Adenocarcinoma, NOS	Dead (attributable to this cancer dx)	Alive or dead due to cancer
52697219	2	3	2	T1	T1	1	N0	0	unknown	unknown	1	1	1	1	0	1	0	1	3	1	8140/3: Adenocarcinoma, NOS	Dead (attributable to this cancer dx)	Alive or dead due to cancer
52709662	1	3	1	T3	T2	2	N1	0	unknown	unknown	1	1	1	0	0	0	0	0	5	1	8140/3: Adenocarcinoma, NOS	N/A not first tumor	N/A not first tumor
52717252	1	3	1	T3	T3	3	N0	0	1	1	2	0	1	0	0	1	0	1	1	1	8140/3: Adenocarcinoma, NOS	Dead (attributable to this cancer dx)	Alive or dead due to cancer
52722165	2	3	2	T3	T3	3	N1	0	unknown	unknown	1	0	0	0	0	1	0	1	1	1	8140/3: Adenocarcinoma, NOS	Dead (attributable to this cancer dx)	Alive or dead due to cancer
52723691	2	3	2	T3	T2	2	N0	0	unknown	unknown	1	0	0	0	0	1	0	1	5	1	8140/3: Adenocarcinoma, NOS	Dead (attributable to this cancer dx)	Alive or dead due to cancer
52728301	1	3	2	T3	T2	2	N1	1	3	3	1	0	1	0	0	0	0	1	31	1	8140/3: Adenocarcinoma, NOS	Dead (attributable to this cancer dx)	Alive or dead due to cancer
52735193	1	3	2	T3	T2	2	N0	0	unknown	unknown	2	0	1	0	0	1	1	1	3	1	8140/3: Adenocarcinoma, NOS	Dead (attributable to this cancer dx)	Alive or dead due to cancer
52754735	2	3	2	T3	T3	3	N0	0	unknown	unknown	2	0	1	0	0	1	0	1	6	1	8140/3: Adenocarcinoma, NOS	Alive or dead of other cause	Dead (attributable to causes other than this cancer dx)
52764968	2	3	1	T2	T2	2	N0	0	unknown	unknown	1	0	0	0	0	1	0	1	2	1	8140/3: Adenocarcinoma, NOS	Dead (attributable to this cancer dx)	Alive or dead due to cancer
53161672	2	3	2	T2	T3	3	N0	0	unknown	unknown	2	0	1	0	0	1	1	1	3	1	8140/3: Adenocarcinoma, NOS	Dead (attributable to this cancer dx)	Alive or dead due to cancer
53173640	2	3	1	T3	T3	3	N1	1	2	2	1	1	1	0	0	0	0	1	57	1	8140/3: Adenocarcinoma, NOS	Dead (attributable to this cancer dx)	Alive or dead due to cancer
53178860	2	3	1	T3	T2	2	N0	0	2	2	1	1	0	0	0	1	0	0	1	1	8500/3: Infiltrating duct carcinoma, NOS	N/A not first tumor	N/A not first tumor
53180920	1	3	1	T2	T2	2	N1	0	unknown	unknown	2	0	1	0	0	0	0	1	10	1	8140/3: Adenocarcinoma, NOS	Dead (attributable to this cancer dx)	Alive or dead due to cancer
53186308	2	3	2	T4	T4	3	N0	0	unknown	unknown	1	0	1	0	0	1	0	1	2	1	8140/3: Adenocarcinoma, NOS	Dead (attributable to this cancer dx)	Alive or dead due to cancer
53191474	1	3	1	T4	T4	3	N1	0	unknown	unknown	2	0	1	0	0	1	0	1	17	1	8140/3: Adenocarcinoma, NOS	Dead (attributable to this cancer dx)	Alive or dead due to cancer
53191486	2	3	2	T2	T2	2	N0	0	unknown	unknown	3	0	1	0	0	1	0	1	63	0	8140/3: Adenocarcinoma, NOS	Alive or dead of other cause	Alive or dead due to cancer
53196141	2	3	2	T2	T3	3	N0	0	unknown	unknown	1	0	1	0	0	0	0	1	15	1	8140/3: Adenocarcinoma, NOS	Dead (attributable to this cancer dx)	Alive or dead due to cancer
53213594	2	3	1	T2	T2	2	N0	0	unknown	unknown	2	0	1	0	0	1	0	1	7	1	8140/3: Adenocarcinoma, NOS	Dead (attributable to this cancer dx)	Alive or dead due to cancer
53230291	2	3	1	T2	T3	3	N0	0	unknown	unknown	2	0	1	0	0	1	0	1	8	1	8140/3: Adenocarcinoma, NOS	Dead (attributable to this cancer dx)	Alive or dead due to cancer
53233935	2	3	1	T2	T3	3	N0	0	unknown	unknown	1	0	1	0	0	1	0	1	6	1	8140/3: Adenocarcinoma, NOS	Dead (attributable to this cancer dx)	Alive or dead due to cancer
53243986	2	3	1	T3	T2	2	N0	0	unknown	unknown	2	1	1	0	0	0	0	1	10	1	8140/3: Adenocarcinoma, NOS	Dead (attributable to this cancer dx)	Alive or dead due to cancer
53250190	1	3	1	T3	T3	3	N0	0	unknown	unknown	2	0	1	0	0	1	0	1	3	1	8140/3: Adenocarcinoma, NOS	Dead (attributable to this cancer dx)	Alive or dead due to cancer
53264986	2	3	1	T2	T2	2	N0	0	unknown	unknown	3	0	1	0	0	1	0	1	18	1	8140/3: Adenocarcinoma, NOS	Dead (attributable to this cancer dx)	Alive or dead due to cancer
53265166	2	3	2	T4	T4	3	N1	0	unknown	unknown	3	0	0	1	0	1	0	1	3	1	8140/3: Adenocarcinoma, NOS	Dead (attributable to this cancer dx)	Alive or dead due to cancer
53281873	2	3	1	T2	T3	3	N0	0	2	2	2	0	1	0	0	1	0	1	15	1	8140/3: Adenocarcinoma, NOS	Dead (attributable to this cancer dx)	Alive or dead due to cancer
53286888	2	3	1	T3	T2	2	N1	0	unknown	unknown	1	0	1	0	0	1	0	1	2	1	8140/3: Adenocarcinoma, NOS	Dead (attributable to this cancer dx)	Alive or dead due to cancer
53287550	1	3	1	T3	T3	3	N0	0	3	3	2	0	1	0	0	1	0	1	37	1	8246/3: Neuroendocrine carcinoma, NOS	Dead (attributable to this cancer dx)	Alive or dead due to cancer
53292439	2	3	1	T2	T2	2	N0	0	unknown	unknown	2	0	1	0	0	0	0	1	21	1	8140/3: Adenocarcinoma, NOS	Dead (attributable to this cancer dx)	Alive or dead due to cancer
53301919	2	3	2	T2	T2	2	N1	0	unknown	unknown	2	0	1	0	0	0	1	1	9	1	8246/3: Neuroendocrine carcinoma, NOS	Dead (attributable to this cancer dx)	Alive or dead due to cancer
53302829	1	3	1	T2	T3	3	N0	0	2	2	2	0	1	0	0	1	0	1	38	1	8140/3: Adenocarcinoma, NOS	Dead (attributable to this cancer dx)	Alive or dead due to cancer
53313333	2	3	2	T3	T3	3	N0	0	unknown	unknown	1	0	1	0	0	1	0	1	9	1	8010/3: Carcinoma, NOS	Dead (missing/unknown COD)	Dead (missing/unknown COD)
53314236	2	3	1	T3	T2	2	N1	0	unknown	unknown	1	0	1	0	0	0	0	1	15	1	8480/3: Mucinous adenocarcinoma	Dead (attributable to this cancer dx)	Alive or dead due to cancer
53707562	2	3	2	T2	T3	3	N0	0	unknown	unknown	1	0	1	0	0	1	1	1	1	0	8140/3: Adenocarcinoma, NOS	Alive or dead of other cause	Alive or dead due to cancer
53707577	2	3	2	T2	T2	2	N1	0	2	2	1	0	0	0	0	1	0	1	2	1	8140/3: Adenocarcinoma, NOS	Dead (attributable to this cancer dx)	Alive or dead due to cancer
53711288	2	3	1	T2	T2	2	N0	0	3	3	1	0	0	0	0	1	0	1	5	1	8246/3: Neuroendocrine carcinoma, NOS	Dead (attributable to this cancer dx)	Alive or dead due to cancer
53711956	2	3	1	T4	T4	3	N1	0	unknown	unknown	2	0	1	0	0	1	1	1	2	1	8140/3: Adenocarcinoma, NOS	Dead (attributable to this cancer dx)	Alive or dead due to cancer
53713724	1	3	2	T3	T3	3	N1	0	3	3	3	0	0	0	0	1	0	1	4	1	8140/3: Adenocarcinoma, NOS	Dead (attributable to this cancer dx)	Alive or dead due to cancer
53716029	2	3	1	T2	T2	2	N1	1	3	3	1	0	1	0	0	1	0	1	30	1	8246/3: Neuroendocrine carcinoma, NOS	Dead (attributable to this cancer dx)	Alive or dead due to cancer
53716515	2	3	1	T2	T2	2	N0	0	unknown	unknown	2	0	1	0	0	0	0	1	6	1	8140/3: Adenocarcinoma, NOS	Dead (missing/unknown COD)	Dead (missing/unknown COD)
53724154	1	3	2	T2	T2	2	N1	0	unknown	unknown	2	0	1	0	0	1	0	1	3	1	8140/3: Adenocarcinoma, NOS	Dead (attributable to this cancer dx)	Alive or dead due to cancer
53725211	2	3	1	T4	T4	3	N0	1	2	2	1	0	1	0	0	0	0	1	4	1	8140/3: Adenocarcinoma, NOS	Dead (attributable to this cancer dx)	Alive or dead due to cancer
53730656	1	3	1	T3	T1	1	N1	1	1	1	1	0	0	1	0	0	0	1	10	1	8140/3: Adenocarcinoma, NOS	Dead (attributable to this cancer dx)	Alive or dead due to cancer
53734632	1	3	1	T2	T3	3	N1	0	4	3	3	0	1	0	0	1	0	1	11	1	8246/3: Neuroendocrine carcinoma, NOS	Dead (attributable to this cancer dx)	Alive or dead due to cancer
53734834	2	3	2	T1	T1	1	N0	0	2	2	2	0	0	0	0	0	0	1	22	1	8140/3: Adenocarcinoma, NOS	Dead (attributable to this cancer dx)	Alive or dead due to cancer
53740731	1	3	1	T2	T2	2	N0	0	unknown	unknown	1	0	1	0	0	1	0	1	13	1	8140/3: Adenocarcinoma, NOS	Dead (attributable to this cancer dx)	Alive or dead due to cancer
53743338	1	3	1	T3	T3	3	N1	1	2	2	2	0	0	0	0	1	0	1	17	0	8246/3: Neuroendocrine carcinoma, NOS	Alive or dead of other cause	Alive or dead due to cancer
53750635	2	3	2	T1	T1	1	N0	0	unknown	unknown	1	0	1	0	0	0	0	1	16	1	8140/3: Adenocarcinoma, NOS	Dead (attributable to this cancer dx)	Alive or dead due to cancer
53756225	2	3	2	T2	T2	2	N1	0	unknown	unknown	1	0	1	0	0	1	1	1	5	1	8140/3: Adenocarcinoma, NOS	Dead (attributable to this cancer dx)	Alive or dead due to cancer
53757941	2	3	1	T4	T4	3	N1	0	unknown	unknown	1	0	0	0	0	1	0	0	7	1	8140/3: Adenocarcinoma, NOS	N/A not first tumor	N/A not first tumor
53762687	2	3	1	T3	T3	3	N0	0	3	3	1	0	1	0	0	0	0	1	7	1	8140/3: Adenocarcinoma, NOS	Dead (attributable to this cancer dx)	Alive or dead due to cancer
53763940	1	3	2	T3	T2	2	N1	1	3	3	1	0	0	0	0	1	0	1	8	1	8013/3: Large cell neuroendocrine carcinoma	Dead (attributable to this cancer dx)	Alive or dead due to cancer
53765943	2	3	1	T2	T3	3	N0	0	unknown	unknown	1	1	1	0	0	0	1	1	50	0	8480/3: Mucinous adenocarcinoma	Alive or dead of other cause	Alive or dead due to cancer
53770480	1	3	2	T4	T4	3	N1	0	unknown	unknown	2	0	0	0	0	1	0	1	1	1	8140/3: Adenocarcinoma, NOS	Dead (attributable to this cancer dx)	Alive or dead due to cancer
53771850	1	3	1	T4	T4	2	N1	0	unknown	unknown	1	0	1	0	0	1	0	1	4	1	8140/3: Adenocarcinoma, NOS	Dead (attributable to this cancer dx)	Alive or dead due to cancer
53790218	2	3	2	T3	T2	2	N0	0	unknown	unknown	1	0	0	0	0	0	0	1	4	1	8140/3: Adenocarcinoma, NOS	Dead (attributable to this cancer dx)	Alive or dead due to cancer
53802732	2	3	2	T2	T3	3	N1	0	3	3	2	0	0	0	0	1	1	1	1	1	8140/3: Adenocarcinoma, NOS	Dead (attributable to this cancer dx)	Alive or dead due to cancer
53804882	2	3	2	T2	T3	3	N0	0	unknown	unknown	2	1	1	1	0	0	1	1	11	1	8140/3: Adenocarcinoma, NOS	Dead (attributable to this cancer dx)	Alive or dead due to cancer
53807652	2	3	1	T3	T3	3	N1	0	unknown	unknown	3	0	1	0	0	1	0	1	1	1	8560/3: Adenosquamous carcinoma	Dead (attributable to this cancer dx)	Alive or dead due to cancer
53814866	2	3	1	T3	T2	2	N1	1	2	2	2	0	0	0	0	1	0	1	15	1	8500/3: Infiltrating duct carcinoma, NOS	Dead (attributable to this cancer dx)	Alive or dead due to cancer
53821281	1	3	1	T2	T2	2	N0	0	3	3	1	0	1	0	0	1	0	1	2	1	8140/3: Adenocarcinoma, NOS	Dead (attributable to this cancer dx)	Alive or dead due to cancer
53836095	1	3	1	T4	T4	3	N1	0	1	1	3	0	1	0	0	1	0	1	16	1	8240/3: Carcinoid tumor, NOS	Dead (attributable to this cancer dx)	Alive or dead due to cancer
53847508	1	3	1	T3	T2	2	N1	0	unknown	unknown	1	1	1	0	0	1	0	1	7	1	8140/3: Adenocarcinoma, NOS	Dead (attributable to this cancer dx)	Alive or dead due to cancer
53849747	2	3	1	T2	T3	3	N1	0	3	3	1	0	0	0	0	1	1	0	2	1	8140/3: Adenocarcinoma, NOS	N/A not first tumor	N/A not first tumor
53853009	1	3	2	T3	T3	3	N1	1	2	2	2	0	1	0	0	1	0	1	45	0	8246/3: Neuroendocrine carcinoma, NOS	Alive or dead of other cause	Alive or dead due to cancer
53858655	2	3	1	T3	T3	3	N1	1	4	3	2	0	0	0	0	1	0	1	5	1	8140/3: Adenocarcinoma, NOS	Dead (attributable to this cancer dx)	Alive or dead due to cancer
53867508	2	3	2	T2	T2	2	N0	0	unknown	unknown	1	0	1	0	0	1	0	1	9	1	8140/3: Adenocarcinoma, NOS	Dead (attributable to this cancer dx)	Alive or dead due to cancer
54262174	2	3	1	T3	T2	2	N1	0	3	3	3	0	1	0	0	0	1	1	6	1	8140/3: Adenocarcinoma, NOS	Dead (attributable to this cancer dx)	Alive or dead due to cancer
54266531	2	3	1	T4	T4	3	N1	0	3	3	2	0	1	0	0	1	0	1	1	1	8140/3: Adenocarcinoma, NOS	Dead (attributable to this cancer dx)	Alive or dead due to cancer
54285093	2	3	2	T2	T2	2	N0	0	unknown	unknown	1	0	1	1	0	1	0	1	2	1	8140/3: Adenocarcinoma, NOS	Dead (attributable to this cancer dx)	Alive or dead due to cancer
54296936	2	3	1	T3	T3	3	N0	0	unknown	unknown	3	0	1	0	0	1	0	1	2	1	8140/3: Adenocarcinoma, NOS	Dead (attributable to this cancer dx)	Alive or dead due to cancer
54307734	2	3	1	T3	T3	3	N0	0	2	2	1	0	1	0	0	1	0	1	7	1	8140/3: Adenocarcinoma, NOS	Dead (attributable to this cancer dx)	Alive or dead due to cancer
54309995	2	3	2	T2	T2	2	N0	0	unknown	unknown	1	0	1	0	0	1	0	1	19	1	8140/3: Adenocarcinoma, NOS	Dead (attributable to this cancer dx)	Alive or dead due to cancer
54320585	2	3	2	T2	T3	3	N1	0	unknown	unknown	1	0	1	0	0	1	0	1	1	1	8140/3: Adenocarcinoma, NOS	Dead (attributable to this cancer dx)	Alive or dead due to cancer
54321149	2	3	1	T2	T2	2	N1	0	unknown	unknown	2	0	0	0	0	1	0	1	3	1	8140/3: Adenocarcinoma, NOS	Dead (attributable to this cancer dx)	Alive or dead due to cancer
54330650	2	3	2	T3	T3	3	N0	0	2	2	2	0	0	0	0	1	0	1	1	1	8140/3: Adenocarcinoma, NOS	Dead (attributable to this cancer dx)	Alive or dead due to cancer
54330812	2	3	1	T3	T3	3	N0	0	unknown	unknown	3	0	0	0	0	0	1	0	1	1	8140/3: Adenocarcinoma, NOS	N/A not first tumor	N/A not first tumor
54336939	1	3	1	T4	T4	3	N0	0	unknown	unknown	1	0	1	0	0	1	0	1	16	1	8140/3: Adenocarcinoma, NOS	Dead (attributable to this cancer dx)	Alive or dead due to cancer
54337795	2	3	1	T3	T2	2	N1	0	2	2	2	0	1	0	0	0	1	1	7	1	8140/3: Adenocarcinoma, NOS	Dead (attributable to this cancer dx)	Alive or dead due to cancer
54340692	2	3	2	T2	T2	2	N1	0	unknown	unknown	2	0	1	1	0	1	1	1	7	1	8140/3: Adenocarcinoma, NOS	Dead (attributable to this cancer dx)	Alive or dead due to cancer
54352606	2	3	1	T4	T4	3	N1	0	unknown	unknown	3	0	1	0	0	0	0	1	8	1	8010/3: Carcinoma, NOS	Dead (attributable to this cancer dx)	Alive or dead due to cancer
54352797	2	3	2	T4	T4	3	N0	0	4	3	1	0	1	0	0	1	0	1	12	1	8500/3: Infiltrating duct carcinoma, NOS	Dead (attributable to this cancer dx)	Alive or dead due to cancer
54358542	1	3	1	T2	T3	3	N0	0	unknown	unknown	2	0	0	0	0	1	0	1	31	1	8480/3: Mucinous adenocarcinoma	Dead (attributable to this cancer dx)	Alive or dead due to cancer
54360749	2	3	1	T1	T1	1	N0	0	3	3	2	0	0	0	0	0	0	1	2	1	8140/3: Adenocarcinoma, NOS	Dead (attributable to this cancer dx)	Alive or dead due to cancer
54360786	2	3	2	T3	T3	3	N1	0	unknown	unknown	3	0	1	0	0	1	0	1	1	1	8140/3: Adenocarcinoma, NOS	Dead (attributable to this cancer dx)	Alive or dead due to cancer
54362322	1	3	1	T2	T2	2	N0	0	unknown	unknown	2	0	1	0	0	0	0	0	33	0	8140/3: Adenocarcinoma, NOS	N/A not first tumor	N/A not first tumor
54369297	1	3	1	T3	T3	3	N1	0	unknown	unknown	1	0	1	0	0	0	0	1	8	1	8140/3: Adenocarcinoma, NOS	Dead (attributable to this cancer dx)	Alive or dead due to cancer
54373109	1	3	1	T4	T4	3	N1	0	unknown	unknown	1	0	1	0	0	1	0	1	10	1	8140/3: Adenocarcinoma, NOS	Dead (attributable to this cancer dx)	Alive or dead due to cancer
54389120	2	3	2	T2	T3	3	N0	0	unknown	unknown	1	0	1	0	0	0	1	1	11	1	8140/3: Adenocarcinoma, NOS	Dead (attributable to this cancer dx)	Alive or dead due to cancer
54395042	2	3	2	T2	T3	3	N1	0	2	2	1	0	0	0	0	1	0	1	1	1	8140/3: Adenocarcinoma, NOS	Dead (attributable to this cancer dx)	Alive or dead due to cancer
54402378	2	3	2	T2	T2	2	N0	0	unknown	unknown	3	0	0	1	0	1	1	1	2	1	8140/3: Adenocarcinoma, NOS	Dead (attributable to this cancer dx)	Alive or dead due to cancer
54408641	1	3	2	T3	T2	2	N1	1	4	3	2	0	1	0	0	1	0	1	32	0	8240/3: Carcinoid tumor, NOS	Alive or dead of other cause	Alive or dead due to cancer
54415547	1	3	1	T3	T2	2	N1	1	2	2	2	0	0	0	0	1	0	1	32	0	8249/3: Atypical carcinoid tumor	Alive or dead of other cause	Alive or dead due to cancer
54416843	2	3	2	T2	T2	2	N0	0	2	2	3	0	1	0	0	1	0	1	4	1	8500/3: Infiltrating duct carcinoma, NOS	Dead (attributable to this cancer dx)	Alive or dead due to cancer
54802307	2	3	2	T3	T2	2	N0	0	unknown	unknown	3	0	1	0	0	1	0	1	4	1	8140/3: Adenocarcinoma, NOS	Dead (attributable to this cancer dx)	Alive or dead due to cancer
54804995	1	3	1	T2	T2	2	N0	0	unknown	unknown	2	0	1	0	0	1	0	1	15	1	8246/3: Neuroendocrine carcinoma, NOS	Dead (attributable to this cancer dx)	Alive or dead due to cancer
54812744	1	3	2	T2	T2	2	N0	0	unknown	unknown	2	0	1	0	0	0	0	1	23	1	8490/3: Signet ring cell carcinoma	Dead (attributable to this cancer dx)	Alive or dead due to cancer
54829617	2	3	1	T2	T3	3	N1	0	unknown	unknown	2	0	1	0	0	1	0	1	7	1	8140/3: Adenocarcinoma, NOS	Dead (attributable to this cancer dx)	Alive or dead due to cancer
54842403	2	3	2	T2	T2	2	N0	0	unknown	unknown	2	0	0	0	0	1	0	1	11	1	8140/3: Adenocarcinoma, NOS	Dead (attributable to this cancer dx)	Alive or dead due to cancer
54857894	2	3	2	T2	T2	2	N0	0	unknown	unknown	1	0	1	0	0	1	0	1	18	1	8246/3: Neuroendocrine carcinoma, NOS	Dead (attributable to this cancer dx)	Alive or dead due to cancer
54858343	1	3	2	T2	T2	2	N0	0	unknown	unknown	2	1	1	0	0	1	0	1	16	1	8140/3: Adenocarcinoma, NOS	Dead (attributable to this cancer dx)	Alive or dead due to cancer
54867118	2	3	1	T3	T3	3	N1	0	2	2	1	0	1	0	0	1	0	1	16	1	8140/3: Adenocarcinoma, NOS	Dead (attributable to this cancer dx)	Alive or dead due to cancer
54869536	2	3	1	T2	T3	3	N1	0	unknown	unknown	1	0	1	0	0	0	0	1	2	1	8140/3: Adenocarcinoma, NOS	Dead (attributable to this cancer dx)	Alive or dead due to cancer
54871883	1	3	1	T2	T2	2	N1	0	unknown	unknown	1	0	0	0	0	1	0	1	3	1	8480/3: Mucinous adenocarcinoma	Dead (attributable to this cancer dx)	Alive or dead due to cancer
54881482	2	3	1	T4	T4	3	N1	0	unknown	unknown	2	0	0	0	0	1	0	1	1	1	8140/3: Adenocarcinoma, NOS	Dead (attributable to this cancer dx)	Alive or dead due to cancer
54882616	2	3	2	T4	T4	2	N1	0	unknown	unknown	2	0	1	0	0	0	1	1	5	1	8140/3: Adenocarcinoma, NOS	Dead (attributable to this cancer dx)	Alive or dead due to cancer
54888230	2	3	2	T3	T2	2	N0	0	3	3	1	0	0	0	0	1	0	1	2	1	8140/3: Adenocarcinoma, NOS	Dead (attributable to this cancer dx)	Alive or dead due to cancer
54895046	2	3	2	T2	T3	3	N0	0	unknown	unknown	1	0	0	0	0	1	0	1	4	1	8480/3: Mucinous adenocarcinoma	Dead (attributable to this cancer dx)	Alive or dead due to cancer
54898001	2	3	2	T4	T4	2	N1	0	2	2	1	0	0	0	0	1	0	1	4	1	8140/3: Adenocarcinoma, NOS	Dead (missing/unknown COD)	Dead (missing/unknown COD)
54902055	2	3	2	T4	T4	2	N0	1	unknown	unknown	1	0	1	0	0	1	0	1	13	1	8140/3: Adenocarcinoma, NOS	Dead (attributable to this cancer dx)	Alive or dead due to cancer
54904627	1	3	2	T3	T3	3	N1	0	2	2	3	0	1	0	0	1	0	1	13	1	8140/3: Adenocarcinoma, NOS	Dead (attributable to this cancer dx)	Alive or dead due to cancer
54905050	2	3	1	T3	T3	3	N1	0	2	2	2	0	0	0	0	0	0	1	7	1	8140/3: Adenocarcinoma, NOS	Dead (attributable to this cancer dx)	Alive or dead due to cancer
54930216	2	3	1	T3	T3	3	N0	0	4	3	2	1	1	1	0	1	0	1	22	0	8140/3: Adenocarcinoma, NOS	Alive or dead of other cause	Alive or dead due to cancer
54938142	2	3	1	T2	T3	3	N0	1	unknown	unknown	1	0	0	0	0	1	0	1	15	1	8140/3: Adenocarcinoma, NOS	Dead (attributable to this cancer dx)	Alive or dead due to cancer
54938602	1	3	1	T3	T1	1	N0	1	2	2	2	0	1	0	0	1	1	1	9	1	8480/3: Mucinous adenocarcinoma	Dead (attributable to this cancer dx)	Alive or dead due to cancer
54946748	1	3	2	T3	T2	2	N0	0	2	2	1	0	1	0	0	1	0	1	8	1	8140/3: Adenocarcinoma, NOS	Dead (attributable to this cancer dx)	Alive or dead due to cancer
54963788	2	3	2	T4	T4	3	N0	0	unknown	unknown	3	0	0	0	0	0	0	1	1	1	8140/3: Adenocarcinoma, NOS	Dead (attributable to this cancer dx)	Alive or dead due to cancer
54965701	1	3	2	T4	T4	3	N0	0	1	1	3	0	1	0	0	1	0	1	47	0	8246/3: Neuroendocrine carcinoma, NOS	Alive or dead of other cause	Alive or dead due to cancer
54967944	2	3	2	T2	T2	2	N0	0	unknown	unknown	1	0	1	0	0	1	1	1	9	1	8480/3: Mucinous adenocarcinoma	Dead (attributable to this cancer dx)	Alive or dead due to cancer
54971412	2	3	2	T3	T3	3	N1	0	3	3	2	0	0	0	0	0	1	1	14	1	8140/3: Adenocarcinoma, NOS	Dead (attributable to this cancer dx)	Alive or dead due to cancer
55350687	1	3	2	T3	T3	3	N0	0	unknown	unknown	2	0	1	0	0	1	0	1	9	1	8140/3: Adenocarcinoma, NOS	Dead (attributable to this cancer dx)	Alive or dead due to cancer
55352483	2	3	1	T2	T3	3	N0	0	unknown	unknown	2	0	1	0	0	1	0	1	3	1	8140/3: Adenocarcinoma, NOS	Dead (attributable to this cancer dx)	Alive or dead due to cancer
55359227	1	3	1	T4	T4	3	N0	0	3	3	2	1	1	0	0	0	0	1	10	1	8140/3: Adenocarcinoma, NOS	Dead (attributable to this cancer dx)	Alive or dead due to cancer
55364781	1	3	2	T2	T3	3	N0	0	unknown	unknown	3	0	1	0	0	1	1	1	11	1	8140/3: Adenocarcinoma, NOS	Dead (attributable to this cancer dx)	Alive or dead due to cancer
55373836	2	3	1	T4	T4	2	N0	0	unknown	unknown	3	0	0	0	0	1	0	1	1	1	8140/3: Adenocarcinoma, NOS	Dead (attributable to this cancer dx)	Alive or dead due to cancer
55381416	2	3	1	T4	T4	3	N0	0	unknown	unknown	2	0	1	1	0	1	1	1	15	1	8140/3: Adenocarcinoma, NOS	Dead (attributable to this cancer dx)	Alive or dead due to cancer
55384062	2	3	2	T2	T3	3	N0	0	unknown	unknown	3	0	0	0	0	1	0	1	1	1	8140/3: Adenocarcinoma, NOS	Dead (attributable to this cancer dx)	Alive or dead due to cancer
55391838	2	3	1	T2	T3	3	N1	0	unknown	unknown	2	0	1	0	0	1	1	1	4	1	8140/3: Adenocarcinoma, NOS	Dead (attributable to this cancer dx)	Alive or dead due to cancer
55391884	2	3	2	T3	T3	3	N1	0	3	3	3	0	0	0	0	1	1	1	3	1	8481/3: Mucin-producing adenocarcinoma	Dead (attributable to this cancer dx)	Alive or dead due to cancer
55395093	1	3	2	T2	T2	2	N0	0	unknown	unknown	2	0	0	0	0	1	1	1	4	1	8140/3: Adenocarcinoma, NOS	Dead (attributable to this cancer dx)	Alive or dead due to cancer
55396615	2	3	2	T3	T2	2	N1	1	2	2	1	0	1	0	0	1	0	1	20	0	8500/3: Infiltrating duct carcinoma, NOS	Alive or dead of other cause	Alive or dead due to cancer
55400877	2	3	2	T3	T3	3	N1	0	2	2	3	0	1	1	0	1	1	1	2	1	8140/3: Adenocarcinoma, NOS	Dead (attributable to this cancer dx)	Alive or dead due to cancer
55403809	2	3	1	T2	T2	2	N0	0	unknown	unknown	1	0	0	0	0	0	1	1	17	0	8140/3: Adenocarcinoma, NOS	Alive or dead of other cause	Alive or dead due to cancer
55418088	1	3	2	T4	T4	2	N1	0	unknown	unknown	3	0	1	1	0	1	0	1	2	1	8140/3: Adenocarcinoma, NOS	Dead (attributable to this cancer dx)	Alive or dead due to cancer
55419719	1	3	2	T2	T3	3	N0	0	unknown	unknown	2	0	1	0	0	1	0	1	4	0	8140/3: Adenocarcinoma, NOS	Alive or dead of other cause	Alive or dead due to cancer
55436254	1	3	2	T3	T2	2	N1	0	unknown	unknown	2	0	1	0	0	0	0	1	10	1	8140/3: Adenocarcinoma, NOS	Dead (attributable to this cancer dx)	Alive or dead due to cancer
55455552	1	3	2	T2	T3	3	N0	0	unknown	unknown	2	0	0	0	0	1	0	1	2	1	8140/3: Adenocarcinoma, NOS	Dead (attributable to this cancer dx)	Alive or dead due to cancer
55459197	2	3	1	T2	T2	2	N0	0	unknown	unknown	2	0	1	0	0	1	0	1	2	1	8140/3: Adenocarcinoma, NOS	Dead (attributable to this cancer dx)	Alive or dead due to cancer
55464794	2	3	2	T4	T4	2	N0	0	unknown	unknown	3	0	0	0	0	1	0	1	1	0	8140/3: Adenocarcinoma, NOS	Alive or dead of other cause	Alive or dead due to cancer
55470678	1	3	1	T2	T2	2	N1	0	unknown	unknown	1	0	0	0	0	1	0	1	3	1	8140/3: Adenocarcinoma, NOS	Dead (attributable to this cancer dx)	Alive or dead due to cancer
55478762	1	3	1	T2	T2	2	N0	0	unknown	unknown	3	0	1	0	0	1	0	1	8	1	8140/3: Adenocarcinoma, NOS	Dead (attributable to this cancer dx)	Alive or dead due to cancer
55484643	2	3	2	T4	T4	3	N1	0	unknown	unknown	2	0	1	0	0	1	0	1	12	0	8140/3: Adenocarcinoma, NOS	Alive or dead of other cause	Alive or dead due to cancer
59256888	2	3	2	T2	T3	3	N0	0	unknown	unknown	3	0	1	0	0	1	0	1	6	1	8246/3: Neuroendocrine carcinoma, NOS	Dead (attributable to this cancer dx)	Alive or dead due to cancer
62141625	1	3	2	T3	T1	1	N0	1	3	3	1	1	1	0	0	1	0	1	25	1	8500/3: Infiltrating duct carcinoma, NOS	Dead (missing/unknown COD)	Dead (missing/unknown COD)
62154262	1	3	2	T3	T3	3	N1	0	unknown	unknown	3	0	1	0	0	1	0	1	3	1	8500/3: Infiltrating duct carcinoma, NOS	Dead (attributable to this cancer dx)	Alive or dead due to cancer
62662089	1	3	2	T4	T4	3	N0	0	3	3	3	0	1	0	0	1	0	1	1	1	8140/3: Adenocarcinoma, NOS	Dead (attributable to this cancer dx)	Alive or dead due to cancer
62799951	2	3	1	T2	T2	2	N0	0	unknown	unknown	1	0	0	1	0	0	0	0	15	0	8140/3: Adenocarcinoma, NOS	N/A not first tumor	N/A not first tumor
63339395	2	3	1	T4	T4	3	N0	0	unknown	unknown	2	0	1	0	0	0	0	1	6	1	8140/3: Adenocarcinoma, NOS	Dead (attributable to this cancer dx)	Alive or dead due to cancer
63339766	2	3	2	T2	T3	3	N0	0	unknown	unknown	2	0	1	1	0	1	0	1	4	1	8140/3: Adenocarcinoma, NOS	Dead (attributable to this cancer dx)	Alive or dead due to cancer
63343447	1	3	2	T3	T3	3	N0	0	unknown	unknown	3	0	1	0	0	1	0	1	3	1	8140/3: Adenocarcinoma, NOS	Dead (attributable to this cancer dx)	Alive or dead due to cancer
66753932	2	3	2	T2	T3	3	N0	0	unknown	unknown	2	0	1	0	0	1	0	0	3	1	8140/3: Adenocarcinoma, NOS	N/A not first tumor	N/A not first tumor
70556779	2	3	2	T4	T4	3	N1	0	1	1	1	0	1	0	0	1	1	0	6	1	8140/3: Adenocarcinoma, NOS	N/A not first tumor	N/A not first tumor
72154884	2	3	1	T3	T2	2	N0	0	unknown	unknown	1	0	0	0	0	1	0	1	1	1	8140/3: Adenocarcinoma, NOS	Dead (attributable to this cancer dx)	Alive or dead due to cancer
72166086	1	3	1	T3	T3	3	N1	0	unknown	unknown	1	0	1	0	0	1	0	1	11	1	8140/3: Adenocarcinoma, NOS	Dead (attributable to this cancer dx)	Alive or dead due to cancer
72184681	1	3	1	T3	T3	3	N0	1	2	2	2	0	1	0	0	0	0	1	4	1	8140/3: Adenocarcinoma, NOS	Dead (attributable to this cancer dx)	Alive or dead due to cancer
72191743	2	3	1	T2	T3	3	N0	0	unknown	unknown	2	0	0	0	0	0	0	1	1	1	8140/3: Adenocarcinoma, NOS	Dead (attributable to this cancer dx)	Alive or dead due to cancer
72197635	2	3	1	T4	T4	3	N0	0	unknown	unknown	2	0	1	0	0	1	0	1	7	1	8140/3: Adenocarcinoma, NOS	Dead (attributable to this cancer dx)	Alive or dead due to cancer
72202772	2	3	2	T2	T2	2	N0	0	3	3	1	1	1	0	0	1	0	1	11	1	8010/3: Carcinoma, NOS	Dead (attributable to this cancer dx)	Alive or dead due to cancer
72223579	1	3	1	T2	T2	2	N0	0	3	3	2	0	1	0	0	1	0	0	12	1	8140/3: Adenocarcinoma, NOS	N/A not first tumor	N/A not first tumor
72628956	2	3	2	T2	T2	2	N0	0	unknown	unknown	2	0	0	0	0	0	0	1	5	1	8140/3: Adenocarcinoma, NOS	Dead (attributable to this cancer dx)	Alive or dead due to cancer
72634859	2	3	1	T4	T4	3	N0	0	unknown	unknown	3	0	1	0	0	0	0	1	4	1	8140/3: Adenocarcinoma, NOS	Dead (attributable to this cancer dx)	Alive or dead due to cancer
72634865	2	3	1	T3	T2	2	N0	0	1	1	2	0	1	0	0	1	0	1	10	1	8500/3: Infiltrating duct carcinoma, NOS	Dead (attributable to this cancer dx)	Alive or dead due to cancer
72648051	1	3	2	T2	T2	2	N0	0	unknown	unknown	3	1	0	1	1	1	0	1	1	1	8140/3: Adenocarcinoma, NOS	Dead (attributable to this cancer dx)	Alive or dead due to cancer
72649088	2	3	2	T4	T4	3	N1	0	3	3	2	0	1	0	0	1	0	1	2	1	8480/3: Mucinous adenocarcinoma	Dead (attributable to this cancer dx)	Alive or dead due to cancer
72662241	2	3	2	T2	T3	3	N1	0	3	3	2	0	1	1	0	1	0	1	1	1	8140/3: Adenocarcinoma, NOS	Dead (attributable to this cancer dx)	Alive or dead due to cancer
72669462	1	3	1	T2	T2	2	N0	1	2	2	2	0	0	0	0	1	0	1	79	0	8246/3: Neuroendocrine carcinoma, NOS	Alive or dead of other cause	Alive or dead due to cancer
72684728	1	3	1	T3	T3	3	N1	0	unknown	unknown	3	0	1	0	0	1	0	1	44	1	8240/3: Carcinoid tumor, NOS	Dead (attributable to this cancer dx)	Alive or dead due to cancer
72741508	2	3	2	T3	T2	2	N1	1	unknown	unknown	1	1	1	0	0	1	0	1	17	0	8140/3: Adenocarcinoma, NOS	Alive or dead of other cause	Alive or dead due to cancer
72763001	2	3	1	T3	T3	3	N0	0	unknown	unknown	1	0	0	0	0	0	0	1	1	1	8140/3: Adenocarcinoma, NOS	Dead (attributable to this cancer dx)	Alive or dead due to cancer
73175602	1	3	1	T3	T3	3	N0	0	4	3	1	0	1	0	0	1	0	1	9	1	8140/3: Adenocarcinoma, NOS	Dead (attributable to this cancer dx)	Alive or dead due to cancer
73182495	2	3	2	T2	T2	2	N0	0	2	2	3	0	1	0	0	1	0	1	8	1	8480/3: Mucinous adenocarcinoma	Dead (attributable to this cancer dx)	Alive or dead due to cancer
73204037	2	3	2	T2	T3	3	N1	0	unknown	unknown	3	0	1	0	0	1	0	1	9	1	8560/3: Adenosquamous carcinoma	Dead (attributable to this cancer dx)	Alive or dead due to cancer
73221296	2	3	2	T2	T2	2	N0	0	3	3	1	0	0	0	0	1	0	1	3	1	8140/3: Adenocarcinoma, NOS	Dead (attributable to this cancer dx)	Alive or dead due to cancer
73245508	1	3	1	T2	T2	2	N1	0	unknown	unknown	1	0	1	0	0	1	0	1	11	1	8140/3: Adenocarcinoma, NOS	Dead (attributable to this cancer dx)	Alive or dead due to cancer
73248357	2	3	2	T3	T3	3	N0	0	unknown	unknown	1	0	0	0	0	1	0	1	3	1	8490/3: Signet ring cell carcinoma	Dead (attributable to this cancer dx)	Alive or dead due to cancer
73250097	2	3	2	T3	T2	2	N0	0	unknown	unknown	1	0	1	0	0	1	0	1	5	1	8140/3: Adenocarcinoma, NOS	Dead (attributable to this cancer dx)	Alive or dead due to cancer
73253149	1	3	1	T3	T3	3	N1	0	unknown	unknown	3	0	1	0	0	1	0	1	26	1	8140/3: Adenocarcinoma, NOS	Dead (attributable to this cancer dx)	Alive or dead due to cancer
73262622	1	3	1	T4	T4	3	N0	0	unknown	unknown	1	0	1	0	0	0	0	1	6	1	8140/3: Adenocarcinoma, NOS	Dead (attributable to this cancer dx)	Alive or dead due to cancer
73265331	2	3	2	T4	T4	3	N1	0	unknown	unknown	2	0	1	0	0	1	0	1	12	1	8140/3: Adenocarcinoma, NOS	Dead (attributable to this cancer dx)	Alive or dead due to cancer
73271479	1	3	2	T2	T2	2	N0	0	2	2	1	0	1	0	0	1	0	1	9	1	8140/3: Adenocarcinoma, NOS	Dead (attributable to this cancer dx)	Alive or dead due to cancer
73285954	2	3	1	T2	T2	2	N0	0	3	3	2	0	0	0	0	1	1	1	1	1	8246/3: Neuroendocrine carcinoma, NOS	Dead (attributable to this cancer dx)	Alive or dead due to cancer
73312155	2	3	2	T3	T3	3	N1	0	unknown	unknown	1	0	1	0	0	0	0	1	30	0	8140/3: Adenocarcinoma, NOS	Alive or dead of other cause	Alive or dead due to cancer
73314607	1	3	2	T2	T3	3	N1	0	unknown	unknown	3	0	1	1	0	0	1	1	8	1	8480/3: Mucinous adenocarcinoma	Dead (attributable to this cancer dx)	Alive or dead due to cancer
73721401	2	3	2	T3	T3	3	N0	0	unknown	unknown	3	0	1	0	0	0	0	1	3	1	8140/3: Adenocarcinoma, NOS	Dead (attributable to this cancer dx)	Alive or dead due to cancer
73749045	2	3	1	T4	T4	3	N1	0	unknown	unknown	3	0	1	0	0	1	0	1	2	1	8140/3: Adenocarcinoma, NOS	Dead (attributable to this cancer dx)	Alive or dead due to cancer
73780851	2	3	2	T2	T2	2	N1	0	unknown	unknown	1	0	1	0	0	1	1	1	4	1	8140/3: Adenocarcinoma, NOS	Dead (attributable to this cancer dx)	Alive or dead due to cancer
73857748	2	3	1	T4	T4	3	N0	0	2	2	2	0	0	0	0	0	1	1	3	1	8140/3: Adenocarcinoma, NOS	Dead (attributable to this cancer dx)	Alive or dead due to cancer
76635429	2	3	2	T2	T3	3	N0	0	unknown	unknown	3	0	1	0	0	1	0	1	1	1	8140/3: Adenocarcinoma, NOS	Dead (attributable to this cancer dx)	Alive or dead due to cancer
77668562	2	3	2	T3	T3	3	N1	0	3	3	1	0	1	0	0	1	0	1	1	1	8013/3: Large cell neuroendocrine carcinoma	Dead (attributable to this cancer dx)	Alive or dead due to cancer
77674677	2	3	1	T3	T2	2	N1	0	unknown	unknown	2	0	0	0	0	0	0	1	4	1	8140/3: Adenocarcinoma, NOS	Dead (attributable to this cancer dx)	Alive or dead due to cancer
2271080	2	2	2	T2	T2	2	N0	0	unknown	unknown	2	0	1	0	0	1	0	0	9	1	8140/3: Adenocarcinoma, NOS	N/A not first tumor	N/A not first tumor
2900675	2	2	2	T2	T3	3	N0	0	unknown	unknown	2	0	0	0	0	1	0	0	1	1	8140/3: Adenocarcinoma, NOS	N/A not first tumor	N/A not first tumor
2910025	2	2	2	T2	T2	2	N1	0	unknown	unknown	2	0	0	0	0	0	1	0	4	1	8140/3: Adenocarcinoma, NOS	N/A not first tumor	N/A not first tumor
3985840	2	2	2	T4	T4	2	N0	0	2	2	2	0	1	0	0	1	0	1	1	1	8140/3: Adenocarcinoma, NOS	Dead (attributable to this cancer dx)	Alive or dead due to cancer
3987365	2	2	1	T1	T1	1	N0	0	2	2	2	0	1	0	0	1	0	1	10	1	8140/3: Adenocarcinoma, NOS	Dead (attributable to this cancer dx)	Alive or dead due to cancer
3990335	2	2	1	T2	T3	3	N1	0	unknown	unknown	3	0	0	0	0	1	0	0	1	1	8140/3: Adenocarcinoma, NOS	N/A not first tumor	N/A not first tumor
3991715	2	2	2	T2	T2	2	N0	0	unknown	unknown	1	0	0	0	0	1	0	1	2	1	8140/3: Adenocarcinoma, NOS	Dead (attributable to this cancer dx)	Alive or dead due to cancer
3992743	2	2	1	T3	T3	3	N0	0	2	2	1	0	0	0	0	1	0	1	6	1	8480/3: Mucinous adenocarcinoma	Dead (attributable to this cancer dx)	Alive or dead due to cancer
4001712	2	2	2	T1	T1	1	N0	0	unknown	unknown	2	1	1	0	0	1	0	1	4	1	8140/3: Adenocarcinoma, NOS	Dead (attributable to this cancer dx)	Alive or dead due to cancer
4004358	2	2	1	T3	T3	3	N1	0	unknown	unknown	2	0	1	0	0	1	0	1	1	1	8246/3: Neuroendocrine carcinoma, NOS	Dead (attributable to this cancer dx)	Alive or dead due to cancer
4016169	1	2	2	T2	T2	2	N0	0	unknown	unknown	2	0	1	0	0	1	1	1	6	1	8140/3: Adenocarcinoma, NOS	Dead (attributable to this cancer dx)	Alive or dead due to cancer
4016394	2	2	1	T2	T3	3	N0	0	unknown	unknown	2	0	0	0	0	1	0	1	1	1	8140/3: Adenocarcinoma, NOS	Dead (attributable to this cancer dx)	Alive or dead due to cancer
4017563	2	2	1	T2	T2	2	N0	0	unknown	unknown	2	0	1	0	0	1	0	1	8	1	8140/3: Adenocarcinoma, NOS	Dead (attributable to this cancer dx)	Alive or dead due to cancer
4018145	2	2	2	T2	T3	3	N0	0	unknown	unknown	3	0	0	0	0	1	1	1	1	1	8140/3: Adenocarcinoma, NOS	Dead (attributable to this cancer dx)	Alive or dead due to cancer
4019067	2	2	1	T3	T2	2	N0	0	unknown	unknown	2	0	1	0	0	1	0	1	9	1	8140/3: Adenocarcinoma, NOS	Dead (attributable to this cancer dx)	Alive or dead due to cancer
4020904	2	2	1	T3	T2	2	N0	0	2	2	2	0	1	0	0	1	0	1	8	1	8140/3: Adenocarcinoma, NOS	Dead (attributable to this cancer dx)	Alive or dead due to cancer
4026165	2	2	1	T2	T3	3	N0	0	unknown	unknown	2	0	1	0	0	1	0	1	21	1	8140/3: Adenocarcinoma, NOS	Dead (attributable to this cancer dx)	Alive or dead due to cancer
4034257	2	2	1	T4	T4	2	N0	0	3	3	1	0	1	0	0	1	0	1	31	1	8140/3: Adenocarcinoma, NOS	Dead (attributable to this cancer dx)	Alive or dead due to cancer
4034259	1	2	2	T2	T2	2	N0	0	unknown	unknown	1	0	1	0	0	1	0	1	4	1	8140/3: Adenocarcinoma, NOS	Dead (attributable to this cancer dx)	Alive or dead due to cancer
4042037	2	2	2	T3	T2	2	N0	0	unknown	unknown	2	0	0	0	0	1	0	0	1	1	8140/3: Adenocarcinoma, NOS	N/A not first tumor	N/A not first tumor
4046486	2	2	1	T4	T4	2	N1	0	unknown	unknown	2	0	1	0	0	0	0	1	4	1	8140/3: Adenocarcinoma, NOS	Dead (attributable to this cancer dx)	Alive or dead due to cancer
4052625	2	2	2	T3	T3	3	N1	0	unknown	unknown	1	0	1	0	0	1	0	1	1	1	8140/3: Adenocarcinoma, NOS	Dead (attributable to this cancer dx)	Alive or dead due to cancer
4057445	2	2	2	T2	T2	2	N0	0	2	2	2	0	0	0	0	1	0	1	1	1	8140/3: Adenocarcinoma, NOS	Dead (attributable to this cancer dx)	Alive or dead due to cancer
4066160	1	2	2	T2	T3	3	N0	0	unknown	unknown	2	0	0	0	0	1	1	1	3	1	8140/3: Adenocarcinoma, NOS	Dead (attributable to this cancer dx)	Alive or dead due to cancer
4067100	2	2	1	T3	T3	3	N0	0	unknown	unknown	2	0	1	0	0	1	0	1	1	1	8140/3: Adenocarcinoma, NOS	Dead (attributable to this cancer dx)	Alive or dead due to cancer
4076602	2	2	2	T1	T1	1	N1	0	2	2	1	0	1	0	0	1	0	1	8	1	8140/3: Adenocarcinoma, NOS	Dead (attributable to this cancer dx)	Alive or dead due to cancer
4076760	2	2	2	T1	T1	1	N0	0	unknown	unknown	1	0	0	0	0	1	0	1	1	1	8010/3: Carcinoma, NOS	Dead (attributable to this cancer dx)	Alive or dead due to cancer
4078080	1	2	1	T1	T1	1	N0	0	unknown	unknown	3	0	1	0	0	1	0	1	14	1	8246/3: Neuroendocrine carcinoma, NOS	Dead (attributable to this cancer dx)	Alive or dead due to cancer
4078665	2	2	2	T4	T4	3	N1	0	unknown	unknown	3	0	1	0	1	0	0	1	2	1	8140/3: Adenocarcinoma, NOS	Dead (attributable to this cancer dx)	Alive or dead due to cancer
4079916	2	2	2	T4	T4	2	N0	0	2	2	3	1	1	0	0	0	0	1	7	1	8140/3: Adenocarcinoma, NOS	Dead (attributable to this cancer dx)	Alive or dead due to cancer
4080253	1	2	2	T2	T3	3	N0	0	unknown	unknown	3	0	1	0	0	1	0	1	9	1	8140/3: Adenocarcinoma, NOS	Dead (attributable to this cancer dx)	Alive or dead due to cancer
4081259	1	2	2	T2	T2	2	N0	0	2	2	2	0	1	0	0	1	0	1	4	1	8140/3: Adenocarcinoma, NOS	Dead (attributable to this cancer dx)	Alive or dead due to cancer
4083360	2	2	1	T2	T3	3	N0	0	unknown	unknown	3	0	1	0	0	1	0	1	1	1	8140/3: Adenocarcinoma, NOS	Alive or dead of other cause	Dead (attributable to causes other than this cancer dx)
4087288	2	2	1	T3	T3	3	N1	0	3	3	3	0	0	0	0	1	0	1	2	1	8140/3: Adenocarcinoma, NOS	Dead (attributable to this cancer dx)	Alive or dead due to cancer
4089873	2	2	2	T2	T2	2	N0	0	unknown	unknown	1	0	1	0	0	1	0	1	5	1	8140/3: Adenocarcinoma, NOS	Dead (attributable to this cancer dx)	Alive or dead due to cancer
4090635	2	2	2	T3	T3	3	N0	0	unknown	unknown	2	0	1	0	0	1	0	1	1	1	8140/3: Adenocarcinoma, NOS	Dead (attributable to this cancer dx)	Alive or dead due to cancer
4093798	2	2	1	T2	T3	3	N0	0	unknown	unknown	3	0	1	0	0	1	0	1	4	1	8140/3: Adenocarcinoma, NOS	Dead (attributable to this cancer dx)	Alive or dead due to cancer
4097053	2	2	2	T4	T4	3	N0	0	unknown	unknown	2	0	1	0	0	1	0	1	17	1	8140/3: Adenocarcinoma, NOS	Dead (attributable to this cancer dx)	Alive or dead due to cancer
4097623	1	2	2	T3	T3	3	N0	0	unknown	unknown	2	0	1	0	0	0	0	1	26	1	8140/3: Adenocarcinoma, NOS	Dead (missing/unknown COD)	Dead (missing/unknown COD)
4101846	1	2	2	T2	T2	2	N0	0	unknown	unknown	2	0	1	0	0	1	0	1	12	1	8140/3: Adenocarcinoma, NOS	Dead (attributable to this cancer dx)	Alive or dead due to cancer
4102097	2	2	1	T3	T3	3	N1	0	unknown	unknown	1	0	0	0	0	1	0	1	3	1	8140/3: Adenocarcinoma, NOS	Dead (attributable to this cancer dx)	Alive or dead due to cancer
4106425	1	2	1	T1	T1	1	N0	0	unknown	unknown	2	0	0	0	0	0	0	0	18	1	8246/3: Neuroendocrine carcinoma, NOS	N/A not first tumor	N/A not first tumor
4108070	1	2	1	T2	T2	2	N0	0	unknown	unknown	2	0	1	1	0	1	1	1	2	1	8140/3: Adenocarcinoma, NOS	Dead (attributable to this cancer dx)	Alive or dead due to cancer
4108700	1	2	1	T4	T4	3	N1	0	unknown	unknown	2	0	1	0	0	0	1	1	3	1	8140/3: Adenocarcinoma, NOS	Dead (attributable to this cancer dx)	Alive or dead due to cancer
4112190	2	2	2	T3	T3	3	N1	0	unknown	unknown	2	0	1	0	0	1	0	1	1	1	8140/3: Adenocarcinoma, NOS	Dead (attributable to this cancer dx)	Alive or dead due to cancer
4112305	1	2	1	T2	T2	2	N1	1	2	2	1	0	1	0	0	1	0	1	10	1	8500/3: Infiltrating duct carcinoma, NOS	Dead (attributable to this cancer dx)	Alive or dead due to cancer
4116054	1	2	2	T3	T3	3	N0	0	unknown	unknown	1	1	1	0	0	1	0	1	25	1	8246/3: Neuroendocrine carcinoma, NOS	Dead (attributable to this cancer dx)	Alive or dead due to cancer
4116114	1	2	1	T3	T3	3	N1	0	unknown	unknown	2	0	1	0	0	1	0	1	3	1	8140/3: Adenocarcinoma, NOS	Dead (attributable to this cancer dx)	Alive or dead due to cancer
4118895	2	2	1	T4	T4	3	N1	0	3	3	1	0	0	0	0	1	1	1	2	1	8140/3: Adenocarcinoma, NOS	Dead (attributable to this cancer dx)	Alive or dead due to cancer
4125832	2	2	2	T2	T3	3	N1	0	unknown	unknown	2	0	0	0	0	1	0	1	5	1	8140/3: Adenocarcinoma, NOS	Dead (attributable to this cancer dx)	Alive or dead due to cancer
4127901	2	2	1	T4	T4	2	N0	0	3	3	1	0	1	0	0	1	0	1	10	1	8140/3: Adenocarcinoma, NOS	Dead (attributable to this cancer dx)	Alive or dead due to cancer
4129410	2	2	1	T4	T4	2	N0	0	2	2	2	0	1	0	0	0	0	0	10	1	8140/3: Adenocarcinoma, NOS	N/A not first tumor	N/A not first tumor
4134293	2	2	1	T4	T4	3	N1	0	unknown	unknown	3	0	1	0	0	1	1	1	38	0	8140/3: Adenocarcinoma, NOS	Alive or dead of other cause	Alive or dead due to cancer
4534938	2	2	1	T2	T2	2	N0	0	2	2	3	0	0	0	0	1	0	1	1	0	8140/3: Adenocarcinoma, NOS	Alive or dead of other cause	Alive or dead due to cancer
4544378	2	2	1	T2	T2	2	N0	1	unknown	unknown	1	0	1	0	0	1	1	1	8	1	8140/3: Adenocarcinoma, NOS	Dead (attributable to this cancer dx)	Alive or dead due to cancer
4548885	2	2	2	T2	T2	2	N0	0	unknown	unknown	1	0	1	0	0	1	0	1	2	1	8140/3: Adenocarcinoma, NOS	Dead (attributable to this cancer dx)	Alive or dead due to cancer
4550681	1	2	2	T2	T2	2	N0	0	unknown	unknown	1	0	0	0	0	1	0	1	6	1	8140/3: Adenocarcinoma, NOS	Dead (attributable to this cancer dx)	Alive or dead due to cancer
4550942	2	2	1	T2	T2	2	N0	0	unknown	unknown	2	0	1	0	0	1	0	1	6	1	8140/3: Adenocarcinoma, NOS	Dead (attributable to this cancer dx)	Alive or dead due to cancer
4551290	2	2	1	T3	T3	3	N1	1	unknown	unknown	2	0	1	0	0	1	0	1	6	1	8140/3: Adenocarcinoma, NOS	Dead (attributable to this cancer dx)	Alive or dead due to cancer
4554183	1	2	1	T4	T4	3	N1	0	unknown	unknown	3	1	1	0	0	0	1	1	19	1	8140/3: Adenocarcinoma, NOS	Dead (attributable to this cancer dx)	Alive or dead due to cancer
4554864	1	2	2	T3	T2	2	N0	0	unknown	unknown	2	0	1	0	0	1	0	1	13	1	8140/3: Adenocarcinoma, NOS	Dead (attributable to this cancer dx)	Alive or dead due to cancer
4557385	2	2	2	T3	T2	2	N0	0	unknown	unknown	1	1	1	0	0	0	1	1	5	1	8140/3: Adenocarcinoma, NOS	Dead (attributable to this cancer dx)	Alive or dead due to cancer
4557821	1	2	1	T4	T4	3	N1	0	unknown	unknown	2	0	0	0	0	1	0	1	5	1	8140/3: Adenocarcinoma, NOS	Dead (attributable to this cancer dx)	Alive or dead due to cancer
4558930	1	2	2	T4	T4	3	N0	0	3	3	3	0	1	0	0	0	0	1	24	1	8500/3: Infiltrating duct carcinoma, NOS	Dead (attributable to this cancer dx)	Alive or dead due to cancer
4560283	2	2	1	T3	T3	3	N1	0	4	3	1	1	1	0	0	1	0	1	5	1	8021/3: Carcinoma, anaplastic, NOS	Dead (attributable to this cancer dx)	Alive or dead due to cancer
4569013	2	2	1	T3	T3	3	N0	0	unknown	unknown	2	0	1	0	0	1	0	1	18	1	8140/3: Adenocarcinoma, NOS	Dead (attributable to this cancer dx)	Alive or dead due to cancer
4581441	2	2	2	T4	T4	3	N0	0	3	3	2	0	1	0	0	1	0	1	5	1	8140/3: Adenocarcinoma, NOS	Dead (attributable to this cancer dx)	Alive or dead due to cancer
4582623	2	2	1	T3	T3	3	N1	0	2	2	3	0	0	0	0	1	0	1	3	0	8140/3: Adenocarcinoma, NOS	Alive or dead of other cause	Alive or dead due to cancer
4595567	2	2	1	T2	T3	3	N1	0	unknown	unknown	2	0	1	0	0	1	0	1	9	1	8140/3: Adenocarcinoma, NOS	Dead (attributable to this cancer dx)	Alive or dead due to cancer
4595971	1	2	1	T2	T3	3	N0	0	3	3	1	0	1	0	0	1	0	1	6	1	8140/3: Adenocarcinoma, NOS	Dead (attributable to this cancer dx)	Alive or dead due to cancer
4600573	2	2	1	T4	T4	3	N1	0	unknown	unknown	2	0	0	0	0	1	1	1	1	1	8140/3: Adenocarcinoma, NOS	Dead (attributable to this cancer dx)	Alive or dead due to cancer
4607001	2	2	1	T2	T2	2	N1	0	unknown	unknown	1	0	1	0	0	1	0	1	15	0	8140/3: Adenocarcinoma, NOS	Alive or dead of other cause	Alive or dead due to cancer
4610389	2	2	2	T3	T3	3	N0	0	2	2	2	0	0	0	0	0	0	1	10	1	8140/3: Adenocarcinoma, NOS	Dead (attributable to this cancer dx)	Alive or dead due to cancer
4611406	2	2	1	T3	T3	3	N0	0	unknown	unknown	3	0	1	0	0	0	0	1	10	1	8480/3: Mucinous adenocarcinoma	Dead (attributable to this cancer dx)	Alive or dead due to cancer
4619045	1	2	2	T2	T3	3	N1	0	unknown	unknown	3	0	0	0	0	1	0	1	1	1	8500/3: Infiltrating duct carcinoma, NOS	Dead (attributable to this cancer dx)	Alive or dead due to cancer
4619646	2	2	1	T2	T3	3	N0	0	unknown	unknown	3	0	1	0	0	1	0	1	7	1	8140/3: Adenocarcinoma, NOS	Dead (missing/unknown COD)	Dead (missing/unknown COD)
7283456	2	2	2	T3	T3	3	N0	0	unknown	unknown	1	0	1	0	0	1	0	0	9	1	8140/3: Adenocarcinoma, NOS	N/A not first tumor	N/A not first tumor
7373974	2	2	1	T2	T2	2	N0	0	unknown	unknown	2	0	0	0	0	1	0	0	1	1	8140/3: Adenocarcinoma, NOS	N/A not first tumor	N/A not first tumor
7385858	2	2	1	T4	T4	3	N0	0	3	3	2	0	1	0	0	1	0	0	1	1	8140/3: Adenocarcinoma, NOS	N/A not first tumor	N/A not first tumor
7869712	2	2	1	T3	T3	3	N0	0	unknown	unknown	2	0	0	0	0	0	1	0	1	1	8140/3: Adenocarcinoma, NOS	N/A not first tumor	N/A not first tumor
7953068	2	2	2	T3	T2	2	N0	0	unknown	unknown	1	0	0	0	0	1	1	0	1	1	8010/3: Carcinoma, NOS	N/A not first tumor	N/A not first tumor
8914239	2	2	1	T4	T4	2	N0	0	3	3	3	0	1	0	0	1	0	0	3	1	8140/3: Adenocarcinoma, NOS	N/A not first tumor	N/A not first tumor
8959893	1	2	1	T2	T2	2	N0	0	unknown	unknown	2	0	1	0	0	1	0	1	6	1	8140/3: Adenocarcinoma, NOS	Dead (attributable to this cancer dx)	Alive or dead due to cancer
8971874	1	2	1	T4	T4	3	N0	0	3	3	1	0	1	0	0	1	1	1	5	1	8560/3: Adenosquamous carcinoma	Dead (attributable to this cancer dx)	Alive or dead due to cancer
8977265	1	2	1	T2	T2	2	N0	0	unknown	unknown	2	0	0	0	0	1	0	1	1	1	8140/3: Adenocarcinoma, NOS	Dead (attributable to this cancer dx)	Alive or dead due to cancer
8977777	2	2	1	T3	T2	2	N0	0	2	2	2	0	1	1	0	1	1	1	4	1	8140/3: Adenocarcinoma, NOS	Dead (attributable to this cancer dx)	Alive or dead due to cancer
8987617	2	2	2	T4	T4	3	N1	0	unknown	unknown	1	0	1	0	0	1	0	1	12	1	8246/3: Neuroendocrine carcinoma, NOS	Dead (attributable to this cancer dx)	Alive or dead due to cancer
8988079	1	2	1	T2	T3	3	N1	0	1	1	2	0	0	0	0	1	0	1	73	0	8246/3: Neuroendocrine carcinoma, NOS	Alive or dead of other cause	Alive or dead due to cancer
8991290	2	2	1	T3	T3	3	N0	0	2	2	1	0	1	0	0	1	0	1	3	1	8140/3: Adenocarcinoma, NOS	Dead (attributable to this cancer dx)	Alive or dead due to cancer
8992975	2	2	2	T3	T3	3	N1	0	unknown	unknown	2	0	0	0	0	1	0	1	1	1	8140/3: Adenocarcinoma, NOS	Dead (attributable to this cancer dx)	Alive or dead due to cancer
9002682	2	2	2	T2	T2	2	N1	0	unknown	unknown	2	0	1	0	0	1	0	1	8	1	8140/3: Adenocarcinoma, NOS	Dead (attributable to this cancer dx)	Alive or dead due to cancer
9006087	2	2	2	T3	T3	3	N0	0	unknown	unknown	2	0	1	0	0	1	0	1	2	1	8140/3: Adenocarcinoma, NOS	Dead (attributable to this cancer dx)	Alive or dead due to cancer
9006094	1	2	2	T3	T2	2	N1	0	3	3	3	0	0	0	0	1	1	1	2	1	8140/3: Adenocarcinoma, NOS	Dead (attributable to this cancer dx)	Alive or dead due to cancer
9008440	2	2	1	T4	T4	2	N0	0	2	2	1	0	1	0	0	1	0	1	4	1	8140/3: Adenocarcinoma, NOS	Dead (attributable to this cancer dx)	Alive or dead due to cancer
9009971	1	2	2	T3	T2	2	N0	0	2	2	2	0	1	0	0	0	0	1	11	1	8140/3: Adenocarcinoma, NOS	Dead (attributable to this cancer dx)	Alive or dead due to cancer
9010182	1	2	2	T1	T1	1	N1	0	unknown	unknown	1	0	1	1	0	0	0	1	11	1	8140/3: Adenocarcinoma, NOS	Dead (attributable to this cancer dx)	Alive or dead due to cancer
9014783	2	2	2	T3	T2	2	N0	0	2	2	2	0	1	0	0	1	0	1	2	1	8560/3: Adenosquamous carcinoma	Dead (attributable to this cancer dx)	Alive or dead due to cancer
9017076	1	2	2	T4	T4	2	N1	0	1	1	1	0	0	0	0	0	0	1	8	1	8140/3: Adenocarcinoma, NOS	Dead (attributable to this cancer dx)	Alive or dead due to cancer
9017687	2	2	2	T3	T3	3	N0	0	unknown	unknown	1	0	1	0	0	1	0	1	3	1	8140/3: Adenocarcinoma, NOS	Dead (attributable to this cancer dx)	Alive or dead due to cancer
9023249	2	2	1	T4	T4	2	N1	0	unknown	unknown	1	0	0	0	0	1	0	1	2	1	8140/3: Adenocarcinoma, NOS	Dead (attributable to this cancer dx)	Alive or dead due to cancer
9031711	2	2	1	T3	T3	3	N0	0	unknown	unknown	2	0	1	0	0	1	0	1	5	1	8140/3: Adenocarcinoma, NOS	Dead (attributable to this cancer dx)	Alive or dead due to cancer
9043428	2	2	2	T3	T3	3	N0	0	2	2	3	0	0	0	0	1	0	1	2	1	8140/3: Adenocarcinoma, NOS	Alive or dead of other cause	Dead (attributable to causes other than this cancer dx)
9045227	2	2	2	T3	T2	2	N1	0	unknown	unknown	2	0	1	0	0	1	1	1	2	1	8140/3: Adenocarcinoma, NOS	Dead (attributable to this cancer dx)	Alive or dead due to cancer
9054824	2	2	1	T4	T4	3	N0	0	2	2	1	0	1	0	0	1	1	1	9	1	8140/3: Adenocarcinoma, NOS	Dead (attributable to this cancer dx)	Alive or dead due to cancer
9457510	1	2	1	T4	T4	3	N1	0	unknown	unknown	1	0	1	0	0	1	0	1	36	1	8150/3: Pancreatic endocrine tumor, malignant	Dead (attributable to this cancer dx)	Alive or dead due to cancer
9460423	2	2	1	T2	T2	2	N0	0	unknown	unknown	1	0	1	0	0	1	0	0	5	1	8140/3: Adenocarcinoma, NOS	N/A not first tumor	N/A not first tumor
9460858	1	2	1	T4	T4	3	N1	0	unknown	unknown	3	0	1	0	0	1	0	1	31	0	8246/3: Neuroendocrine carcinoma, NOS	Alive or dead of other cause	Alive or dead due to cancer
9464694	1	2	2	T3	T2	2	N1	0	unknown	unknown	1	0	1	1	0	0	0	1	11	1	8140/3: Adenocarcinoma, NOS	Dead (attributable to this cancer dx)	Alive or dead due to cancer
9473950	1	2	1	T2	T2	2	N1	0	3	3	2	0	1	0	0	1	0	1	1	1	8140/3: Adenocarcinoma, NOS	Dead (attributable to this cancer dx)	Alive or dead due to cancer
9486946	2	2	1	T3	T3	3	N1	0	unknown	unknown	3	0	0	0	0	1	0	1	1	1	8140/3: Adenocarcinoma, NOS	Dead (attributable to this cancer dx)	Alive or dead due to cancer
9495131	2	2	1	T2	T3	3	N1	0	unknown	unknown	3	0	0	0	0	1	0	1	29	0	8150/3: Pancreatic endocrine tumor, malignant	Alive or dead of other cause	Alive or dead due to cancer
9502870	2	2	2	T2	T2	2	N1	0	unknown	unknown	1	0	0	0	0	0	1	1	20	1	8140/3: Adenocarcinoma, NOS	Dead (attributable to this cancer dx)	Alive or dead due to cancer
9507062	2	2	1	T3	T3	3	N1	0	2	2	2	0	0	0	0	1	0	1	2	1	8140/3: Adenocarcinoma, NOS	Dead (attributable to this cancer dx)	Alive or dead due to cancer
9509641	2	2	2	T2	T2	2	N0	0	unknown	unknown	1	0	1	0	0	0	0	1	5	1	8140/3: Adenocarcinoma, NOS	Dead (attributable to this cancer dx)	Alive or dead due to cancer
9511032	1	2	1	T2	T2	2	N1	0	unknown	unknown	1	0	1	0	0	1	0	1	12	1	8249/3: Atypical carcinoid tumor	Dead (attributable to this cancer dx)	Alive or dead due to cancer
9512530	2	2	2	T2	T2	2	N0	0	unknown	unknown	3	0	0	0	0	0	0	1	4	1	8140/3: Adenocarcinoma, NOS	Dead (attributable to this cancer dx)	Alive or dead due to cancer
9525742	2	2	2	T3	T2	2	N0	0	3	3	2	0	1	0	0	1	0	1	3	1	8140/3: Adenocarcinoma, NOS	Dead (attributable to this cancer dx)	Alive or dead due to cancer
9536250	2	2	2	T2	T2	2	N0	0	unknown	unknown	2	0	1	0	0	0	0	1	12	1	8140/3: Adenocarcinoma, NOS	Dead (attributable to this cancer dx)	Alive or dead due to cancer
9540441	2	2	1	T3	T3	3	N0	0	unknown	unknown	2	0	0	0	0	0	0	1	1	1	8140/3: Adenocarcinoma, NOS	Dead (attributable to this cancer dx)	Alive or dead due to cancer
9547068	2	2	2	T3	T2	2	N0	1	1	1	3	0	1	0	0	1	0	1	16	1	8140/3: Adenocarcinoma, NOS	Dead (attributable to this cancer dx)	Alive or dead due to cancer
9553052	2	2	2	T2	T2	2	N0	0	unknown	unknown	2	0	0	0	0	1	0	1	1	1	8140/3: Adenocarcinoma, NOS	Dead (attributable to this cancer dx)	Alive or dead due to cancer
9558818	2	2	1	T4	T4	3	N0	0	unknown	unknown	1	0	1	0	0	1	0	1	10	1	8140/3: Adenocarcinoma, NOS	Dead (attributable to this cancer dx)	Alive or dead due to cancer
9569656	2	2	1	T3	T2	2	N0	0	3	3	1	0	0	0	0	1	0	1	1	1	8500/3: Infiltrating duct carcinoma, NOS	Dead (attributable to this cancer dx)	Alive or dead due to cancer
10013685	2	2	2	T3	T2	2	N1	0	3	3	1	0	0	0	0	1	1	0	1	1	8140/3: Adenocarcinoma, NOS	N/A not first tumor	N/A not first tumor
10100366	2	2	2	T2	T3	3	N0	0	unknown	unknown	1	0	1	0	0	1	0	0	3	1	8140/3: Adenocarcinoma, NOS	N/A not first tumor	N/A not first tumor
10571711	2	2	2	T2	T2	2	N0	0	unknown	unknown	3	0	1	0	0	1	0	0	34	0	8246/3: Neuroendocrine carcinoma, NOS	N/A not first tumor	N/A not first tumor
11194914	2	2	2	T3	T3	3	N1	0	unknown	unknown	1	1	1	1	0	0	0	0	4	1	8500/3: Infiltrating duct carcinoma, NOS	N/A not first tumor	N/A not first tumor
11756131	2	2	2	T2	T3	3	N0	0	2	2	2	0	1	0	0	1	1	0	21	1	8140/3: Adenocarcinoma, NOS	N/A not first tumor	N/A not first tumor
11763748	2	2	2	T2	T3	3	N0	0	2	2	3	0	0	0	0	1	0	0	5	1	8140/3: Adenocarcinoma, NOS	N/A not first tumor	N/A not first tumor
11830306	2	2	2	T2	T2	2	N0	0	unknown	unknown	1	0	0	0	0	1	0	0	1	1	8140/3: Adenocarcinoma, NOS	N/A not first tumor	N/A not first tumor
12246174	2	2	1	T2	T3	3	N0	0	unknown	unknown	3	0	1	0	0	1	0	0	8	1	8140/3: Adenocarcinoma, NOS	N/A not first tumor	N/A not first tumor
12282001	2	2	1	T2	T3	3	N0	0	unknown	unknown	2	0	1	0	0	1	0	0	34	0	8240/3: Carcinoid tumor, NOS	N/A not first tumor	N/A not first tumor
12809223	2	2	2	T2	T3	3	N0	0	unknown	unknown	2	0	1	0	0	1	1	1	20	1	8140/3: Adenocarcinoma, NOS	N/A not first tumor	N/A not first tumor
12839616	2	2	2	T3	T2	2	N0	0	3	3	1	0	0	0	0	1	0	0	2	1	8140/3: Adenocarcinoma, NOS	N/A not first tumor	N/A not first tumor
12844536	2	2	1	T3	T3	3	N1	1	3	3	3	0	0	0	0	0	0	0	2	1	8500/3: Infiltrating duct carcinoma, NOS	N/A not first tumor	N/A not first tumor
12850660	1	2	2	T3	T2	2	N1	1	3	3	1	1	1	0	0	0	0	0	5	1	8500/3: Infiltrating duct carcinoma, NOS	N/A not first tumor	N/A not first tumor
12894115	2	2	2	T3	T2	2	N0	0	unknown	unknown	1	0	1	0	0	1	0	1	19	1	8140/3: Adenocarcinoma, NOS	Dead (attributable to this cancer dx)	Alive or dead due to cancer
13375615	2	2	2	T4	T4	3	N1	0	3	3	1	0	1	0	0	1	0	0	27	0	8140/3: Adenocarcinoma, NOS	N/A not first tumor	N/A not first tumor
13411672	2	2	2	T1	T1	1	N0	0	unknown	unknown	2	0	0	0	0	1	1	1	1	1	8140/3: Adenocarcinoma, NOS	Dead (attributable to this cancer dx)	Alive or dead due to cancer
13433803	2	2	2	T2	T2	2	N0	0	3	3	2	0	0	0	0	0	0	1	2	1	8140/3: Adenocarcinoma, NOS	N/A not first tumor	N/A not first tumor
13516048	2	2	1	T2	T2	2	N1	0	unknown	unknown	1	0	0	0	0	1	0	0	1	1	8140/3: Adenocarcinoma, NOS	N/A not first tumor	N/A not first tumor
13928854	1	2	2	T2	T2	2	N0	0	unknown	unknown	3	0	1	1	0	1	0	0	11	1	8140/3: Adenocarcinoma, NOS	N/A not first tumor	N/A not first tumor
13952358	1	2	2	T4	T4	2	N0	0	unknown	unknown	2	1	1	0	0	1	0	0	45	1	8140/3: Adenocarcinoma, NOS	N/A not first tumor	N/A not first tumor
13957115	1	2	2	T2	T2	2	N0	0	unknown	unknown	2	0	1	0	0	1	0	1	3	1	8140/3: Adenocarcinoma, NOS	N/A not first tumor	N/A not first tumor
13966687	1	2	2	T2	T2	2	N1	0	3	3	1	0	0	0	0	1	1	1	6	1	8140/3: Adenocarcinoma, NOS	N/A not first tumor	N/A not first tumor
13973192	2	2	2	T4	T4	2	N1	0	unknown	unknown	2	0	1	0	0	1	0	0	22	1	8480/3: Mucinous adenocarcinoma	N/A not first tumor	N/A not first tumor
13988185	2	2	2	T2	T2	2	N0	0	unknown	unknown	2	0	1	0	0	1	0	0	2	1	8033/3: Pseudosarcomatous carcinoma	N/A not first tumor	N/A not first tumor
14026563	1	2	1	T2	T2	2	N0	0	unknown	unknown	1	0	0	0	0	1	0	0	3	1	8140/3: Adenocarcinoma, NOS	N/A not first tumor	N/A not first tumor
14037611	1	2	1	T2	T3	3	N1	0	unknown	unknown	2	1	1	0	0	1	0	0	5	1	8140/3: Adenocarcinoma, NOS	N/A not first tumor	N/A not first tumor
14042131	1	2	1	T3	T3	3	N1	0	unknown	unknown	1	0	1	0	0	1	0	0	6	1	8500/3: Infiltrating duct carcinoma, NOS	N/A not first tumor	N/A not first tumor
14065901	2	2	2	T4	T4	3	N0	0	2	2	3	0	1	0	0	0	0	0	3	1	8140/3: Adenocarcinoma, NOS	N/A not first tumor	N/A not first tumor
14078075	1	2	2	T3	T2	2	N0	0	4	3	3	0	1	0	0	0	0	1	11	1	8140/3: Adenocarcinoma, NOS	Dead (attributable to this cancer dx)	Alive or dead due to cancer
14483301	2	2	1	T2	T2	2	N1	0	unknown	unknown	1	0	0	0	0	1	1	1	1	1	8140/3: Adenocarcinoma, NOS	Dead (attributable to this cancer dx)	Alive or dead due to cancer
14486197	2	2	2	T2	T3	3	N0	0	unknown	unknown	1	0	0	0	0	1	0	1	1	1	8210/3: Adenocarcinoma in adenomatous polyp	Dead (attributable to this cancer dx)	Alive or dead due to cancer
14490381	1	2	1	T4	T4	3	N0	0	3	3	3	1	1	0	0	1	0	1	20	1	8500/3: Infiltrating duct carcinoma, NOS	Dead (attributable to this cancer dx)	Alive or dead due to cancer
14490925	1	2	1	T2	T2	2	N0	0	unknown	unknown	1	0	0	0	0	0	0	1	1	1	8140/3: Adenocarcinoma, NOS	Dead (attributable to this cancer dx)	Alive or dead due to cancer
14496342	1	2	1	T2	T2	2	N1	0	unknown	unknown	1	0	0	0	0	1	0	1	2	1	8140/3: Adenocarcinoma, NOS	Dead (attributable to this cancer dx)	Alive or dead due to cancer
14496444	2	2	2	T4	T4	3	N1	0	3	3	1	0	1	0	0	1	1	1	8	1	8140/3: Adenocarcinoma, NOS	Dead (attributable to this cancer dx)	Alive or dead due to cancer
14497273	2	2	2	T2	T2	2	N1	0	1	1	2	0	0	0	0	1	0	1	20	1	8140/3: Adenocarcinoma, NOS	Dead (attributable to this cancer dx)	Alive or dead due to cancer
14500254	2	2	2	T3	T3	3	N0	0	4	3	2	0	0	0	0	1	0	1	1	1	8140/3: Adenocarcinoma, NOS	Alive or dead of other cause	Dead (attributable to causes other than this cancer dx)
14504396	1	2	2	T1	T1	1	N0	0	unknown	unknown	2	0	0	0	0	1	0	1	28	1	8246/3: Neuroendocrine carcinoma, NOS	Dead (attributable to this cancer dx)	Alive or dead due to cancer
14506488	2	2	2	T3	T2	2	N1	1	3	3	1	0	0	0	0	1	0	1	74	0	8150/3: Pancreatic endocrine tumor, malignant	Alive or dead of other cause	Alive or dead due to cancer
14509027	1	2	1	T1	T1	1	N1	1	1	1	2	0	0	0	0	1	0	1	27	1	8010/3: Carcinoma, NOS	Alive or dead of other cause	Dead (attributable to causes other than this cancer dx)
14511708	1	2	2	T4	T4	3	N0	0	unknown	unknown	3	1	1	0	0	1	0	1	12	1	8500/3: Infiltrating duct carcinoma, NOS	Dead (attributable to this cancer dx)	Alive or dead due to cancer
14512407	1	2	1	T2	T2	2	N0	0	unknown	unknown	1	0	1	0	0	0	1	1	3	1	8140/3: Adenocarcinoma, NOS	Dead (attributable to this cancer dx)	Alive or dead due to cancer
14512948	1	2	2	T3	T3	3	N0	1	unknown	unknown	1	0	0	0	0	1	0	1	77	0	8246/3: Neuroendocrine carcinoma, NOS	Alive or dead of other cause	Alive or dead due to cancer
14513305	2	2	1	T4	T4	3	N0	0	unknown	unknown	2	0	0	0	0	0	0	1	4	1	8481/3: Mucin-producing adenocarcinoma	Dead (attributable to this cancer dx)	Alive or dead due to cancer
14516641	2	2	2	T3	T2	2	N0	0	2	2	2	0	1	0	0	1	0	1	2	1	8500/3: Infiltrating duct carcinoma, NOS	Dead (attributable to this cancer dx)	Alive or dead due to cancer
14517270	2	2	2	T2	T2	2	N0	0	unknown	unknown	2	0	1	0	0	1	0	1	4	1	8140/3: Adenocarcinoma, NOS	Dead (attributable to this cancer dx)	Alive or dead due to cancer
14518021	1	2	1	T2	T3	3	N1	0	unknown	unknown	2	0	0	0	0	1	0	1	1	1	8140/3: Adenocarcinoma, NOS	Dead (attributable to this cancer dx)	Alive or dead due to cancer
14519715	1	2	2	T2	T2	2	N0	0	unknown	unknown	2	0	0	0	0	1	0	0	26	1	8140/3: Adenocarcinoma, NOS	N/A not first tumor	N/A not first tumor
14521696	2	2	1	T3	T3	3	N0	0	unknown	unknown	2	0	1	0	0	1	0	1	6	1	8140/3: Adenocarcinoma, NOS	Dead (attributable to this cancer dx)	Alive or dead due to cancer
14521872	1	2	1	T2	T3	3	N1	0	unknown	unknown	2	0	1	1	0	1	1	1	6	1	8140/3: Adenocarcinoma, NOS	Dead (attributable to this cancer dx)	Alive or dead due to cancer
14522923	1	2	2	T4	T4	3	N0	0	unknown	unknown	1	1	1	0	0	1	0	1	2	1	8140/3: Adenocarcinoma, NOS	Dead (attributable to this cancer dx)	Alive or dead due to cancer
14524684	2	2	2	T2	T3	3	N0	0	unknown	unknown	2	0	0	0	0	0	0	1	3	1	8140/3: Adenocarcinoma, NOS	Dead (attributable to this cancer dx)	Alive or dead due to cancer
14526778	2	2	1	T4	T4	3	N1	0	unknown	unknown	2	0	1	0	0	1	0	1	3	1	8140/3: Adenocarcinoma, NOS	Dead (attributable to this cancer dx)	Alive or dead due to cancer
14526793	2	2	2	T2	T2	2	N0	0	unknown	unknown	1	0	1	0	0	0	1	1	2	1	8500/3: Infiltrating duct carcinoma, NOS	Dead (attributable to this cancer dx)	Alive or dead due to cancer
14530138	1	2	1	T3	T3	3	N0	0	3	3	2	0	1	0	0	0	0	1	10	1	8560/3: Adenosquamous carcinoma	Dead (attributable to this cancer dx)	Alive or dead due to cancer
14530192	2	2	2	T2	T2	2	N1	0	unknown	unknown	2	0	0	0	0	1	0	1	1	1	8140/3: Adenocarcinoma, NOS	Dead (attributable to this cancer dx)	Alive or dead due to cancer
14534337	2	2	1	T3	T3	3	N0	1	2	2	2	0	1	0	0	0	0	1	9	1	8140/3: Adenocarcinoma, NOS	Dead (attributable to this cancer dx)	Alive or dead due to cancer
14535320	2	2	2	T3	T2	2	N0	0	unknown	unknown	2	0	0	0	0	1	1	1	8	1	8140/3: Adenocarcinoma, NOS	Dead (attributable to this cancer dx)	Alive or dead due to cancer
14535694	2	2	1	T2	T2	2	N1	0	3	3	1	0	1	0	0	1	1	0	2	1	8033/3: Pseudosarcomatous carcinoma	N/A not first tumor	N/A not first tumor
14535827	2	2	2	T4	T4	2	N1	0	2	2	2	0	1	0	0	0	1	1	7	1	8500/3: Infiltrating duct carcinoma, NOS	Dead (attributable to this cancer dx)	Alive or dead due to cancer
14536278	2	2	2	T2	T2	2	N0	0	unknown	unknown	2	0	0	0	0	1	0	1	1	1	8140/3: Adenocarcinoma, NOS	Dead (attributable to this cancer dx)	Alive or dead due to cancer
14539123	1	2	1	T4	T4	3	N0	0	3	3	2	0	1	0	0	1	0	1	6	1	8500/3: Infiltrating duct carcinoma, NOS	Dead (attributable to this cancer dx)	Alive or dead due to cancer
14541962	2	2	2	T4	T4	3	N1	0	unknown	unknown	1	0	1	0	0	1	0	1	18	1	8246/3: Neuroendocrine carcinoma, NOS	Dead (attributable to this cancer dx)	Alive or dead due to cancer
14543195	1	2	1	T3	T3	3	N1	0	unknown	unknown	2	0	1	0	0	1	0	1	5	1	8140/3: Adenocarcinoma, NOS	Dead (attributable to this cancer dx)	Alive or dead due to cancer
14544206	1	2	2	T2	T2	2	N0	0	unknown	unknown	2	0	1	0	0	1	0	1	3	1	8140/3: Adenocarcinoma, NOS	Dead (attributable to this cancer dx)	Alive or dead due to cancer
14547353	1	2	2	T3	T3	3	N0	0	unknown	unknown	2	0	1	0	0	0	0	0	15	0	8240/3: Carcinoid tumor, NOS	N/A not first tumor	N/A not first tumor
14547684	2	2	1	T4	T4	1	N0	0	2	2	1	0	0	0	0	0	0	1	9	1	8500/3: Infiltrating duct carcinoma, NOS	Dead (attributable to this cancer dx)	Alive or dead due to cancer
14547873	2	2	1	T3	T2	2	N0	0	unknown	unknown	2	0	1	0	0	1	0	1	4	1	8140/3: Adenocarcinoma, NOS	Dead (attributable to this cancer dx)	Alive or dead due to cancer
14551040	1	2	2	T4	T4	3	N0	0	unknown	unknown	2	0	1	0	0	0	0	1	1	1	8500/3: Infiltrating duct carcinoma, NOS	Dead (attributable to this cancer dx)	Alive or dead due to cancer
14551387	2	2	1	T2	T3	3	N0	0	unknown	unknown	2	0	0	0	0	1	0	1	1	1	8140/3: Adenocarcinoma, NOS	Dead (attributable to this cancer dx)	Alive or dead due to cancer
14551910	2	2	1	T4	T4	3	N0	1	2	2	2	0	0	0	0	0	0	1	9	1	8140/3: Adenocarcinoma, NOS	Alive or dead of other cause	Dead (attributable to causes other than this cancer dx)
14553146	1	2	1	T2	T2	2	N0	0	unknown	unknown	1	0	1	0	0	1	0	1	2	1	8140/3: Adenocarcinoma, NOS	Dead (attributable to this cancer dx)	Alive or dead due to cancer
14555112	2	2	1	T4	T4	2	N1	0	unknown	unknown	3	0	0	0	0	1	0	1	60	0	8246/3: Neuroendocrine carcinoma, NOS	Alive or dead of other cause	Alive or dead due to cancer
14555180	2	2	1	T3	T3	3	N0	0	unknown	unknown	2	0	1	0	0	1	0	1	2	1	8140/3: Adenocarcinoma, NOS	Dead (attributable to this cancer dx)	Alive or dead due to cancer
14555995	1	2	1	T4	T4	3	N1	0	unknown	unknown	1	0	1	0	0	1	0	1	5	1	8160/3: Cholangiocarcinoma	Dead (attributable to this cancer dx)	Alive or dead due to cancer
14556308	2	2	1	T2	T3	3	N1	0	unknown	unknown	2	0	1	0	0	1	0	1	1	1	8140/3: Adenocarcinoma, NOS	Dead (attributable to this cancer dx)	Alive or dead due to cancer
14556741	2	2	1	T2	T3	3	N1	1	2	2	2	0	0	0	0	1	0	1	69	0	8246/3: Neuroendocrine carcinoma, NOS	Alive or dead of other cause	Alive or dead due to cancer
14558774	2	2	1	T2	T2	2	N0	0	3	3	2	0	1	0	0	1	1	0	8	1	8140/3: Adenocarcinoma, NOS	N/A not first tumor	N/A not first tumor
14562403	2	2	1	T2	T3	3	N1	0	unknown	unknown	3	0	1	0	0	1	1	1	1	1	8246/3: Neuroendocrine carcinoma, NOS	Dead (attributable to this cancer dx)	Alive or dead due to cancer
14563204	2	2	1	T2	T3	3	N0	0	unknown	unknown	2	0	1	1	0	1	0	1	10	1	8140/3: Adenocarcinoma, NOS	Dead (attributable to this cancer dx)	Alive or dead due to cancer
14565357	1	2	2	T2	T2	2	N0	0	unknown	unknown	1	0	1	0	0	0	0	1	11	1	8140/3: Adenocarcinoma, NOS	Dead (attributable to this cancer dx)	Alive or dead due to cancer
14566965	1	2	1	T4	T4	2	N0	0	unknown	unknown	2	0	1	0	0	1	0	1	10	1	8140/3: Adenocarcinoma, NOS	Dead (attributable to this cancer dx)	Alive or dead due to cancer
14568265	2	2	2	T1	T1	1	N1	0	2	2	1	1	0	0	0	1	0	1	45	1	8140/3: Adenocarcinoma, NOS	Dead (attributable to this cancer dx)	Alive or dead due to cancer
14568580	2	2	1	T2	T2	2	N1	0	unknown	unknown	1	0	1	0	0	1	1	1	4	1	8140/3: Adenocarcinoma, NOS	Dead (attributable to this cancer dx)	Alive or dead due to cancer
14570230	2	2	2	T2	T2	2	N1	0	unknown	unknown	2	0	1	0	0	0	0	1	9	1	8140/3: Adenocarcinoma, NOS	Dead (attributable to this cancer dx)	Alive or dead due to cancer
14570244	2	2	2	T2	T2	2	N0	0	unknown	unknown	1	0	1	0	0	0	0	1	2	1	8140/3: Adenocarcinoma, NOS	Dead (attributable to this cancer dx)	Alive or dead due to cancer
14573143	1	2	1	T2	T2	2	N1	0	unknown	unknown	2	0	0	0	0	1	0	0	2	1	8140/3: Adenocarcinoma, NOS	N/A not first tumor	N/A not first tumor
14574973	1	2	2	T2	T2	2	N1	0	unknown	unknown	1	1	1	0	0	1	1	1	9	1	8246/3: Neuroendocrine carcinoma, NOS	Dead (attributable to this cancer dx)	Alive or dead due to cancer
14574984	1	2	2	T2	T2	2	N0	0	unknown	unknown	1	0	1	0	0	1	0	1	10	1	8010/3: Carcinoma, NOS	Dead (attributable to this cancer dx)	Alive or dead due to cancer
14576759	2	2	2	T4	T4	2	N0	0	unknown	unknown	2	0	1	0	0	0	1	1	23	1	8140/3: Adenocarcinoma, NOS	Dead (attributable to this cancer dx)	Alive or dead due to cancer
14579549	2	2	1	T3	T2	2	N1	0	3	3	2	0	1	0	0	1	0	1	4	1	8140/3: Adenocarcinoma, NOS	Dead (attributable to this cancer dx)	Alive or dead due to cancer
[truncated: 8,166 more rows]
